1  
2  
3  
4  
5  
6  
7  
8  
9  
10  
11  
12  
13  
14  
15  
16  
17  
18  
19  
20  
21  
22  
23  
24  
25  
26  
27

**Rampant transposition following RNAi loss causes hypermutation and antifungal drug resistance in clinical isolates of a human fungal pathogen**

Shelby J. Priest<sup>1</sup>, Vikas Yadav<sup>1†</sup>, Cullen Roth<sup>2,3†</sup>, Tim A. Dahlmann<sup>4</sup>, Ulrich Kück<sup>4</sup>, Paul M. Magwene<sup>2</sup>, and Joseph Heitman<sup>1\*</sup>

<sup>1</sup> Department of Molecular Genetics and Microbiology, Duke University Medical Center, Durham, NC, USA

<sup>2</sup> Department of Biology, Duke University, Durham, NC, USA

<sup>3</sup> University Program in Genetics and Genomics, Duke University, Durham, NC, USA

<sup>4</sup> Allgemeine und Molekulare Botanik, Ruhr-Universität Bochum, Bochum, Germany

<sup>†</sup>These authors contributed equally to this work.

Short title: RNAi loss and transposition cause hypermutation in *Cryptococcus*

\* Corresponding author

Email: [heim001@duke.edu](mailto:heim001@duke.edu) (JH)

## 28 **Abstract**

29           Microorganisms survive and compete within their environmental niches and avoid  
30 evolutionary stagnation by stochastically acquiring mutations that enhance fitness. Although  
31 increased mutation rates are often deleterious in multicellular organisms, hypermutation can be  
32 beneficial for microbes in the context of strong selective pressures. To explore how  
33 hypermutation arises in nature and elucidate its consequences, we employed a collection of 387  
34 sequenced clinical and environmental isolates of *Cryptococcus neoformans*. This fungal  
35 pathogen is responsible for ~15% of annual AIDS-related deaths and is associated with high  
36 mortality rates, attributable to a dearth of antifungal drugs and increasing drug resistance.  
37 Isolates were screened for the ability to rapidly acquire antifungal drug resistance, and two  
38 robust hypermutators were identified. Insertion of the non-LTR Cnl1 retrotransposon was found  
39 to be responsible for the majority of drug-resistant isolates. Long-read whole-genome sequencing  
40 revealed both hypermutator genomes have two unique features: 1) hundreds of Cnl1 copies  
41 organized in subtelomeric arrays on both ends of almost all chromosomes, and 2) a nonsense  
42 mutation in the first exon of *ZNF3*, a gene encoding an RNAi component involved in silencing  
43 transposons. Quantitative trait locus mapping identified a significant genetic locus associated  
44 with hypermutation that includes the mutant *znf3* allele, and CRISPR-mediated genome editing  
45 of the *znf3* single-base pair nonsense mutation abolished the hypermutation phenotype and  
46 restored siRNA production. In sum, hypermutation and drug resistance in these isolates results  
47 from loss of RNAi combined with subsequent accumulation of a large genomic burden of a  
48 novel transposable element in *C. neoformans*.

## 49 Introduction

50 Stochastic mutations and genomic rearrangements provide variation in populations for  
51 natural selection to act upon and enable evolution. However, genetic changes are a double-edged  
52 sword: too little variation can lead to evolutionary stagnation, while too much variation can lead  
53 to a lethal accumulation of deleterious mutations. Hypermutation, one extreme of this mutational  
54 spectrum, can lead to adaptation, disease, or eventual extinction if left unchecked.

55 Microbes are known to adopt highly mutable states that would normally be viewed as  
56 deleterious from the perspective of multicellular organisms. Studies have found that  
57 microorganisms with defects in pathways associated with maintaining genomic integrity, such as  
58 those involved in chromosome stability, DNA mismatch repair, DNA damage repair, and cell  
59 cycle checkpoints associated with recognizing DNA damage, accelerate adaptation to  
60 environmental stressors<sup>1-3</sup>. These defects can be beneficial in the short term, yet deleterious in  
61 the long term as mutations continue to accumulate. Defects in DNA mismatch repair resulting in  
62 increased mutation rates have been reported in fungi, including the model yeast *Saccharomyces*  
63 *cerevisiae*, the human pathogen *Candida glabrata*, in an outbreak strain of *Cryptococcus*  
64 *deuterogattii*, and in several clinical isolates of the model basidiomycete human fungal pathogen  
65 *Cryptococcus neoformans*<sup>4-10</sup>. Genomic stability in pathogenic *Cryptococcus* species is also  
66 significantly affected by karyotypic changes and transposable elements, both of which can  
67 mediate antifungal drug resistance<sup>11-14</sup>.

68 *Cryptococcus* is an environmentally ubiquitous haploid basidiomycete and facultative  
69 human pathogen<sup>15</sup>. Approximately 95% of cryptococcal infections are attributable to the serotype  
70 A group, *C. neoformans* var. *grubii*, now known as *C. neoformans*, which is divided into four  
71 lineages: VNI, VNII, VNBI, and VNBII<sup>16-18</sup>. This species infects immunocompromised

72 individuals and accounts for ~15% of HIV/AIDS-related deaths<sup>19</sup>. The threat of cryptococcal  
73 infections is exacerbated because the arsenal of antifungal drugs is limited. Amphotericin B, a  
74 fungicidal polyene, is often used in combination with 5-flucytosine (5-FC), an antimetabolite, to  
75 treat cryptococcal infections<sup>20</sup>. Unfortunately, amphotericin B and 5-FC have undesirable side  
76 effects, and 5-FC monotherapy frequently leads to resistance<sup>21,22</sup>. Fluconazole is used to treat  
77 asymptomatic patients with isolated cryptococcal antigenemia, those with disease limited to lung  
78 nodules or central nervous system infections after clearance of cerebrospinal fluid cultures, or for  
79 chronic maintenance therapy<sup>20</sup>. However, *C. neoformans* frequently develops resistance to  
80 fluconazole via aneuploidy or mutations in the sterol biosynthesis pathway, contributing to  
81 recurrent infections<sup>11,23–25</sup>. The limited number of drugs available to treat cryptococcosis,  
82 prevalence of resistance and recurrent infections, and difficulty in developing novel antifungal  
83 therapies combine to make *C. neoformans* drug resistance an important clinical problem.

84        Transposons in the *C. neoformans* H99 reference strain and the sister species  
85 *Cryptococcus deneoformans* JEC21 reference strain have been characterized<sup>13,26,27</sup>. The genomes  
86 of these species encode many retrotransposons with and without long-terminal repeats, known as  
87 LTR retrotransposons and non-LTR retrotransposons, respectively, which move via a copy-and-  
88 paste mechanism, allowing them to proliferate throughout the genome if unchecked. The most  
89 well-characterized *Cryptococcus* LTR-retrotransposons are Tcn1 through Tcn6, which are  
90 primarily located in centromeric regions<sup>28</sup>. The *C. deneoformans* JEC21 genome also encodes  
91 three types of DNA transposons (T1, T2, and T3), as well as ~25 copies of the non-LTR  
92 retrotransposon Cnl1 (*C. neoformans* LINE-1), which is thought to associate with telomeric  
93 repeat sequences<sup>13,14,29</sup>. In the *C. neoformans* H99 genome, there are no full-length copies of  
94 Cnl1, and DNA transposons are rare<sup>13</sup>.

95           Studies have illustrated that transposon silencing in *Cryptococcus* is governed by RNAi  
96 through three primary lines of evidence: 1) siRNAs map predominantly to transposable elements,  
97 2) RNAi mutants show increased transposon expression, and 3) spliceosomes stall on  
98 transposable element transcripts at an unusually high rate, triggering RNAi<sup>13,30-34</sup>. Other  
99 mechanisms thought to regulate *Cryptococcus* transposons include 5-methylcytosine DNA  
100 methylation<sup>28,35,36</sup> and heterochromatic marks<sup>37</sup>. Interestingly, the outbreak species *C.*  
101 *deuterogattii* is RNAi deficient because many genes encoding RNAi components are severely  
102 truncated or absent entirely<sup>32</sup>. This loss of RNAi has been shown to be associated with loss of all  
103 functional transposable elements, consequently shorter centromeres, and higher rates of intron  
104 retention<sup>28,38</sup>.

105           Here, we identified two clinical, hypermutator *C. neoformans* isolates with significantly  
106 increased mutation rates on antifungal drug media. The majority of drug resistance in these two  
107 strains is mediated by insertions of the Cnl1 transposon into genes whose mutation confers  
108 resistance. Genetic backcrossing, quantitative trait loci mapping, and CRISPR-mediated gene  
109 editing all confirmed that a nonsense mutation in the RNAi component *ZNF3*, resulting in loss of  
110 RNAi, is the cause of hypermutation in these two strains. Small RNA sequencing confirmed the  
111 role of Znf3 in silencing Cnl1, and whole-genome sequencing revealed both hypermutator  
112 genomes encode >800 copies or fragments of Cnl1. This is the first time full-length copies of  
113 Cnl1 have been identified in *C. neoformans*, and the massive Cnl1 burden in these hypermutators  
114 is substantially higher than previously observed in any other *Cryptococcus* strain. Our results  
115 demonstrate the hypermutator phenotype described here is attributable to loss of RNAi, allowing  
116 rampant transposition of Cnl1. These transposition events lead to Cnl1 accumulation at  
117 subtelomeres and movement to novel genomic locations, which can result in drug resistance.

## 118 **Results**

### 119 **Identification of two clinical, hypermutator *C. neoformans* isolates**

120 To identify natural isolates of *C. neoformans* with increased mutation rates, we screened  
121 strains in the Strain Diversity Collection (SDC) for an increased ability to produce colonies  
122 resistant to various classes of antifungal drugs. The SDC contains 387 strains from all four *C.*  
123 *neoformans* lineages (VNI, VNII, VNBI and VNBII), including geographically diverse clinical  
124 and environmental isolates of both mating types. For each isolate in this collection, whole-  
125 genome sequencing (WGS) and phylogenetic relationships are available<sup>18</sup>. To screen isolates for  
126 increased mutation rates in a relatively high-throughput manner, strains were grown in liquid  
127 cultures, swabbed onto agar plates supplemented with either 5-fluorocytosine (5-FC) or a  
128 combination of FK506 and rapamycin (immunosuppressants that bind FKBP12 to form  
129 complexes that inhibit activity of calcineurin and TOR, respectively), and qualitatively evaluated  
130 for their ability to generate resistant colonies (Figure 1A)<sup>39-42</sup>. Strains that produced more  
131 spontaneously resistant colonies on average than the control strain H99 were categorized as  
132 hypermutator candidates. We screened 186 strains and identified 40 hypermutator candidates  
133 (Table S1). Interestingly, all but one of fourteen (93%) environmental isolates screened were  
134 identified as hypermutator candidates (as compared to only 16% (27/170) clinical isolates, *p*-  
135 value < 0.001, Fisher's exact test). Two previously identified hypermutator strains with  
136 mismatch repair defects, C23 and C45, were identified as hypermutator candidates as well<sup>9</sup>.

137 We chose to focus on two clinical strains, Bt65 and Bt81, that produced the most  
138 rapamycin + FK506-resistant (R+F<sup>R</sup>) colonies (Figure 1A). Bt65 and Bt81 are both VNBII  
139 *MATa* strains isolated from different HIV-positive individuals in Botswana<sup>18,43</sup>. To quantify the  
140 mutation rates of Bt65 and Bt81, we performed fluctuation assays on YPD + rapamycin +

141

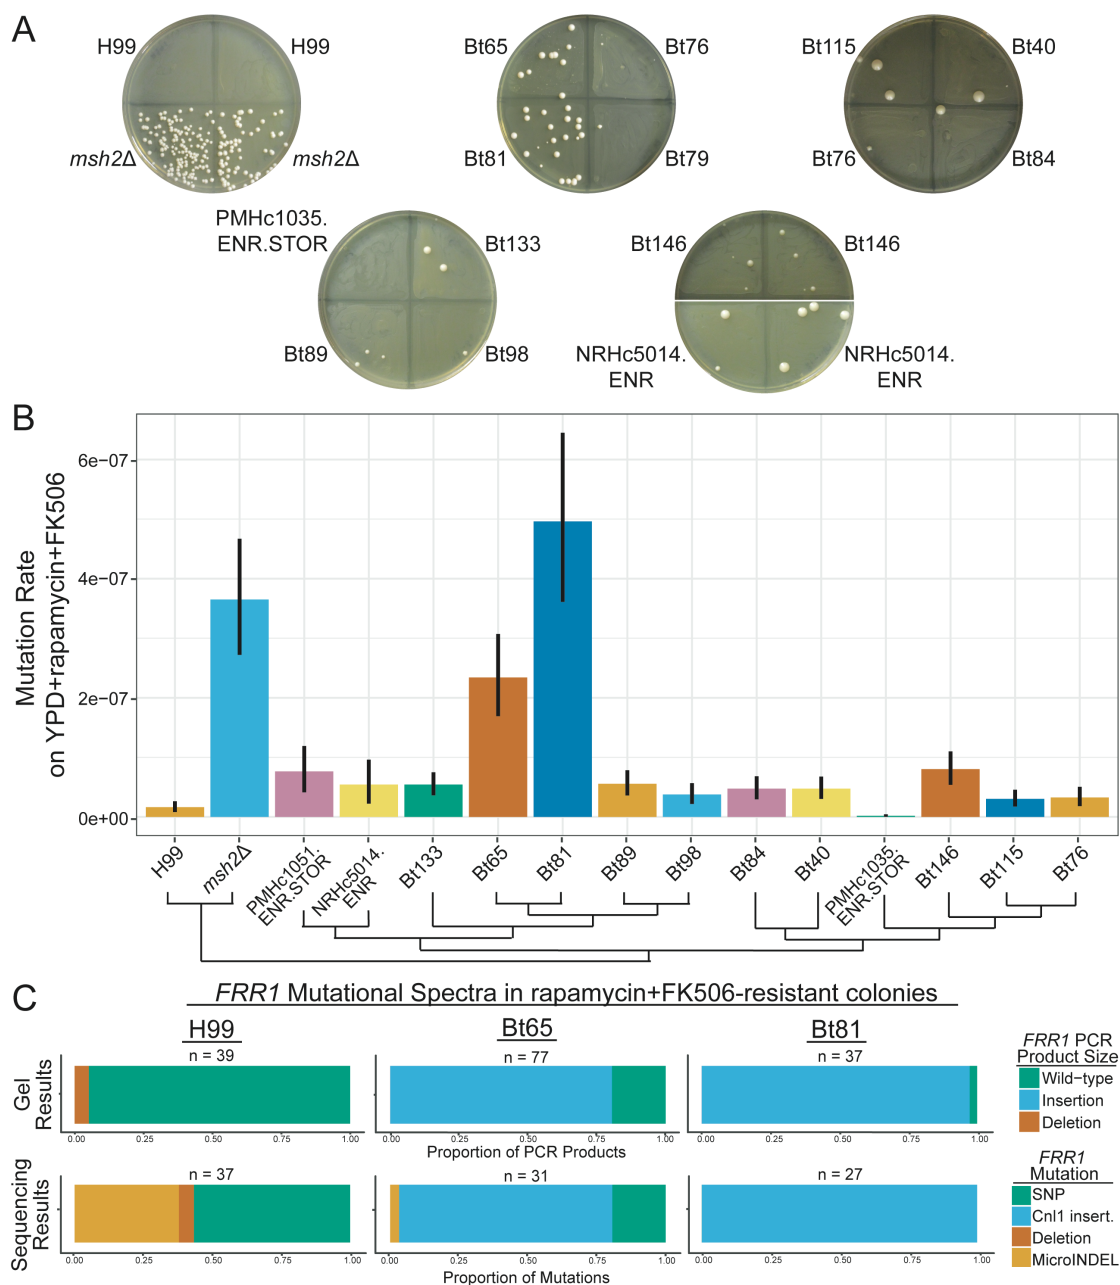

142

**Figure 1. Hypermutation in Bt65 and Bt81 is driven primarily by the insertion of Cnl1 into *FRR1*.** (A) Generation of spontaneously resistant colonies on YPD + rapamycin + FK506 medium was utilized to identify hypermutator candidates; pictures of representative plates are shown. Strains include the phylogenetically closely related strains involved in fluctuation assay in B as well as positive (*msh2Δ*) and negative (H99) controls. (B) Mutation rates of closely related VNBII strains and controls on YPD + rapamycin + FK506. Bars represent the mutation rate and error bars represent 95% confidence intervals; mutation rates represent the number of mutations per cell per generation. Schematic depicts the phylogenetic relationships of all strains included in fluctuation analyses based on Desjardins et al. 2017<sup>18</sup>. Mutational spectra in *FRR1* in YPD + rapamycin + FK506-resistant colonies of H99, Bt65, and Bt81 as characterized by (C) gel electrophoresis and Sanger sequencing of *FRR1* PCR products. MicroINDELs are defined as insertions or deletions < 50 bp. All mutations are relative to the appropriate rapamycin + FK506-sensitive parental strain.

143 FK506, YNB + 5-fluoroorotic acid (5-FOA), and YNB + 5-FC media. Both Bt65 and Bt81  
144 produced significantly higher mutation rates on YPD + rapamycin + FK506 compared to H99 as  
145 well as eleven of the most closely phylogenetically related strains (Figure 1B). On 5-FC, only the  
146 strain NRHc5014.ENR and the KN99 $\alpha$  *msh2* $\Delta$  positive control had significantly higher mutation  
147 rates compared to H99 (Figure S1A); on 5-FOA medium (Figure S1B), only KN99 $\alpha$  *msh2* $\Delta$   
148 produced a significantly higher mutation rate.

149 A recent study illustrated how incubation at an elevated temperature of 37°C results in  
150 increased mutation rates due to transposon mobilization in the closely related species *C.*  
151 *deneoformans*<sup>14</sup>. To determine if elevated temperature contributed to hypermutation in Bt65 and  
152 Bt81, we concurrently grew these strains as well as wild-type H99 and *msh2* $\Delta$ , *ago1* $\Delta$ , and  
153 *rdp1* $\Delta$  genetic deletion mutants in the H99 genetic background overnight at 30°C and 37°C, and  
154 then performed a fluctuation analysis on YPD + rapamycin + FK506 medium. Fluctuation  
155 analysis revealed H99, Bt65, and Bt81 had lower mutation rates when grown overnight at 37°C  
156 compared to growth at 30°C (Figure S2). Interestingly, all of the genetic deletion mutants  
157 showed increased mutation rates after growth at 37°C (Figure S2). These results suggest that  
158 unlike *C. deneoformans*, growth at 37°C reduces mutation rates in wild-type *C. neoformans*  
159 strains and does not contribute to or exacerbate hypermutation in Bt65 and Bt81.

160

### 161 **Characterization of mutation spectra in *C. neoformans* hypermutator strains**

162 After quantifying the mutation rates of Bt65 and Bt81 strains on media with various  
163 antifungal drugs, we investigated the types of mutations conferring resistance to the combination  
164 of rapamycin and FK506. PCR amplification of the *FRR1* gene (which encodes FKBP12, the  
165 shared target of rapamycin and FK506, and the only gene in which mutations confer resistance to



166 both FK506 and rapamycin) followed by gel electrophoresis revealed the expected wild-type  
167 PCR product size (~1.2 kb) for all but two (35/37) H99 R+F<sup>R</sup> colonies; the remaining two  
168 produced PCR products smaller than expected, indicative of deletions (Figure S3A). In contrast,  
169 large insertions of various sizes were observed in the majority of the Bt65 and Bt81 R+F<sup>R</sup>  
170 colonies (62/77 and 36/37 independent colonies, respectively) (Figure 1C, S3B, C). Only one  
171 resistant colony derived from a non-hypermutator strain, Bt84, (1/10 independent colonies) had  
172 an insertion in *FRR1*. No insertions in *FRR1* were observed in any of the other closely related or  
173 control strains.

174 We subsequently sequenced *FRR1* in H99, Bt65, Bt81, and Bt84 R+F<sup>R</sup> colonies to  
175 determine the genetic changes responsible for the larger PCR products (Figure 1C). In 37 R+F<sup>R</sup>  
176 colonies of the H99 control strain, SNPs in *FRR1* were largely responsible for resistance (57%,  
177 21/37 colonies), while resistance in the remaining colonies was attributable to small  
178 insertions/deletions (microINDELs; 38%, 14/37) or large deletions (5%, 2/37). Conversely, in  
179 the hypermutator isolate Bt65, insertions of the non-LTR retrotransposon Cn11 were responsible  
180 for the majority of rapamycin + FK506 resistance (77.4%, 24/31). Rapamycin + FK506  
181 resistance in the remaining Bt65 colonies was either due to SNPs (19.4%, 6/31) or microINDELs  
182 (3.2%, 1/31). In all sequenced PCR products from R+F<sup>R</sup> colonies of Bt81, Cn11 insertions were  
183 responsible for resistance (27/27 colonies). Cn11 insertions in Bt65 and Bt81 ranged from 54 bp  
184 to ~3500 bp, and this range in transposon sizes is a common characteristic of non-LTR  
185 retrotransposons. The single insertion observed in *FRR1* in the R+F<sup>R</sup> colony of Bt84 had no  
186 homology with any annotated *Cryptococcus* transposons but was identified as a repetitive  
187 element by RepeatMasker and shared minor homology with a Copia-58 BG-I transposable  
188 element.

189           The 5-FC- and 5-FOA-resistant colonies of Bt65, Bt81, and H99 were similarly  
190 characterized to determine the sources of resistance to antifungal drugs with different  
191 mechanisms of action. Resistance to 5-FOA is conferred by mutations in the *URA3* or *URA5*  
192 genes of the uracil biosynthesis pathway<sup>44,45</sup>. Among the subset of H99, Bt65, and Bt81 5-FOA<sup>R</sup>  
193 colonies sequenced, mutations were only identified in *URA5*. In almost all colonies, resistance  
194 was conferred by SNPs or INDELs, and only one Cnl1 insertion event was identified in a Bt81 5-  
195 FOA<sup>R</sup> colony (Figure S3D). We also PCR amplified genes in which mutations are known to  
196 confer resistance to 5-FC, including *FURI* and *UXS1*<sup>46</sup>. Only two of the 5-FC<sup>R</sup> isolates analyzed  
197 from H99, Bt65, and Bt81 produced a PCR product larger than expected for all assessed genes,  
198 and subsequent sequencing revealed a Cnl1 insertion in *FURI* in two independent 5-FC<sup>R</sup> Bt81  
199 isolates (Figure S3E).

200           Analysis of the Cnl1 insertions observed to confer resistance to rapamycin + FK506, 5-  
201 FC, and 5-FOA revealed Cnl1 preferentially inserts at guanine- and cytosine-rich regions of  
202 target genes, a known property of this element<sup>27</sup>. Target site duplication sequences flanking Cnl1  
203 insertions were not present in many instances, but when present, ranged from 1 to 12 bp in  
204 length. Cnl1 insertions ranged greatly in size, from 25-bp fragments to full-length Cnl1 copies  
205 (3,494 bp). The smallest Cnl1 insertion (25 bp) was followed immediately by a 59-bp deletion in  
206 *FRR1*. Cnl insertions in the *FRR1* gene were observed in both orientations (5' to 3' and 3' to 5'  
207 relative to *FRR1* transcription). Of the 51 characterized Cnl1 *FRR1* insertions, 27 were in the 5'  
208 UTR, and all but one were in the same orientation as *FRR1* transcription, 23 were in exons (7  
209 oriented 5' to 3', 16 oriented 3' to 5'), and one insertion was in an intron of *FRR1* in the 3' to 5'  
210 orientation, potentially disrupting splicing or transcription.

211

## 212 **QTL mapping identifies loci that significantly contribute to the hypermutator phenotype**

213 To determine the genetic cause of the hypermutator phenotype and rampant transposition  
214 in Bt65 and Bt81 and to determine the genetic consequences of this phenotype, we conducted  
215 quantitative trait locus (QTL) mapping. For this purpose, a total of 165 basidiospores were  
216 dissected from a genetic cross between Bt65 *MATa* and an H99 *crg1Δ MATa* mutant with an  
217 enhanced mating phenotype, and 47 F<sub>1</sub> progeny germinated (28%).

218 Twenty-eight Bt65a x H99α F<sub>1</sub> progeny were selected for fluctuation analysis and whole-  
219 genome sequencing. Aligning the paired-read Illumina sequencing data from the 28 F<sub>1</sub> progeny  
220 identified 215,411 bi-allelic SNPs that were utilized for QTL mapping. For 24 of the segregants  
221 as well as for the Bt65 and H99 *crg1Δ* parental strains, the mutation rate on rapamycin + FK506  
222 medium served as the phenotype for association tests (Figure 2A). Across the 14 chromosomes  
223 and bi-allelic SNP sites, two QTL with large effect (heritability = 64%) were identified at  
224 approximately 919-1,120 kb on Chromosome 3 and 987-1,193 kb on Chromosome 11 (Figure  
225 2B and S4). Analysis of these QTLs revealed that the SNPs in each QTL were co-segregating  
226 and that they shared the same distributions of phenotype scores (Figure S4 and S5). The borders  
227 of the QTL spanning Chromosomes 3 and 11 were determined by calculating 95% confidence  
228 intervals and examining recombination break points along each chromosome. Interestingly, these  
229 two QTLs span the chromosomal translocation between Chromosomes 3 and 11 that is unique to  
230 H99 (Figure S4, S5, S6). We thus treated these QTLs as the same QTL for subsequent analysis.

231 Within the QTL there are a total of 108 and 85 genes along Chromosome 3 and  
232 Chromosome 11, respectively, and for 82 and 77 of these genes (respectively), the published  
233 annotation and SNP data was used to characterize differences in predicted protein sequence and  
234 expected protein lengths between the H99 and Bt65 parental strains (Figure S4 and Table S2).

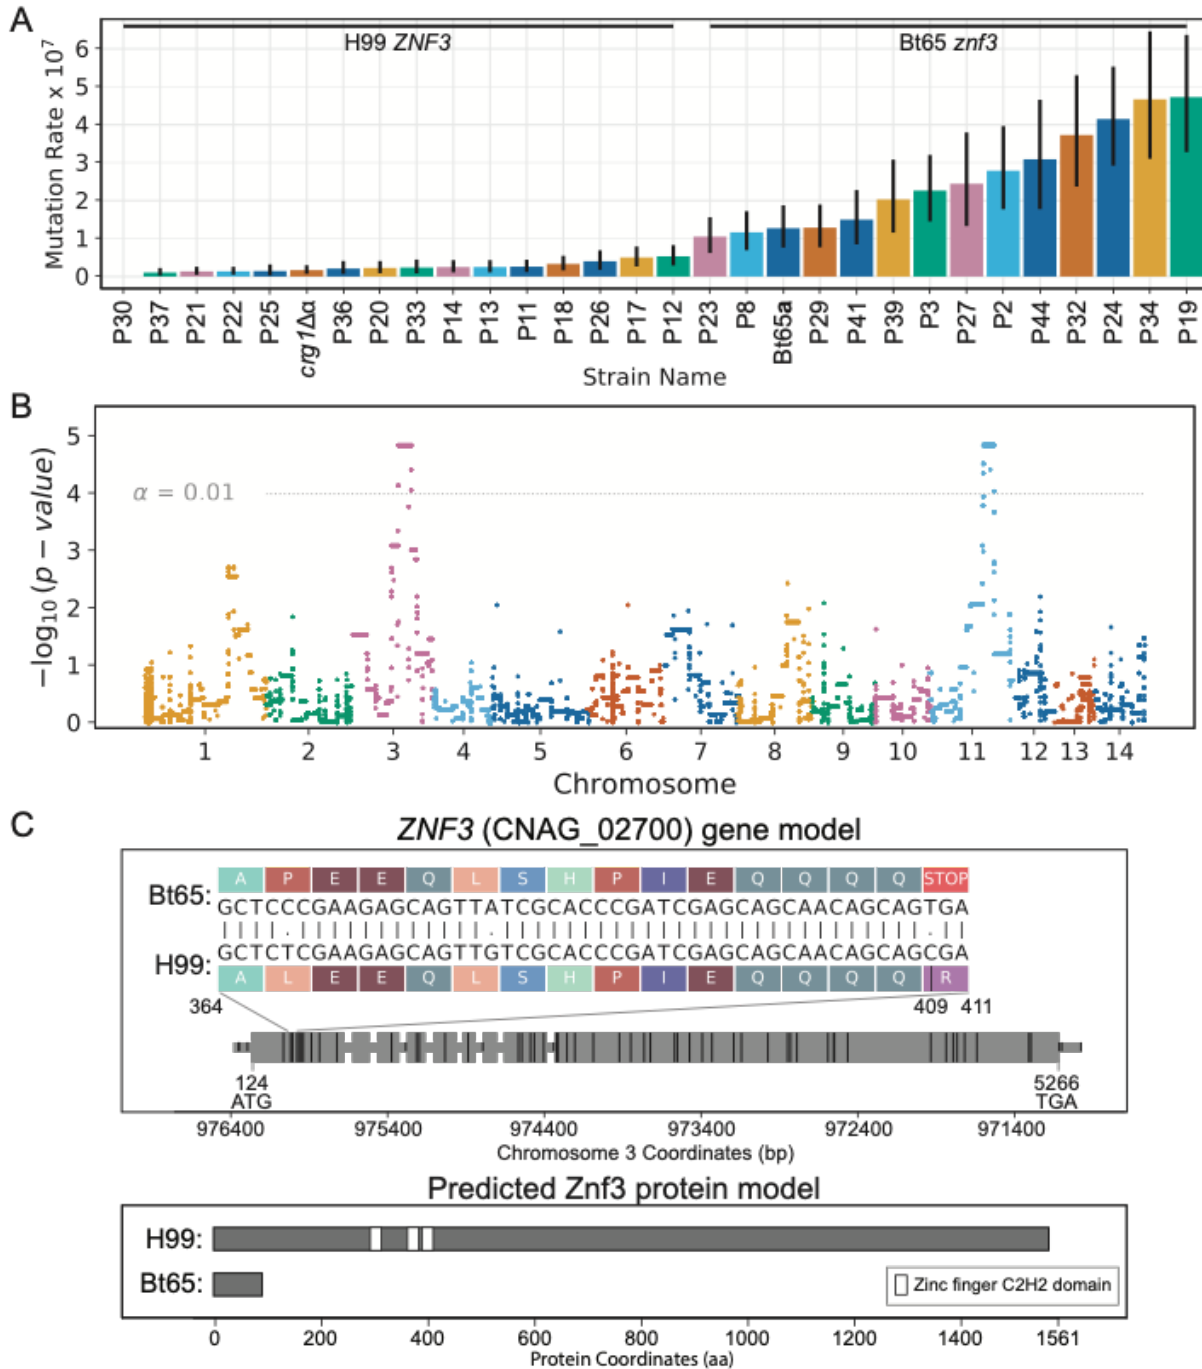

**Figure 2. QTL analysis of hypermutator phenotype.** (A) Quantification of mutation rates on YPD + rapamycin + FK506 medium – sorted smallest to largest, left to right – for F<sub>1</sub> progeny and parental strains, H99 *crg1Δ* and Bt65. Inheritance of the Bt65 *znf3* allele or H99 *crg1Δ ZNF3* allele in F<sub>1</sub> progeny is indicated above mutation rates. Colored bar plots and vertical black lines depict the mean mutation rate and associated 95% confidence intervals (CI) per segregant. Mutation rates represent the number of mutations per cell per generation. (B) Manhattan plot showing the strength in association (y-axis) between bi-allelic SNPs and hypermutator phenotype, across the 14 chromosomes (x-axis). Colors separate SNPs across chromosomes. The permutation-based significance threshold ( $\alpha = 0.01$ ) is depicted with a horizontal dashed line. (C) Predicted *ZNF3* gene and *Znf3* protein models in H99 and Bt65. A grey horizontal bar depicts the gene body in the upper panel, and larger grey rectangles represent exons; the gene is depicted 5' to 3' and is 5417 nt in length. The locations of SNPs differing

between Bt65 and H99 are shown by vertical black rungs along the gene model. Amino acids specified by mRNA codons in the indicated region of *ZNF3* exon 1 (nucleotides 364 to 411) are shown for H99 and Bt65 to illustrate the effect of the C to T mutation (nucleotide 409) predicted to cause a nonsense mutation in Bt65. The bottom panel depicts the predicted impact of the nonsense mutation on the Znf3 protein in Bt65. White rectangles along the protein schematic depict the three C2H2-type zinc finger domains of Znf3.

237 Among these, 71 and 60 genes along Chromosome 3 and Chromosome 11, respectively, have at  
238 least one predicted nonsynonymous change in protein sequence, seven of which harbor a  
239 predicted nonsense (i.e. stop-gain) or stop-loss mutation. One of these genes is *ZNF3*  
240 (CNAG\_02700), which encodes a C2H2 type zinc finger protein with three zinc finger domains.  
241 Znf3 was previously identified as an RNAi silencing component that localizes to P-bodies and  
242 whose mutation results in increased expression of transposable elements<sup>32,33</sup>. *ZNF3* is located on  
243 Chromosome 3 and has a SNP – C to T – within the first exon in the Bt65 genetic background,  
244 which is predicted to cause a nonsense mutation, severely truncating Znf3 from 1,561 amino  
245 acids to only 96 amino acids (Figure 2C). In addition, this nonsense mutation may also result in  
246 nonsense-mediated mRNA decay of the mutant *znf3* mRNA. Based on the publicly available  
247 whole-genome sequencing of all isolates in the SDC, the *znf3* nonsense mutation in exon 1 is  
248 unique to Bt65 and Bt81 and not present in any other strain. Another gene of known function  
249 within the QTL encodes a long-chain acyl-CoA synthetase (CNAG\_01836, Chromosome 11)  
250 and a SNP – G to A – within the last exon of this gene is predicted to cause an early nonsense  
251 mutation in the Bt65 background (Figure S7). Given the dramatic difference in the predicted  
252 protein length of *ZNF3* between the H99 and Bt65 parental alleles (relative to other genes in this  
253 QTL with predicted stop-loss or nonsense mutations), and previous studies demonstrating the  
254 role of Znf3 in RNAi and transposon silencing, we hypothesized *ZNF3* could be the quantitative  
255 trait gene (QTG) and the SNP leading to the predicted stop gain in the first exon could be the  
256 quantitative trait nucleotide (QTN) underlying the hypermutation phenotype<sup>32,33</sup>.

257

## 258 **Few Bt81 F<sub>1</sub> progeny display a hypermutator phenotype**

259         In addition to generating and analyzing Bt65a x H99a *crgI*Δ F<sub>1</sub> progeny, 42 F<sub>1</sub> progeny  
260 were derived from a genetic cross between the other hypermutator strain, Bt81a, and H99a  
261 *crgI*Δ. The *ZNF3* alleles of all 42 Bt81 F<sub>1</sub> progeny were sequenced to determine whether they  
262 had inherited the non-functional *znf3* allele from Bt81 or the functional *ZNF3* allele from H99.  
263 Of the 42 F<sub>1</sub> progeny, only four inherited the mutant *znf3* allele from Bt81, a significantly lower  
264 number than would be expected based on Mendelian inheritance patterns (chi-square test, *p*-  
265 value < 0.01). The four progeny with non-functional Bt81 *znf3* alleles had the highest mutation  
266 rates of 18 F<sub>1</sub> progeny that were analyzed (Figure S8). The mutation rates for three of the four  
267 *znf3* progeny, however, were not significantly higher than the Bt81 F<sub>1</sub> progeny with functional  
268 the *ZNF3* allele and were not as high as would be expected based on the results from the Bt65a x  
269 H99a F<sub>1</sub> progeny (Figure 2A).

270

## 271 **Cn11 elements are organized into subtelomeric arrays in hypermutator genomes**

272         For all strains in the SDC, including Bt65 and Bt81, only short-read WGS data was  
273 available<sup>18</sup>. Because of the known difficulties in assembling repetitive elements, such as Cn11,  
274 with short-read sequencing data, we conducted long-read WGS with the Oxford Nanopore  
275 Technologies MinION sequencing platform to generate more complete assemblies for Bt65,  
276 Bt81, and two of the most closely phylogenetically related non-hypermutator strains, Bt89 and  
277 Bt133. With the long-read sequencing data, we were able to assemble chromosome-level  
278 genomes for all four strains. In the assemblies, we observed the known chromosomal  
279 translocation between Chromosomes 3 and 11 unique to H99<sup>47</sup> and identified a translocation

280 between Chromosomes 1 and 13 unique to Bt65 and Bt81 (Figure S6). These two gross  
281 chromosomal rearrangements explain the relatively low germination frequency (28%) of Bt65a x  
282 H99 $\alpha$  F<sub>1</sub> progeny because each translocation should decrease germination by ~50%.

283 Analysis of the genomes of Bt65 and Bt81 revealed large arrays of the Cnl1 transposon at  
284 all but one end of each of the 14 linear chromosomes (27/28 subtelomeric regions in Bt65 and  
285 28/28 in Bt81) (Figure 3A, 3B). The assembled Cnl1 arrays (defined as  $\geq 2$  Cnl1 copies) in Bt65  
286 and Bt81 range from 5 kb to 80 kb in length. These highly repetitive arrays made it difficult and,  
287 in some instances, impossible to confidently assemble telomeric repeat sequences at the ends of  
288 each Bt65 and Bt81 chromosome. Using manual telomere extension via read mapping, we were  
289 able to identify telomere repeats at only 20 chromosome ends in Bt65 and 13 in Bt81. In contrast  
290 to Bt65 and Bt81, genome assemblies for Bt89 and Bt133 were assembled with telomere repeats  
291 on all 28 chromosome ends without any manual extension (Figure S6). In these assemblies, some  
292 telomeres had no copies of Cnl1 while others had Cnl1 arrays up to 30 kb in length (Figure S9).

293 Further analysis revealed the Bt65 genome harbors at least 414 fragments of Cnl1,  
294 including 105 full-length copies, while the Bt81 genome appears to encode even more Cnl1  
295 elements, with at least 449 fragments, including 147 full-length copies (Table 1). It is important  
296 to note that due to incomplete ends for most chromosomes, it is likely Bt81 and Bt65 encode  
297 additional copies of Cnl1 that were not assembled. The presence of long Cnl1 arrays in Bt65 and  
298 Bt81 was surprising because the *C. neoformans* H99 reference strain encodes only 22 fragments  
299 of Cnl1 and no full-length copies, and therefore, *C. neoformans* was not thought to harbor  
300 functional Cnl1 elements (Figure 3C) (Table 1).

301 Apart from the subtelomeres, retrotransposons in *Cryptococcus* are also enriched at  
302 centromeres, specifically the LTR retrotransposons Tcn1-Tcn6<sup>26,28,47</sup>. The changes in Cnl1

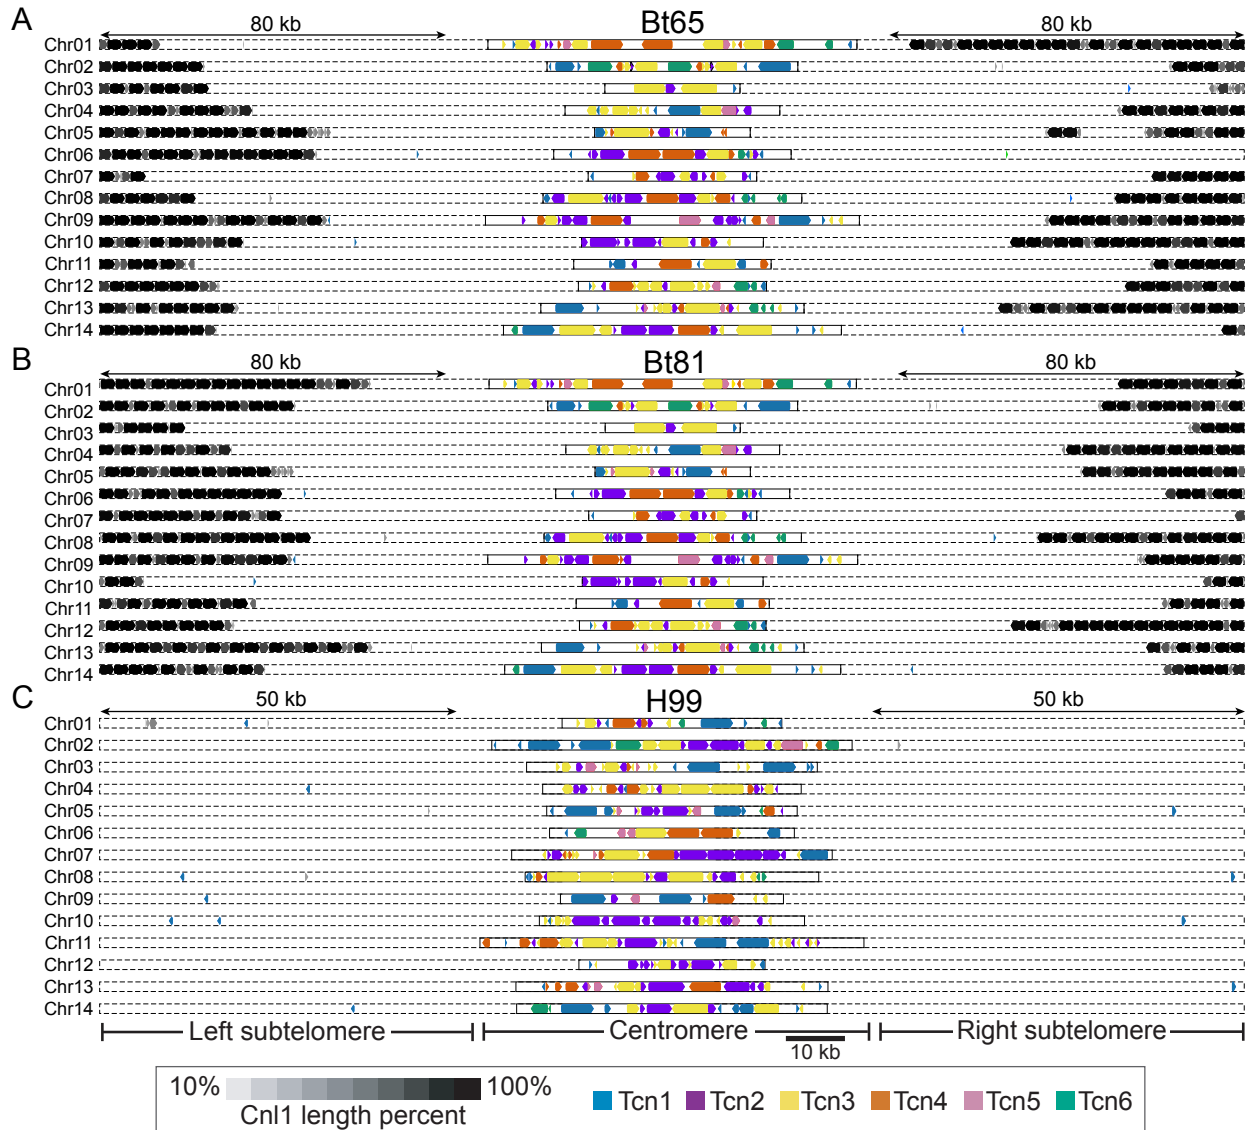

**Figure 3. Retrotransposon content in the genomes of H99, Bt65, and Bt81.** Distributions of the Tcn1 through Tcn6 LTR-retrotransposons and the Cn11 non-LTR retrotransposon in subtelomeric and centromeric regions of (A) Bt65, (B) Bt81, and (C) H99 genomes depicted in Figure S6. In Bt65 and Bt81, 80 kb of subtelomeric regions are displayed, and 50 kb subtelomeric regions are displayed for H99 to show the full distribution of subtelomeric Cn11 elements. Subtelomeric arrays of Cn11 are depicted at the end of each chromosome in Bt65 and Bt81, while only 7 Cn11 elements are localized subtelomerically in H99. Shading corresponds to fragments of the Cn11 elements, and gene arrowheads indicate the direction of transcription for all retrotransposons.

303 transposon content in Bt65 and Bt81 along with a previous study establishing a link between loss  
 304 of RNAi and centromere length<sup>28</sup> motivated us to characterize the centromeres in Bt65, Bt81,  
 305 Bt89, and Bt133. Identification of centromeres in these four isolates revealed shorter centromeres  
 306 on average compared to H99: 40.3 kb in Bt65, 40 kb in Bt81, 35.6 kb in Bt89, and 41.2 kb in



307 **Table 1. Cnl1 burden in H99, hypermutator strains, related non-hypermutator strains, and**  
308 **six Bt65 x H99 *crg1Δα* F<sub>1</sub> progeny based on Nanopore sequencing data.**

| Strain     | Hypermutator Status | Total Cnl1 burden (>50 bp) | Full-length Cnl1 copies (>99% in length) |
|------------|---------------------|----------------------------|------------------------------------------|
| H99        | Non-hypermutator    | 22                         | 0                                        |
| Bt65       | Hypermutator        | 414                        | 105                                      |
| Bt81       | Hypermutator        | 449                        | 147                                      |
| Bt89       | Non-hypermutator    | 261                        | 24                                       |
| Bt133      | Non-hypermutator    | 246                        | 23                                       |
| Progeny 2  | Hypermutator        | 212                        | 30                                       |
| Progeny 8  | Hypermutator        | 172                        | 40                                       |
| Progeny 14 | Non-hypermutator    | 296                        | 68                                       |
| Progeny 18 | Non-hypermutator    | 321                        | 88                                       |
| Progeny 20 | Non-hypermutator    | 425                        | 136                                      |
| Progeny 34 | Hypermutator        | 187                        | 41                                       |

309 Bt133, compared to an average length of 47.3 kb in H99. However, this difference did not reach  
310 statistical significance (ANOVA,  $p$ -value = 0.153, Figure S10 and Table S3). Many centromeres  
311 in the assessed VNBII isolates had undergone numerous rearrangements and several inversions  
312 relative to one another (Figure S11). Centromeric alterations have also previously been observed  
313 in *C. neoformans* genetic deletion mutants lacking the canonical RNAi components Ago1 and  
314 Rdp1<sup>28</sup>. Combined, these analyses suggest that while Cnl1 is more abundant in the  
315 hypermutators Bt65 and Bt81 as well as the non-hypermutators Bt89 and Bt133, other  
316 retrotransposons are not substantially increased in number compared to H99 (Figure 3 and S9).

317

318 **Characterization of H99 *crg1Δ* x Bt65 F<sub>1</sub> progeny genomes reveals invasion of Cnl1**  
319 **elements into naïve telomeres**

320 Expression of transposable elements, including Cnl1, has been shown to be upregulated  
321 during sexual reproduction in *C. neoformans*<sup>30,32,34</sup>. To investigate how increased expression of

322 Cn1 during mating impacts the genome, six of the 28 progeny utilized for QTL mapping were  
323 also selected for long-read whole-genome sequencing on the nanopore MinION sequencing  
324 platform: three hypermutator progeny that inherited the Bt65 *znf3* allele (P2, P8, and P34) and  
325 three non-hypermutator progeny that inherited the H99 *ZNF3* allele (P14, P18, and P20).  
326 Nanopore sequencing identified recombination points across the genomes of the progeny,  
327 providing information on which genomic regions were inherited from either parent and  
328 confirming these were F<sub>1</sub> genetic recombinants (Figure 4).

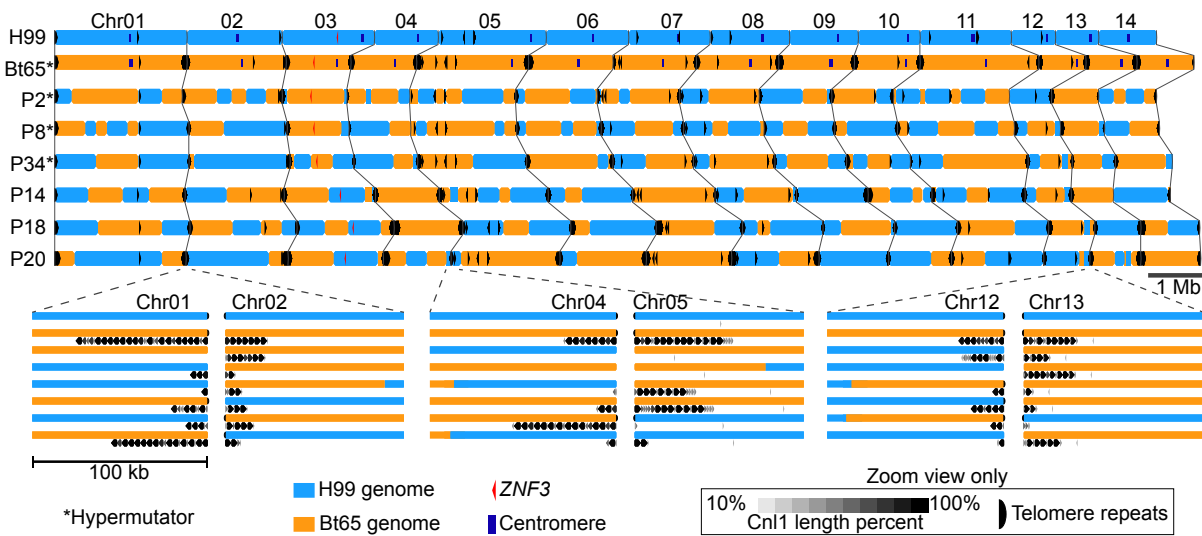

**Figure 4. Genetic recombination sites and Cn1 distribution in Bt65 x H99 F<sub>1</sub> progeny.**

Recombination sites along each of the 14 chromosomes for the six Bt65a x H99a F<sub>1</sub> progeny for which long-read whole-genome sequencing was conducted. Genomic loci depicted in blue were inherited from the H99 parent, and orange genomic loci were inherited from the Bt65 parent. Cn1 elements throughout the F<sub>1</sub> progeny and parental genomes are indicated by black arrowheads in the upper panel. Centromeres are indicated by dark blue boxes in only the parental genomes. Hypermutator F<sub>1</sub> progeny are indicated with asterisks, and the *ZNF3* locus is indicated in each strain with a red arrowhead. Regions enlarged below illustrate Cn1 subtelomeric arrays on several chromosomes and depict examples of Cn1 array expansion (e.g. Chromosome 4, P18), contraction (e.g. Chromosome 1, P14), and invasion of naïve H99 subtelomeres (e.g. Chromosome 1, P8). Telomeric repeat sequences are indicated by black half circles only in the enlarged panels.

330 Surprisingly, the genome assemblies for the three progeny with the functional *ZNF3*  
331 allele inherited from H99 appear to encode more full-length Cn1 elements and fragments  
332 compared to the three *znf3* progeny. However, of the three *znf3* progeny, telomeric repeat

333 sequences were only identified at the end of two chromosomes (out of a possible 84 telomeric  
334 ends across the three progeny, 2/84 or 2%): on one arm of Chromosome 3 in P8 and one end of  
335 Chromosome 12 in P34 (Figure S12). This is in contrast to the 31 telomeres that were accurately  
336 assembled across the three *ZNF3* progeny (31/84 or 37%) (Figure S12). The smaller number of  
337 telomeres identified in the *znf3* progeny assemblies suggest there might be more Cnl1 elements  
338 that were not accurately included, similar to the assemblies for the hypermutators Bt65 and Bt81.  
339 Therefore, the Cnl1 burden quantified and presented in Table 1 might not accurately capture the  
340 entire Cnl1 burden of these strains.

341         A previous study found *ZNF3* to be a haploinsufficient gene because no progeny isolated  
342 from a *ZNF3* x *znf3* $\Delta$  cross showed evidence of sex-induced RNAi-mediated silencing<sup>32</sup>. This  
343 haploinsufficiency allowed us to analyze Cnl1 dynamics both hypermutator and non-  
344 hypermutator progeny and identified two additional phenomena. First, nearly all Cnl1 arrays in  
345 the progeny show signs of expansion and contraction relative to the Bt65 parental genome,  
346 suggesting these elements are either highly mobile during sexual reproduction, undergoing high  
347 levels of recombination, or both. Additionally, combined analysis of subtelomeric region  
348 inheritance patterns and Cnl1 arrays revealed Cnl1 elements are capable of invading naïve  
349 subtelomeric regions inherited from the H99 parent, i.e. regions that previously had no Cnl1  
350 elements/fragments (Figure 4, Figure S12). In the three *znf3* progeny, 65% (28/43) of the naïve  
351 telomeric regions inherited from H99 acquired Cnl1 copies and arrays in many cases. In the three  
352 *ZNF3* progeny, 81% (35/44) of naïve telomeric regions inherited from H99 now had Cnl1  
353 elements. Overall, both *ZNF3* and *znf3* F<sub>1</sub> progeny inherited roughly equivalent numbers of  
354 telomeric regions from either parent and Cnl1 invaded a majority of the naïve H99 telomeres.  
355

356 **Complementation of the nonsense mutation in *ZNF3* significantly lowers the mutation rate**  
357 **and restores production of siRNAs**

358 All of the available evidence thus far suggested the nonsense mutation in *ZNF3* unique to  
359 Bt65 and Bt81 is responsible for the hypermutation phenotype, possibly due to compromised  
360 RNAi silencing of Cnl1 elements. To test this hypothesis, we used CRISPR-mediated gene  
361 editing to restore the functional *ZNF3* allele in Bt65. Gene editing was achieved with the  
362 transient CRISPR-Cas9 coupled with electroporation (TRACE) system and the utilization of a  
363 functional *ZNF3* allele from a closely related strain, Bt133, such that only the SNP responsible  
364 for the nonsense mutation would be changed to the wild-type nucleotide (found in H99 and all  
365 SDC isolates except Bt65 and Bt81)<sup>48</sup>. Following transformation and selection, we identified two  
366 Bt65 transformants that had successfully integrated a single copy of the Bt133 *ZNF3* allele at the  
367 endogenous *znf3* locus, Bt65+*ZNF3*-1 and Bt65+*ZNF3*-2. These two independent Bt65+*ZNF3*  
368 transformants were subjected to fluctuation analysis to determine if changing the single SNP  
369 responsible for the *znf3* nonsense mutation restored the mutation rate to a wild-type level. On  
370 YPD + rapamycin + FK506 medium, both transformants had significantly lower mutation rates  
371 than Bt65, similar to those observed in H99 and Bt133 (Figure 5A).

372 We next sequenced the sRNA repertoires of the Bt65+*ZNF3* isolates as well as Bt65,  
373 Bt81, and an H99 *znf3*Δ mutant; H99 and an H99 *rdp1*Δ mutant served as positive and negative  
374 controls, respectively. Analysis of the size distribution of sRNAs aligning to the *C. neoformans*  
375 genome showed that Bt65, Bt81, and H99 *znf3*Δ displayed profiles similar to that of the  
376 canonical RNAi mutant H99 *rdp1*Δ because they lacked the characteristic siRNA peak at 21-24  
377 nt (Figure 5B). sRNA analysis also revealed that *ZNF3* complementation in Bt65 restored the 21-  
378 24 nt sRNA peak. We also characterized the 5' nucleotide identity of sRNAs of different lengths

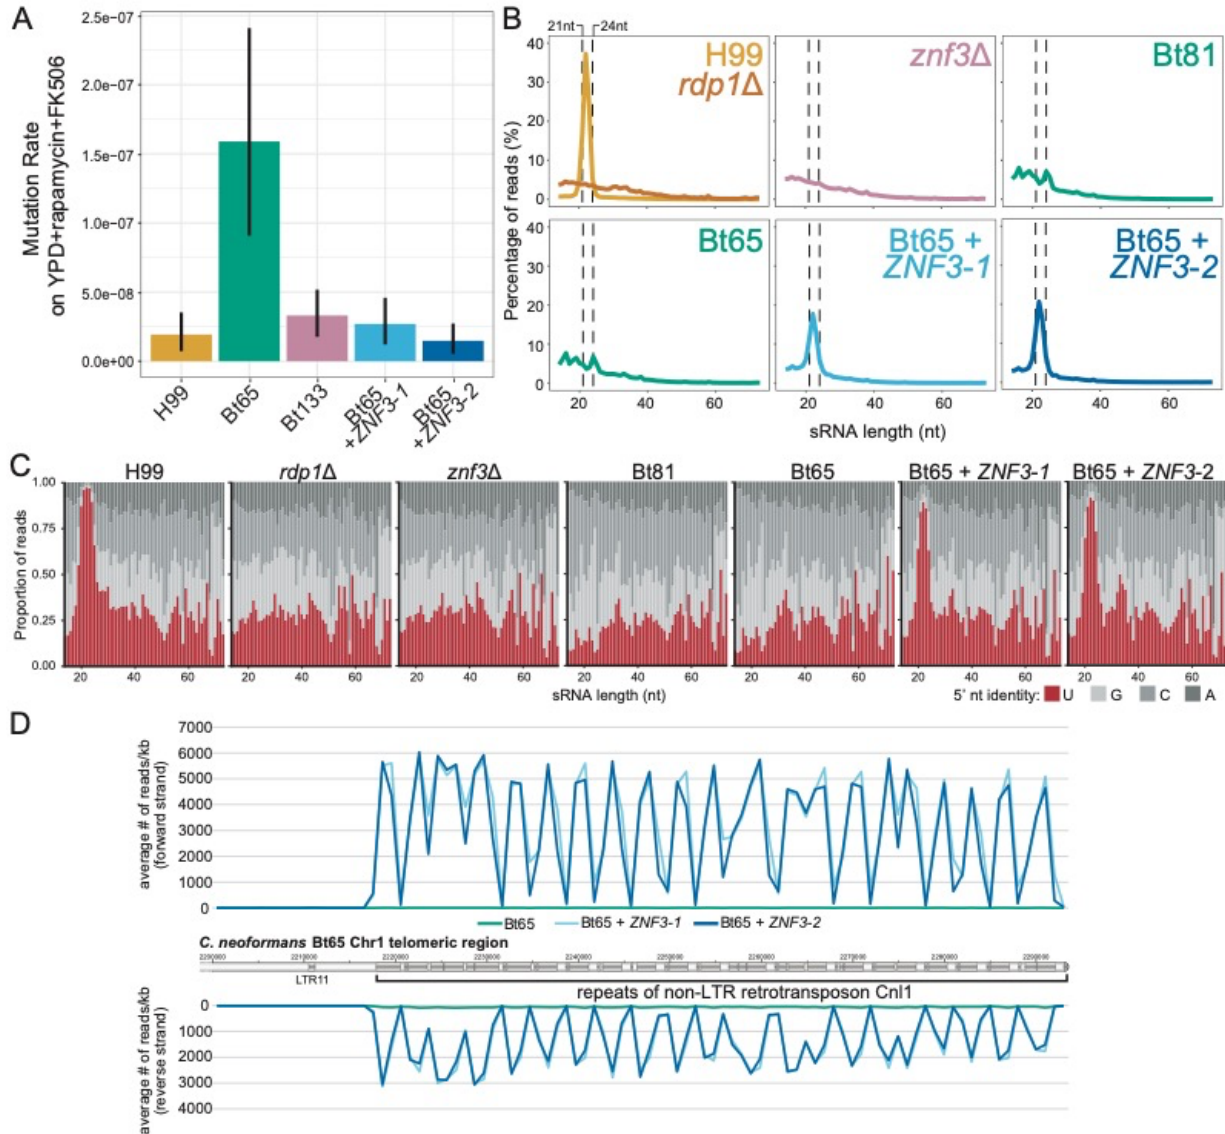

**Figure 5. *ZNF3* complementation in *Bt65* significantly reduces mutation rates and restores siRNA production.** (A) Mutation rates of H99, *Bt65*, *Bt133*, and the two independent *ZNF3* complementation mutants, *Bt65 + ZNF3-1* and *Bt65 + ZNF3-2*, on YPD + rapamycin + FK506 medium. Bars represent mutation rate (number of mutations per cell per generation) and error bars represent 95% confidence intervals. (B) Size distributions of sRNA reads from each indicated strain. Dashed vertical lines indicate the 21 to 24 nucleotide size range, the characteristic sizes of siRNAs produced by the RNAi pathway. (C) Proportion of sRNA reads (y-axis) with the indicated 5' nucleotide identity (color of stacked bar) at each sRNA read size (x-axis). siRNAs produced by the RNAi pathway characteristically have a 5' uracil nucleotide. (D) Quantification of sense and antisense sRNAs from *Bt65*, *Bt65 + ZNF3-1*, and *Bt65 + ZNF3-2* aligning to an array of subtelomeric *Cn1* elements on Chromosome 1 of *Bt65*. Transposable elements along the chromosome are indicated by dark grey boxes, while intergenic regions are light grey.

379 and found only H99 and the two *Bt65+ZNF3* transformants had a peak of 21-24 nt sRNAs with a

380 predominance for a 5' U, another characteristic of siRNAs produced by the RNAi pathway

381 (Figure 5C).

382 To determine how complementation of *ZNF3*, and thus restoration of RNAi, specifically  
383 impacted silencing of *Cnl1*, we quantified sRNAs aligning to *Cnl1* elements across the Bt65  
384 genome (Table S4). Relative to Bt65, the normalized expression of sRNAs corresponding to  
385 *Cnl1* were increased 5.6-fold in H99 (a strain with no full-length *Cnl1* elements and only 22  
386 *Cnl1* fragments), 10.6-fold in Bt65+*ZNF3-1*, and 12.8-fold in Bt65+*ZNF3-2* (Table S4). To  
387 demonstrate the marked difference in *Cnl1* sRNAs in the two Bt65+*ZNF3* transformants  
388 compared to Bt65, sRNAs were plotted along a telomeric *Cnl1* array on Chromosome 1 in Bt65  
389 (Figure 5D). These results suggest that changing the single nucleotide responsible for the  
390 nonsense mutation in *ZNF3* back to the wild-type nucleotide found in closely related strains as  
391 well as H99 was able to successfully restore RNAi in Bt65. This result also provides evidence  
392 that all other RNAi components have been largely maintained in a functional form despite the  
393 loss of RNAi activity in Bt65.

## 394 Discussion

395 Transposable element mobilization can alter gene expression, gene function, and even  
396 genomic stability. In this study, we identified two clinical, hypermutator isolates of *C.*  
397 *neoformans*, Bt65 and Bt81, with a massive accumulation of the non-LTR retrotransposon Cn11  
398 at all but one subtelomeric loci of all fourteen chromosomes. Furthermore, the Cn11 element was  
399 capable of inserting in non-subtelomeric regions of the genome, resulting in resistance to diverse  
400 classes of antifungal drugs. These findings were unprecedented as *C. neoformans* is thought to be  
401 an RNAi-proficient species<sup>13,49</sup>. Additionally, *C. neoformans* isolates were also thought to lack  
402 full-length copies of Cn11, and only the sister species *C. deneoformans* has been shown to harbor  
403 full-length Cn11 elements capable of mobilization<sup>13,27</sup>. These findings highlight the importance of  
404 intraspecific diversity at both the genotypic and phenotypic levels.

405 Following isolation, phenotyping, and genotyping of the Bt81a x H99α F<sub>1</sub> progeny, a  
406 significantly smaller number of progeny inherited the Bt81 *znf3* allele than expected. These  
407 results were surprising giving the approximately 1:1 inheritance pattern of the *ZNF3* allele from  
408 either parent in the Bt65a x H99α F<sub>1</sub> progeny. Based on long-read whole-genome sequencing,  
409 Bt81 likely has a substantially higher burden of Cn11 than Bt65. Previous studies have shown  
410 that expression of transposons, including Cn11, is significantly upregulated during sexual  
411 reproduction in RNAi mutants, such as H99 *znf3*Δ<sup>30,32-34</sup>. The higher Cn11 burden in Bt81  
412 combined with RNAi-deficiency and transposon upregulation during mating could lead to an  
413 increased frequency of deleterious Cn11 insertions in progeny lacking *znf3*, and thus a biased  
414 inheritance pattern of *ZNF3*. It is also possible that a higher Cn11 burden favored the selection of  
415 a suppressor mutation in the Bt81 F<sub>1</sub> progeny. Additionally, *znf3*Δ mutants are the only *C.*  
416 *neoformans* RNAi mutants studied thus far in which progeny from unilateral genetic crosses (i.e.

417 crosses in which only one parent lacks *ZNF3*) exhibit complete loss of RNAi-mediated  
418 silencing<sup>32</sup>, and thus loss of *ZNF3* results in haploinsufficiency. Overall, the unequal *znf3*  
419 inheritance patterns in Bt81 F<sub>1</sub> progeny indicate a sufficiently high burden of Cn11 elements may  
420 be deleterious during sexual reproduction.

421 In Bt65, QTL mapping and genetic complementation demonstrated the hypermutator  
422 phenotype was caused by a single SNP in the RNAi gene *ZNF3*. Changing the *znf3* nonsense  
423 mutation to the nucleotide found in the laboratory reference strain as well as phylogenetically  
424 closely related strains lowered the mutation rate to a wild-type level and restored RNAi function,  
425 including expression of siRNAs corresponding to Cn11, thus confirming the role of Znf3 in Cn11  
426 regulation. Although *ZNF3* complementation restored the mutation rate and siRNA production,  
427 the identified QTL which spans Chromosomes 3 and 11 accounted for only 64% of the  
428 hypermutator phenotype. This may suggest the existence of additional contributing loci of small  
429 effect, such as a mutation in another RNAi component that results in a partial loss of function,  
430 although the mapping population used here is under powered to detect such small-effect loci. It is  
431 also possible that variation in Cn11 burden across the F<sub>1</sub> progeny accounts for the remainder of  
432 the genetic loci that contribute to the hypermutator phenotype. However, because short-read  
433 sequencing data was utilized in variant calling, these Cn11 loci may have been difficult to map in  
434 the F<sub>1</sub> progeny or failed to pass quality criteria and were subsequently filtered out during  
435 preprocessing of the genetic data used in QTL analysis.

436 Despite having the wild-type nucleotide in the first exon of *ZNF3*, where Bt65 and Bt81  
437 have a nonsense mutation, both Bt89 and Bt133 (two of the most closely related strains) have a  
438 substantial accumulation of subtelomeric Cn11 arrays relative to the laboratory reference strain  
439 H99, which has none. The considerable Cn11 burden in Bt89 and Bt133 indicates that they may



440 descend from an ancestral strain that had lost RNAi function, but which was subsequently  
441 restored, such as through a genetic cross in which they inherited a wild-type *ZNF3* allele. The  
442 bias against *znf3* inheritance in Bt81 F<sub>1</sub> progeny and the lower but still impressive Cnl1 burden in  
443 Bt89 and Bt133 potentially illustrate a natural example of how *C. neoformans* genomes have  
444 struck a balance in their mutational capability, switching between high mutational capacities  
445 during times of RNAi loss, and genomic stability when RNAi is restored, all via one SNP in only  
446 one key RNAi gene. The expansion and contraction of Cnl1 arrays as well as the ability of Cnl1  
447 to invade naïve subtelomeric regions inherited from the H99 parent in the Bt65 F<sub>1</sub> progeny  
448 genomes was also exceptional. The observed Cnl1 subtelomeric dynamics mirror those observed  
449 for the MoTeR transposons of the fungal plant pathogen *Magnaporthe oryzae*, which were also  
450 recently shown to localize to highly dynamic subtelomeric arrays<sup>50</sup>. It is possible the Cnl1  
451 subtelomeric arrays identified here could eventually overcome the requirement for telomerase, as  
452 in the example of *Drosophila* telomeres, in which the functions of telomerase have been  
453 supplanted by a telomeric retrotransposon<sup>51,52</sup>.

454         The finding that only a single SNP rendered the RNAi pathway non-functional in Bt65,  
455 and that no additional obvious mutations had occurred in other genes that might disrupt RNAi  
456 function, suggest Bt65 represents an intermediate evolutionary stage and could illustrate the  
457 natural consequences of relatively recent RNAi loss. Further analysis of the consequences of  
458 RNAi loss in Bt65 (and potentially Bt81) through experimental evolution or gene regulation  
459 analyses could shed light on the short-term consequences of RNAi loss at the genomic and  
460 phenotypic levels. Bt65 could thus serve as an interesting intermediate comparator between  
461 RNAi-proficient *C. neoformans* isolates and the closely related RNAi-deficient species *C.*  
462 *deuterogattii*<sup>7,32</sup>. Instances of relatively recent loss of RNAi have also been observed in a natural

463 *Caenorhabditis elegans* isolate, which has a large deletion in a RIG-I homolog required for  
464 RNAi and was shown to be infected with an RNA virus<sup>53,54</sup>. Unlike the identified *C. elegans*  
465 virus-infected strain and several other RNAi-deficient fungal species, such as *Saccharomyces*  
466 *cerevisiae*, *Ustilago maydis*, and several *Malassezia* species, we were unable to identify a  
467 dsRNA virus in either of the two *C. neoformans* hypermutator strains identified here (see  
468 Materials and Methods)<sup>49,55</sup>. It is possible though, that the hypermutators harbor other types of  
469 mycoviruses (ssRNA, for example) that we were unable to detect through our approaches or that  
470 the mycovirus was cured by common microbiological isolation practices<sup>55</sup>.

471 The identification of this hypermutator phenotype in natural *C. neoformans* clinical  
472 isolates has important implications for antifungal drug resistance and potentially other adaptive  
473 consequences. Here, we showed Cnl1 insertion could confer resistance to diverse classes of  
474 antifungal drugs, including the clinically relevant antifungal 5-FC. Insertion of Cnl1 into other  
475 genes, particularly those involved in the sterol biosynthesis pathway, could confer resistance to  
476 amphotericin B and fluconazole, the only other antifungal drugs effective for *C. neoformans*  
477 treatment<sup>23,56</sup>. This mechanism of drug resistance also has interesting implications for a novel  
478 antifungal approach that utilizes dsRNA to initiate RNAi silencing in fungal plant pathogens<sup>57</sup>.  
479 The effects of Cnl1 insertion at non-coding loci, such as promoters and 3' untranslated regions,  
480 could also impact overall genomic stability or alter gene expression to have important  
481 phenotypic implications for virulence, similar to the effects of the *Ac/Ds* elements of maize, the  
482 first transposable elements discovered<sup>58</sup>. Alterations in gene expression might also confer  
483 resistance to drugs for which resistance cannot be gained through loss of function mutations.  
484 Even if full resistance isn't acquired, altered gene expression could contribute to antifungal drug

485 tolerance, like the tolerance observed in *Candida albicans*, which contributes to persistent  
486 infections in immunocompetent patients<sup>59,60</sup>.

487         At this stage it is difficult to know how Cn11 transposition and accumulation may be  
488 selected for or against over time. The subtelomeric arrays identified in Bt65 and Bt81 may  
489 undergo cycles of amplification and recombination-mediated contraction allowing them to  
490 exploit Cn11 mutagenesis when under stress, similar to the retrotransposons replication cycles  
491 observed in some plants<sup>61,62</sup>. Maintaining an RNAi-deficient background could also be adaptive  
492 in the context of viral infection, as has been shown in yeast harboring the killer virus, which  
493 outcompete neighboring uninfected strains, and in mice harboring latent herpesvirus, which are  
494 protected from the bacterial pathogens *Listeria monocytogenes* and *Yersinia pestis*<sup>63,64</sup>.

495 Conversely, the mutational impact of Cn11 mobilization could be highly deleterious over the long  
496 term and therefore may not represent a massive contributor to the rise of drug resistance. Natural  
497 selection could either select for reversion to a functional RNAi-pathway through mutation of the  
498 *znf3* nonsense mutation or instead preserve loss of RNAi and eliminate all full-length  
499 transposable elements, as has been observed in *C. deuterogattii*<sup>28</sup>. Future research on the  
500 potential for Cn11 insertion to mediate resistance to amphotericin B and fluconazole, and the  
501 impact of hypermutation due to Cn11 mobilization on *in vivo* drug resistance, adaptive potential,  
502 and genomic stability over time will be of great interest.

503

## 504 **Materials and Methods**

### 505 **Strains and growth**

506           The *C. neoformans* strains described in this study are listed in Table S5. Strains were  
507 stored at -80°C in liquid yeast extract peptone dextrose (YPD) supplemented with 15% glycerol.  
508 Strains were inoculated on YPD agar plates, grown for three days at 30°C, and maintained at  
509 4°C. Due to the hypermutator phenotypes associated with several of the strains in this study,  
510 strains were not maintained on YPD agar plates for routine use for more than two weeks; fresh  
511 cells from frozen glycerol stocks were inoculated to YPD agar plates as needed.

512

### 513 **Screening for hypermutator candidates**

514           Assays for the emergence of resistance (papillation assays) were conducted as previously  
515 described<sup>65</sup>. In brief, ten independent overnights per strain were grown overnight at standard  
516 laboratory conditions in 5mL liquid YPD medium. Cultures were then spun down, washed, and  
517 concentrated in 2 mL dH<sub>2</sub>O. Each culture was swabbed to a quadrant of either YPD + 100 ng/mL  
518 rapamycin + 1 µg/mL FK506 agar medium or YNB + 100 µg/mL 5-fluorocytosine agar medium.  
519 YPD + rapamycin + FK506 plates and YNB + 5-fluorocytosine plates were incubated for up to  
520 seven days at 37°C and 30°C, respectively. Fisher's exact probability test was used to determine  
521 if the associations environmental isolates and the hypermutator phenotype was statistically  
522 significant using the VassarStats online software (<http://vassarstats.net>).

523

### 524 **Fluctuation assays**

525           Fluctuation assays were conducted as previously described<sup>65</sup>. Briefly, ten independent  
526 overnights of each strain were grown overnight in 5 mL liquid YPD medium at 30°C. Cultures

527 were washed three times and resuspended in dH<sub>2</sub>O. Cells were then plated to the appropriate  
528 medium (100 μL 10<sup>-5</sup> cells on YPD, 100 μL 10<sup>-2</sup> cells on YNB + 5-FC, and 100 μL undiluted  
529 cells on YPD + rapamycin + FK506 and YNB + 5-FOA). Mutation rates and 95% confidence  
530 intervals were calculated using the FluCalc program<sup>66</sup>. For the increased temperature fluctuation  
531 analysis, strains were grown overnight at either 30°C or 37°C before use in fluctuation assays, as  
532 indicated. YPD + rapamycin + FK506 plates were incubated and 37°C; all other media was  
533 incubated at 30°C. Mutation rates and confidence intervals for all fluctuation assays in this study  
534 are provided in Table S6.

535

### 536 **Characterizing mutation spectra**

537       Following selection on antifungal drug media, resistant colonies were streak purified to  
538 YPD medium. Genomic DNA was isolated from the purified colonies, and genes in which  
539 mutations are known to cause resistance to the corresponding antifungal drug were PCR  
540 amplified (*URA5* and *URA3* for 5-FOA-resistant colonies<sup>44,45</sup>, *FRR1* for rapamycin+FK506-  
541 resistant colonies<sup>41,42</sup>, and *FUR1*, and *UXS1* for 5-FC-resistant colonies<sup>46</sup>). Oligonucleotides used  
542 for all PCR reactions in this study are listed in Table S7. PCR products were subjected to gel  
543 electrophoresis, products of interest were extracted from agarose gels using a QIAgen gel  
544 extraction kit and sequenced through classical Sanger sequencing conducted at Genewiz.  
545 Sequenced mutations, including transposon insertions, were characterized with both Sequencher  
546 software and the Clustal Omega Multiple Sequence Alignment program<sup>67</sup>. Identified transposon  
547 insertion sequences in *FRR1*, *URA5*, and *FUR1* are listed in Table S8.

548

549

550 **Illumina sequencing**

551 Single colonies from strains for whole-genome Illumina sequencing were inoculated in  
552 50 mL of liquid YPD medium and grown overnight at 30°C, shaking. Cells were collected and  
553 lyophilized as previously described<sup>65</sup>, and high molecular weight DNA was isolated following  
554 the CTAB protocol as previously described<sup>68</sup>. Strains were barcoded and sequencing libraries  
555 were generated with the Kapa HyperPlus library kit for 300bp inserts, pooled, and sequenced  
556 using paired-end, 2 x 150bp reads on an Illumina HiSeq 4000 platform at the Duke University  
557 Sequencing and Genomic Technologies Core facility.

558

559 **Generation of F<sub>1</sub> progeny**

560 Bt65a x H99α *crg1*Δ and Bt81a x H99α *crg1*Δ F<sub>1</sub> progeny were generated by genetically  
561 crossing either Bt65 or Bt81 with H99 *crg1*Δ on Murashige Skoog (MS) medium (Sigma)  
562 following Basic Protocol 1 as described in Sun et al. 2019<sup>69</sup>. Basidiospores were randomly  
563 isolated through microdissection after three weeks of incubation on MS following Basic Protocol  
564 2 as described in Sun et al. 2019<sup>69</sup>.

565

566 **Nanopore sequencing and genome assemblies**

567 The DNA samples for nanopore sequencing were isolated and purified using the CTAB  
568 DNA preparation protocol described previously<sup>70</sup>. The size estimation of the obtained DNA was  
569 done using PFGE electrophoresis and quality was determined using NanoDrop. Once the high-  
570 quality DNA was obtained, sequencing was performed using the MinION device with the  
571 MinKNOW interface. During sequencing, Bt65, Bt89, and Bt133 were multiplexed together  
572 whereas six of the Bt65a x H99α progeny were multiplexed for a second sequencing run. For

573 multiplexing, samples were barcoded using EXP-NBD103/EXP-NBD104 kits and libraries were  
574 made using SQK-LSK109 kit as per the manufacturer's instructions. The libraries generated  
575 were sequenced on R9.4.1 flow cell and reads were obtained in .fast5 format. These reads were  
576 then converted to fastq format using Guppy\_basecaller (v 4.2.2\_linux64). The reads were de-  
577 multiplexed using qcat (<https://github.com/nanoporetech/qcat>) or Guppy\_barcode (part of  
578 Guppy\_basecaller) with barcode trimming option during processing. Bt81 nanopore sequencing  
579 was done as a standalone sample using an R9 flow cell (FLO-MN106) and basecalling was  
580 performed during the run itself.

581         The sequences obtained for each sample were then assembled via Canu (v2.0 or v2.1.1)  
582 to obtain contig-level genome assemblies. For the assembly, only >2 kb long reads were used for  
583 the Bt65a x H99 $\alpha$  F<sub>1</sub> progeny and Bt81, whereas >5 kb were used for Bt65, Bt89, and Bt133  
584 genomes. Contigs were then assigned chromosome numbers based on their synteny with the  
585 reference genome, H99. The numbering of chromosomes involved in translocations was assigned  
586 based on the respective syntenic centromere. Some of the chromosomes were not fully  
587 assembled and were broken into multiple contigs (Chr 1, Chr 2 for Bt65, Chr 2, Chr11, Chr14 for  
588 Bt89, and Chr 2, Chr 5 for Bt133). For such cases, the respective contigs were joined artificially  
589 and then processed by read-mapping to obtain complete collinear chromosomes. Specifically, the  
590 contigs were stitched together in orientation as determined based on their synteny. Corrected  
591 reads obtained from Canu were then mapped to the respective genomes and duplicated or  
592 missing regions from the junction were identified. The chromosome sequence was then corrected  
593 accordingly by inserting/correcting/deleting sequences and a full-length chromosome sequence  
594 was obtained. Complete resolution of junctions was obtained for Bt65, Bt89, and Bt133 genomes

595 by this approach. However, some of the Bt65 F<sub>1</sub> progeny chromosomes could not be resolved,  
596 probably due to hybrid origin of sequencing reads, and were left with gaps as such.

597       Once chromosome level genome assemblies were obtained for the Bt65, Bt81, Bt89, and  
598 Bt133 genomes, the genome sequences were further processed to improve telomeric and  
599 subtelomeric regions. For this purpose, the corrected reads obtained from Canu were mapped  
600 back to the respective chromosome-level genomes using minimap2 v2.14. The obtained bam  
601 files were then analyzed manually by IGV and consensus or, in a few cases, individual reads (up  
602 to 30 kb) representing extra sequence beyond an assembled chromosome were extracted as sam  
603 files. These consensus extra sequences were then added onto the chromosome sequences to  
604 obtain longer chromosomes. In some cases, read mapping also resulted in the identification of  
605 incorrect sequence assembly at subtelomeric regions, and in those cases, the sequence was  
606 trimmed until a consensus sequence was observed at the end of the chromosome. Once these  
607 corrections were made, the genome assemblies were polished via one round of nanopolish and  
608 five rounds of pilon, except for the Bt81 genome, for which only 5X pilon polishing was  
609 performed. As a result of these corrections and polishing, final assemblies were obtained for each  
610 of the four isolates and are described in the study. For the Bt65 F<sub>1</sub> progeny genome assemblies,  
611 the subtelomeric extension/curation was not performed, but they were polished using both  
612 nanopolish and 5X pilon.

613

#### 614 **Centromere, telomere, and Cnl1 mapping**

615       Centromeres in Bt65, Bt81, Bt89, and Bt133 were defined based on their synteny with  
616 the reference H99 genome (genome assembly ASM301198v1) The final polished genomes were  
617 used and centromere locations were identified by BLASTn analysis using H99 centromere-



618 flanking genes as query sequences. Once the centromere locations were defined, Tcn1-Tcn6  
619 locations within those regions were mapped by BLASTn analysis. For the representation, only  
620 BLAST hits longer than 400 bp were mapped. For the overlapping BLAST hits with multiple  
621 Tcn elements, the longest and best BLAST result was used, and the rest of the matches were  
622 discarded from further analysis. All the hits were then visualized using Geneious Prime and  
623 maps were exported as .svg files, which were then processed using Adobe Illustrator.

624 For the Cnl1 mapping at the subtelomeres, the longest *CNLI* insertion sequence from the  
625 Bt65 genome was used as the query sequence and BLASTn was performed against each genome.  
626 BLAST hits longer than 50 bp were mapped to the respective genomes and visualized using  
627 Geneious Prime where the hits were color-coded based on their lengths. The zoomed views for  
628 these maps were then exported as .svg files, processed using Adobe Illustrator, and combined  
629 with centromere Tcn mapping analysis to generate final figures.

630 RepeatMasker was used to annotate all transposons in the *de novo* genome assembly of  
631 Bt65. For this purpose, RepeatMasker (v4.0.7) with Dfam (v3.3) and  
632 RepBaseRepeatMaskerEdition-20181026 libraries was used, supplemented with RepBase EMBL  
633 database (v26.04)<sup>71-73</sup>. The “-species fungi” option was used to identify all repeats in the genome  
634 and provided additional support for the manual Tcn and Cnl1 mapping.

635

### 636 **Synteny maps**

637 Synteny comparisons between the genomes were performed using SyMAP v4.2 with the  
638 H99 genome as the reference (genome assembly ASM301198v1). The synteny comparison was  
639 conducted using default parameters and synteny block maps were exported as .svg files. The  
640 maps were processed using Adobe Illustrator for visualization. The phylogenetic relationship as

641 depicted in Figure S6 was drawn based on the earlier representation<sup>18</sup>. The telomere and  
642 centromere locations were marked manually based on the presence of the telomere repeat  
643 sequence and Tcn mapping, respectively.

644 For the centromere comparisons, all centromere sequences along with Tcn annotations  
645 were converted into GenBank format. The files were then used for synteny comparison via  
646 EasyFig v2.2.3. The maps were exported as .svg files which were processed in Adobe Illustrator.

647

#### 648 **Recombination maps for Bt65 x H99 F<sub>1</sub> progeny**

649 Six of the Bt65 $\alpha$  x H99 $\alpha$  F<sub>1</sub> progeny were sequenced with on the nanopore MinION  
650 sequencing platform and their genomes were assembled and polished using the methods  
651 described above. Once their genomes were assembled, recombination maps were generated by  
652 mapping the Illumina sequence data from the parental strains to each of the progeny genomes.  
653 For this purpose, both H99 and Bt65 Illumina reads were used from published datasets  
654 (SRR642222 and SRR647805 for H99; SRR836876, SRR836877, SRR836878, SRR836880,  
655 SRR836884, and SRR836885 for Bt65). Reads from all runs were merged to obtain a single file  
656 for both H99 and Bt65. The reads were then mapped to the progeny genomes using Geneious  
657 Prime default mapper with three iterations. Variants with 90X coverage and at least 90% variant  
658 frequency were called from these mapped files. These variants along with coverage analysis  
659 were then used to identify recombination sites and generate recombination maps. Cnl1 mapping  
660 for each of progeny genome was performed as described above. The location of *ZNF3* in each  
661 genome was identified by BLASTn analysis using H99 *ZNF3* (CNAG\_02700) as the query  
662 sequence.

663

## 664 **Genetic variant calling and segregant filtering**

665 Whole-genome sequencing data of 28 F<sub>1</sub> progeny from the Bt65a x H99a *crg1*Δ cross  
666 were aligned via BWA (v0.7.12-r1039)<sup>74</sup> to an H99 reference genome (downloaded from  
667 FungiDB [<http://fungidb.org/fungidb/>] on April 15<sup>th</sup>, 2020; FungiDB-  
668 46\_CneoformansH99\_Genome.fasta) and genetic variants between Bt65 and H99 were called  
669 using SAMtools (v0.1.19-96b5f22941)<sup>75</sup> and FreeBayes (v1.2.0)<sup>76</sup>. Approximately 300,000 raw  
670 genetic variants were identified across the segregants. The genotypic correlation between  
671 progeny, the read coverage per genetic variant, and the ratio of reads suggesting the H99 vs.  
672 Bt65 allele per variant were monitored across the genome to identify clones, progeny with  
673 aneuploid genomes, and heterozygotic diploids (respectively). Two pairs of clones were  
674 identified (Supplementary Table S9) and one segregant from each pair was retained for analysis.  
675 F<sub>1</sub> progeny 25 was identified as a heterozygotic diploid (Supplementary Figure S13) and  
676 removed from initial analysis. Instances of aneuploidy (and partial duplications) are observed  
677 along Chromosomes 3, 4, 11, and 13 within six segregants from this cross and for initial filtering  
678 and analysis, those with heterozygotic aneuploidy were removed from analysis (Supplementary  
679 Table S9).

680

## 681 **Genetic variant filtering**

682 After removing clones and samples with aneuploidy or diploidy, raw genetic variants  
683 were filtered by limiting sites to bi-allelic SNPs, called across all the progeny (100% call rate),  
684 with greater than 10X read coverage (and a maximum of 200X), a minor allele frequency of 5%,  
685 and a quality score greater than 4 (and less than 5.4). These filtering criteria were selected after  
686 examining the bivariate relationships between allele frequency, read depth, and quality scores per

687 chromosome (Supplementary Figure S14A and 14B). Genetic variant sites were also removed if  
688 within one kb of the centromere along a given chromosome<sup>28</sup>. After filtering, a total of 215,411  
689 bi-allelic SNPs were retained for further analysis. The median distance between contiguous SNP  
690 sites is 45 bp, and less than 0.01% of neighboring sites had a distance larger than two kb. The  
691 allele frequencies across the genome ranged between 25 and 75% of segregant with the Bt65  
692 allele, except for a large portion of Chromosome 13, between 0 to 500 kb, where over 88% of  
693 segregants inherited the Bt65 allele (Figure S14C). With these data, a Poisson regression  
694 (methods described in Roth *et al.* 2018<sup>77</sup>) was used to relate the average number of crossovers  
695 across F<sub>1</sub> progeny as a function of chromosome size. With this model, the estimated genome-  
696 wide, physical-to-genetic distance in this cross is 8.14 kb/cM.

697

## 698 **QTL mapping**

699 For use in association tests, across 24 F<sub>1</sub> progeny and the two parental strains, the  
700 215,411 bi-allelic SNPs were collapsed into 1,237 unique haplogroups made up of genetic  
701 variants sites that co-segregated within the segregant genomes, such that, between any two  
702 haplogroups, at least one segregant contains a change in allele (i.e. a recombination event  
703 between the Bt65a and H99a *crg1*Δ genomes). Collapsing genetic variants into haplogroups  
704 reduces the number of repeated tests in association mapping and computational costs<sup>78</sup>. Across  
705 the 1,237 haplogroups, the mutation rate on rapamycin + FK506 medium was used as the  
706 phenotype and tested for association using a Kruskal-Wallis H-test. The  $-\log_{10}$  (*p*-value) from  
707 this test across haplogroups was monitored to identify QTL. Significance thresholds were  
708 established via 10,000 permutations with an  $\alpha = 0.01$  as described in Churchill and Doerge  
709 (1994)<sup>79</sup>, and 95% confidence intervals for the QTL locations were generated as described in

710 Visscher *et al.* (1996)<sup>80</sup>. The heritability at the peak of identified QTL was estimated using linear  
711 regression with the model:  $M = \mu + \beta I + e$ , where  $M$  is the mutation rate  $\times 10^7$ ,  $e$  is an error term,  $\mu$   
712 is the mean mutation rate  $\times 10^7$ ,  $I$  is an indicator variable for the allele at the QTL peak – coded  
713 as 0 if from H99 $\alpha$  *crg1* $\Delta$  or 1 if from Bt65 $\alpha$  – and  $\beta$  is the effect of having the H99 $\alpha$  *crg1* $\Delta$  vs.  
714 the Bt65 $\alpha$  allele at the QTL. The variation explained ( $R^2$ ) from this model was used as an  
715 estimate of the heritability.

716

### 717 **Gene annotation and SNP effect prediction**

718 For genes within the identified QTL spanning Chromosomes 3 and 11, the alleles  
719 between H99 and Bt65 were imputed using filtered SNP data (described above). The published  
720 H99 reference strain annotation (downloaded from FungiDB [<http://fungidb.org/fungidb/>] on  
721 April 15<sup>th</sup>, 2020; FungiDB-46\_CneoformansH99.gff) was used to predict changes in protein  
722 sequence between the H99 and Bt65 parental backgrounds.

723

### 724 **CRISPR-mediated genetic complementation of *ZNF3* in Bt65**

725 To change the single nucleotide responsible for the nonsense mutation in the first exon of  
726 *ZNF3*, a thymine (base 976004 of H99 Chromosome 3 (CNA3 assembly, accession  
727 GCA\_000149245.3)), to the wild-type cytosine found in H99 and other phylogenetically closely  
728 related strains, the Transient CRISPR-Cas9 Coupled with Electroporation (TRACE) system was  
729 used<sup>48</sup>. Briefly, the gene encoding Cas9 was PCR amplified from plasmid pXL1-CAS9-HYG.  
730 The *SHI-NEO* construct encoding *NEO* (G418 resistance) targeted to a safe haven locus (SH1)  
731 was amplified from plasmid pSDMA57<sup>81</sup>. For the sgRNA expression construct, the U6 promoter  
732 was amplified from XL280 $\alpha$  gDNA, and the sgRNA scaffold was amplified from plasmid

733 pYF515<sup>82</sup>. Overlap PCR was used to generate the sgRNA construct with the U6 promoter and  
734 sequences targeting either SH1 or the nonsense mutation in *ZNF3*. A 2,171bp region was  
735 amplified from Bt133, containing the wild-type C nucleotide in *ZNF3* exon 1 and no other  
736 mutations relative to Bt65 for integration at the *ZNF3* endogenous locus in Bt65 (1,197bp  
737 upstream of the *ZNF3* start codon to 971bp after the start codon). The *SHI-NEO* construct was  
738 linearized with the *AscI* restriction enzyme (NEB). 2µg of the Bt133 *ZNF3* recombination  
739 template, 2µg of the *SHI-NEO* linearized construct, 250ng of the *ZNF3* gRNA, 250ng of the  
740 SH1 gRNA, and 1.5µg of Cas9 DNA were transformed simultaneously into Bt65 via  
741 electroporation using a BIO-RAD Gene Pulser.

742       Transformants were selected on YPD + G418 agar plates. Successful transformants were  
743 identified through restriction enzyme digest with *BtsI-v2* (NEB), which cleaves the first exon of  
744 Bt65 *znf3* at the nonsense mutation but does not cleave the first exon of *ZNF3* in Bt133 (or H99)  
745 (Figure S15A). PCR was also used to ensure that no transformants had integrated copies of the  
746 gene encoding Cas9 or the gRNA constructs and that only a single Bt133 *ZNF3* allele had  
747 integrated correctly at the endogenous *znf3* locus (Figure S15B-F). Sanger sequencing was used  
748 to further confirm correct replacement of the Bt65 *znf3* allele including the nonsense mutation  
749 with the Bt133 *ZNF3* allele. No identified Bt65+*ZNF3* transformants also had a stably integrated  
750 copy of the *NEO* gene at the safe haven locus.

751

## 752 **sRNA isolation and sequencing**

753       *C. neoformans* cells were grown overnight in 50 mL YPD medium at standard laboratory  
754 conditions. Following culture, cells were spun down, supernatant was removed, and cells were  
755 frozen at -80°C for one hour. Cells were then freeze dried with a Labconco Freezone 4.5

756 lyophilizer overnight. 70 mg of lyophilized material was used for sRNA isolation following the  
757 mirVana miRNA Isolation Kit manufacturer's instructions. sRNA was quantified with a Qubit 3  
758 Fluorometer and quality was verified with an Agilent Bioanalyzer using an Agilent Small RNA  
759 Kit. sRNA libraries were prepared with a QiaPrep miRNA Library Prep Kit and 1 x 75 bp reads  
760 were sequenced on the Illumina NextSeq 500 System at the Duke University Sequencing and  
761 Genomic Technologies Core facility.

762

### 763 **sRNA data processing**

764 Initial quality control of the small RNA libraries was performed with FastQC 0.11.9<sup>83</sup>  
765 followed by the removal of QIAseq library adapters (5':  
766 GTTCAGAGTTCTACAGTCCGACGATC; 3': AACTGTAGGCACCATCAAT) with cutadapt  
767 2.8<sup>84</sup>. All untrimmed reads or reads smaller than 14 nt were discarded. The surviving trimmed  
768 reads were mapped with bowtie v1.2.3<sup>85</sup> to the *C. neoformans* Bt65 genome, allowing multiple  
769 alignments but no mismatches. The resulting SAM files were converted into BAM file format  
770 with SAMtools 1.9<sup>75</sup> and feature read counts of transposable elements were calculated with  
771 BEDTools<sup>86</sup> using the 'intersect -wa' option and the annotations of transposable elements, which  
772 were identified with RepeatMasker using the rebase database for *C. neoformans*<sup>71,72</sup>.  
773 Normalization of the read counts to reads per million (RPM) was performed, allowing the  
774 comparison of the libraries. Furthermore, the read depth on both DNA strands was analyzed with  
775 SAMtools and custom made perl scripts were used to calculate the read size distribution and 5'-  
776 nucleotide preference of the small RNA reads as previously described<sup>87,88</sup>.

777

### 778 **Double-stranded RNA enrichment**

779 For dsRNA enrichment, *Cryptococcus* cells were grown overnight in 50mL liquid YPD  
780 medium at 30°C. RNA was extracted, and dsRNA was enriched as previously described<sup>55</sup>.  
781 dsRNA enrichment in H99, Bt65, and Bt81 did not reveal the presence of any large dsRNA  
782 segments (Figure S16).

783

#### 784 **Data and software availability**

785 Genetic variant filtering, QTL mapping, and SNP effect prediction was conducted in  
786 python (anaconda 3.7.3) via custom scripts; hosted at:  
787 [https://github.com/magwenelab/Hypermutator\\_QTL](https://github.com/magwenelab/Hypermutator_QTL) . All sequencing data is available under  
788 BioProject PRJNA749953.

789

#### 790 **Acknowledgments**

791 We thank and acknowledge Blake Billmyre for initial project guidance, Shelly Clancey  
792 for instruction in conducting fluctuation assays and dsRNA enrichment protocols, Josh Granek  
793 for preliminary analyses of hypermutator genomes, Zanetta Chang for assistance in sRNA  
794 isolation, Kayla Sylvester for assistance with screening of SDC isolates, and the laboratory of  
795 Chris Holley at Duke University for the use of their Nanodrop and BioAnalyzer equipment for  
796 preliminary sRNA analysis. We thank Mark Farman and Mostafa Rahnama for stimulating  
797 discussion on the impacts of transposons on telomere dynamics. We thank Kevin Zhu for  
798 assistance with figure generation. We also thank Sheng Sun, Blake Billmyre, Andy Alspaugh,  
799 Sue Jinks-Robertson, Asiya Gusa, and Kayla Sylvester for critical reading and comments on the  
800 manuscript. This work was funded by NIH/NIAID F31 Fellowship 1F31AI143136-02A1  
801 awarded to S.J.P. and NIH/NIAID R37 MERIT award AI39115-23, R01 grant AI50113-16, and



802 R01 grant AI33654-04 awarded to J.H. J.H. is co-Director and Fellow of the CIFAR program  
803 Fungal Kingdom: Threats & Opportunities. We also thank the Madhani Laboratory and NIH  
804 grant R01 AI100272 for the KN99 $\alpha$  *msh2* $\Delta$  deletion strain. T.A.D. and U.K. are funded by the  
805 German Research Foundation (DFG) (Bonn Bad-Godesberg, Germany) (KU 517/15-1).

806 **References**

- 807 1. Sniegowski, P. D., Gerrish, P. J. & Lenski, R. E. Evolution of high mutation rates in  
808 experimental populations of *E. coli*. *Nature* **387**, 703–705 (1997).
- 809 2. Barrick, J. *et al.* Genome evolution and adaptation in a long-term experiment with  
810 *Escherichia coli*. *Nature* **461**, 1243–1247 (2009).
- 811 3. Tenaillon, O. *et al.* Tempo and mode of genome evolution in a 50,000-generation  
812 experiment. *Nature* **536**, 165–170 (2016).
- 813 4. Harfe, B. D. & Jinks-Robertson, S. Mismatch repair proteins and mitotic genome stability.  
814 *Mutat. Res.* **451**, 151–167 (2000).
- 815 5. Fisher, K. J., Buskirk, S. W., Vignogna, R. C., Marad, D. A. & Lang, G. I. Adaptive  
816 genome duplication affects patterns of molecular evolution in *Saccharomyces cerevisiae*.  
817 *PLoS Genet.* **14**, e1007396 (2018).
- 818 6. Billmyre, R. B., Croll, D. & Li, W. Highly recombinant VGII *Cryptococcus gattii*  
819 population develops clonal outbreak clusters through both sexual macroevolution and  
820 asexual microevolution. *mBio* **5**, e01494-14 (2014).
- 821 7. Billmyre, R. B., Clancey, S. A. & Heitman, J. Natural mismatch repair mutations mediate  
822 phenotypic diversity and drug resistance in *Cryptococcus deuterogattii*. *eLife* **6**, e28802  
823 (2017).
- 824 8. Healey, K. R. *et al.* Prevalent mutator genotype identified in fungal pathogen *Candida*  
825 *glabrata* promotes multi-drug resistance. *Nat. Commun.* **7**, 11128 (2016).
- 826 9. Boyce, K. J. *et al.* Mismatch repair of DNA replication errors contributes to  
827 microevolution in the pathogenic fungus *Cryptococcus neoformans*. *mBio* **8**, e00595-17  
828 (2017).

- 829 10. Steenwyk, J. L. *et al.* Extensive loss of cell-cycle and DNA repair genes in an ancient  
830 lineage of bipolar budding yeasts. *PLoS Biol.* **17**, e3000255 (2019).
- 831 11. Sionov, E., Lee, H., Chang, Y. C. & Kwon-Chung, K. J. *Cryptococcus neoformans*  
832 overcomes stress of azole drugs by formation of disomy in specific multiple  
833 chromosomes. *PLoS Pathog.* **6**, e1000848 (2010).
- 834 12. Kwon-Chung, K. J. & Chang, Y. C. Aneuploidy and drug resistance in pathogenic fungi.  
835 *PLoS Pathog.* **8**, 8–11 (2012).
- 836 13. Janbon, G. *et al.* Characterizing the role of RNA silencing components in *Cryptococcus*  
837 *neoformans*. *Fungal Genet. Biol.* **47**, 1070–1080 (2010).
- 838 14. Gusa, A. *et al.* Transposon mobilization in the human fungal pathogen *Cryptococcus* is  
839 mutagenic during infection and promotes drug resistance *in vitro*. *Proc. Natl. Acad. Sci.*  
840 *U. S. A.* **117**, 9973–9980 (2020).
- 841 15. Idnurm, A. *et al.* Deciphering the model pathogenic fungus *Cryptococcus neoformans*.  
842 *Nat. Rev. Microbiol.* **3**, 753–764 (2005).
- 843 16. Chayakulkeeree, M. & Perfect, J. R. Cryptococcosis. *Infect. Dis. Clin. North Am.* **20**, 507–  
844 544 (2006).
- 845 17. Hagen, F. *et al.* Recognition of seven species in the *Cryptococcus gattii/Cryptococcus*  
846 *neoformans* species complex. *Fungal Genet. Biol.* **78**, 16–48 (2015).
- 847 18. Desjardins, C. A. *et al.* Population genomics and the evolution of virulence in the fungal  
848 pathogen *Cryptococcus neoformans*. *Genome Res.* **27**, 1207–1219 (2017).
- 849 19. Rajasingham, R. *et al.* Global burden of disease of HIV-associated cryptococcal  
850 meningitis: an updated analysis. *Lancet Infect. Dis.* **17**, 873–881 (2017).
- 851 20. Brouwer, A. *et al.* Combination antifungal therapies for HIV-associated cryptococcal

- 852 meningitis: a randomised trial. *Lancet* **363**, 1764–1767 (2004).
- 853 21. Laniado-Laborín, R. & Cabrales-Vargas, M. N. Amphotericin B: side effects and toxicity.  
854 *Rev. Iberoam. Micol.* **26**, 223–227 (2009).
- 855 22. Vandeputte, P. *et al.* Molecular mechanisms of resistance to 5-fluorocytosine in laboratory  
856 mutants of *Candida glabrata*. *Mycopathologia* **171**, 11–21 (2011).
- 857 23. Perfect, J. R. & Cox, G. M. Drug resistance in *Cryptococcus neoformans*. *Drug Resist.*  
858 *Updat.* **2**, 259–269 (1999).
- 859 24. Nosanchuk, J. D., Cleare, W., Franzot, S. P. & Casadevall, A. Amphotericin B and  
860 fluconazole affect cellular charge, macrophage phagocytosis, and cellular morphology of  
861 *Cryptococcus neoformans* at subinhibitory concentrations. *Antimicrob. Agents Chemother.*  
862 **43**, 233–239 (1999).
- 863 25. Posteraro, B. *et al.* Identification and characterization of a *Cryptococcus neoformans* ATP  
864 binding cassette (ABC) transporter-encoding gene, *CnAFRI*, involved in the resistance to  
865 fluconazole. *Mol. Microbiol.* **47**, 357–371 (2003).
- 866 26. Loftus, B. J. *et al.* The genome of the basidiomycetous yeast and human pathogen  
867 *Cryptococcus neoformans*. *Science* **307**, 1321–1324 (2005).
- 868 27. Goodwin, T. J. D. & Poulter, R. T. M. The diversity of retrotransposons in the yeast  
869 *Cryptococcus neoformans*. *Yeast* **18**, 865–880 (2001).
- 870 28. Yadav, V. *et al.* RNAi is a critical determinant of centromere evolution in closely related  
871 fungi. *Proc. Natl. Acad. Sci. U. S. A.* **115**, 3108–3113 (2018).
- 872 29. Cruz, M. C. *et al.* Rapamycin antifungal action is mediated via conserved complexes with  
873 FKBP12 and TOR kinase homologs in *Cryptococcus neoformans*. *Mol. Cell. Biol.* **19**,  
874 4101–4112 (1999).

- 875 30. Wang, X. *et al.* Sex-induced silencing defends the genome of *Cryptococcus neoformans*  
876 via RNAi. *Genes Dev.* **24**, 2566–2582 (2010).
- 877 31. Dumesic, P. A. *et al.* Stalled spliceosomes are a signal for RNAi-mediated genome  
878 defense. *Cell* **152**, 957–968 (2013).
- 879 32. Feretzaki, M., Billmyre, R. B., Clancey, S. A., Wang, X. & Heitman, J. Gene network  
880 polymorphism illuminates loss and retention of novel RNAi silencing components in the  
881 *Cryptococcus* pathogenic species complex. *PLoS Genet.* **12**, e1005868 (2016).
- 882 33. Feretzaki, M. & Heitman, J. Genetic circuits that govern bisexual and unisexual  
883 reproduction in *Cryptococcus neoformans*. *PLoS Genet.* **9**, e1003688 (2013).
- 884 34. Wang, X., Darwiche, S. & Heitman, J. Sex-induced silencing operates during opposite-sex  
885 and unisexual reproduction in *Cryptococcus neoformans*. *Genetics* **193**, 1163–1174  
886 (2013).
- 887 35. Huff, J. T. & Zilberman, D. Dnmt1-independent CG methylation contributes to  
888 nucleosome positioning in diverse eukaryotes. *Cell* **156**, 1286–1297 (2014).
- 889 36. Catania, S. *et al.* Evolutionary persistence of DNA methylation for millions of years after  
890 ancient loss of a *de novo* methyltransferase. *Cell* **180**, 263–277 (2020).
- 891 37. Dumesic, P. A. *et al.* Product binding enforces the genomic specificity of a yeast  
892 Polycomb repressive complex. *Cell* **160**, 204–218 (2015).
- 893 38. Ferrareze, P. A. G. *et al.* Application of an optimized annotation pipeline to the  
894 *Cryptococcus deuterogattii* genome reveals dynamic primary metabolic gene clusters and  
895 genomic impact of RNAi loss. *G3* **11**, jkaa070 (2021).
- 896 39. Breuder, T., Hemenway, C. S., Movva, N. R., Cardenas, M. E. & Heitman, J. Calcineurin  
897 is essential in cyclosporin A- and FK506-sensitive yeast strains. *Proc. Natl. Acad. Sci. U.*

- 898 *S. A.* **91**, 5372–5376 (1994).
- 899 40. Parent, S. A. *et al.* Calcineurin-dependent growth of an FK506- and CsA-hypersensitive  
900 mutant of *Saccharomyces cerevisiae*. *J. Gen. Microbiol.* **139**, 2973–2984 (1993).
- 901 41. Heitman, J., Movva, N. R., Hiestand, P. C. & Hall, M. N. FK 506-binding protein proline  
902 rotamase is a target for the immunosuppressive agent FK 506 in *Saccharomyces*  
903 *cerevisiae*. *Proc. Natl. Acad. Sci. U. S. A.* **88**, 1948–1952 (1991).
- 904 42. Heitman, J., Movva, N. R. & Hall, M. N. Targets for cell cycle arrest by the  
905 immunosuppressant rapamycin in yeast. *Science* **253**, 905–909 (1991).
- 906 43. Litvintseva, A. P., Thakur, R., Vilgalys, R. & Mitchell, T. G. Multilocus sequence typing  
907 reveals three genetic subpopulations of *Cryptococcus neoformans* var. *grubii* (serotype A),  
908 including a unique population in Botswana. *Genetics* **172**, 2223–2238 (2006).
- 909 44. Kwon-Chung, K. J., Varma, A., Edman, J. C. & Bennett, J. Selection of *ura5* and *ura3*  
910 mutants from the two varieties of *Cryptococcus neoformans* on 5-fluoroorotic acid  
911 medium. *J. Med. Vet. Mycol.* **30**, 61–69 (1992).
- 912 45. Edman, J. C. & Kwon-Chung, K. J. Isolation of the *URA5* gene from *Cryptococcus*  
913 *neoformans* var. *neoformans* and its use as a selective marker for transformation. *Mol.*  
914 *Cell. Biol.* **10**, 4538–4544 (1990).
- 915 46. Billmyre, R. B., Clancey, S. A., Li, L. X., Doering, T. L. & Heitman, J. 5-fluorocytosine  
916 resistance is associated with hypermutation and alterations in capsule biosynthesis in  
917 *Cryptococcus*. *Nat. Commun.* **11**, 127 (2020).
- 918 47. Janbon, G. *et al.* Analysis of the genome and transcriptome of *Cryptococcus neoformans*  
919 var. *grubii* reveals complex RNA expression and microevolution leading to virulence  
920 attenuation. *PLoS Genet.* **10**, e1004261 (2014).

- 921 48. Fan, Y. & Lin, X. Multiple applications of a Transient CRISPR-Cas9 Coupled with  
922 Electroporation (TRACE) system in the *Cryptococcus neoformans* species complex.  
923 *Genetics* **208**, 1357–1372 (2018).
- 924 49. Drinnenberg, I. A. *et al.* RNAi in budding yeast. *Science* **326**, 544–550 (2009).
- 925 50. Rahnama, M. *et al.* Transposon-mediated telomere destabilization: a driver of genome  
926 evolution in the blast fungus. *Nucleic Acids Res.* **48**, 7197–7217 (2020).
- 927 51. Mason, J. A. & Biessmann, H. The unusual telomeres of *Drosophila*. *Trends Genet.* **11**,  
928 58–62 (1995).
- 929 52. Pardue, M. Lou & DeBaryshe, P. G. Retrotransposons provide an evolutionarily robust  
930 non-telomerase mechanism to maintain telomeres. *Annu. Rev. Genet.* **37**, 485–511 (2003).
- 931 53. Ashe, A. *et al.* A deletion polymorphism in the *Caenorhabditis elegans* RIG-I homolog  
932 disables viral RNA dicing and antiviral immunity. *eLife* **2**, e00994 (2013).
- 933 54. Félix, M.-A. *et al.* Natural and experimental infection of *Caenorhabditis* nematodes by  
934 novel viruses related to nodaviruses. *PLoS Biol.* **9**, e1000586 (2011).
- 935 55. Clancey, S. A., Ruchti, F., Leibundgut-Landmann, S., Heitman, J. & Ianiri, G. A novel  
936 mycovirus evokes transcriptional rewiring in the fungus *Malassezia* and stimulates beta  
937 interferon production in macrophages. *mBio* **11**, e01534-20 (2020).
- 938 56. Kanafani, Z. A. & Perfect, J. R. Resistance to antifungal agents: mechanisms and clinical  
939 impact. *Antimicrob. Resist.* **46**, 120–128 (2008).
- 940 57. Weiberg, A. *et al.* Fungal small RNAs suppress plant immunity by hijacking host RNA  
941 interference pathways. *Science* **342**, 118–123 (2013).
- 942 58. McClintock, B. The origin and behavior of mutable loci in maize. *Proc. Natl. Acad. Sci.*  
943 *U. S. A.* **36**, 344–355 (1950).

- 944 59. Rosenberg, A. *et al.* Antifungal tolerance is a subpopulation effect distinct from resistance  
945 and is associated with persistent candidemia. *Nat. Commun.* **9**, 2470 (2018).
- 946 60. Berman, J. & Krysan, D. J. Drug resistance and tolerance in fungi. *Nat. Rev. Microbiol.*  
947 **18**, 319–331 (2020).
- 948 61. Devos, K. M., Brown, J. K. M. & Bennetzen, J. L. Genome size reduction through  
949 illegitimate recombination counteracts genome expansion in *Arabidopsis*. *Genome Res.*  
950 **12**, 1075–1079 (2002).
- 951 62. Vitte, C. & Panaud, O. LTR retrotransposons and flowering plant genome size: emergence  
952 of the increase/decrease model. *Cytogenet. Genome Res.* **110**, 91–107 (2005).
- 953 63. Drinnenberg, I. A., Fink, G. R. & Bartel, D. P. Compatibility with killer explains the rise  
954 of RNAi-deficient fungi. *Science* **333**, 1592 (2011).
- 955 64. Barton, E. S. *et al.* Herpesvirus latency confers symbiotic protection from bacterial  
956 infection. *Nature* **447**, 326–329 (2007).
- 957 65. Priest, S. J. *et al.* Factors enforcing the species boundary between the human pathogens  
958 *Cryptococcus neoformans* and *Cryptococcus deneoformans*. *PLoS Genet.* **17**, e1008871  
959 (2021).
- 960 66. Radchenko, E. A., McGinty, R. J., Aksenova, A. Y., Neil, A. J. & Mirkin, S. M.  
961 Quantitative analysis of the rates for repeat-mediated genome instability in a yeast  
962 experimental system. *Methods Mol. Biol.* **1672**, 421–438 (2018).
- 963 67. Madeira, F. *et al.* The EMBL-EBI search and sequence analysis tools APIs in 2019.  
964 *Nucleic Acids Res.* **47**, W636–W641 (2019).
- 965 68. Pitkin, J. W., Panaccione, D. G. & Walton, J. D. A putative cyclic peptide efflux pump  
966 encoded by the *TOXA* gene of the plant-pathogenic fungus *Cochliobolus carbonum*.



- 967            *Microbiology* **142**, 1557–1565 (1996).
- 968    69.    Sun, S., Priest, S. J. & Heitman, J. *Cryptococcus neoformans* mating and genetic crosses.  
969            *Curr. Protoc. Microbiol.* **53**, e75 (2019).
- 970    70.    Yadav, V., Sun, S., Coelho, M. A. & Heitman, J. Centromere scission drives chromosome  
971            shuffling and reproductive isolation. *Proc. Natl. Acad. Sci. U. S. A.* **117**, 7917–7928  
972            (2020).
- 973    71.    Bao, W., Kojima, K. K. & Kohany, O. Repbase Update, a database of repetitive elements  
974            in eukaryotic genomes. *Mob. DNA* **6**, 11 (2015).
- 975    72.    Smit, A., Hubley, R. & Green, P. RepeatMasker Open-4.0. <http://www.repeatmasker.org>  
976            (2013).
- 977    73.    Storer, J., Hubley, R., Rosen, J., Wheeler, T. J. & Smit, A. F. The Dfam community  
978            resource of transposable element families, sequence models, and genome annotations.  
979            *Mob. DNA* **12**, 2 (2021).
- 980    74.    Li, H. & Durbin, R. Fast and accurate short read alignment with Burrows-Wheeler  
981            transform. *Bioinformatics* **25**, 1754–1760 (2009).
- 982    75.    Li, H. *et al.* The Sequence Alignment/Map format and SAMtools. *Bioinformatics* **25**,  
983            2078–2079 (2009).
- 984    76.    Garrison, E. & Marth, G. Haplotype-based variant detection from short-read sequencing.  
985            *arXiv* 1207.3907 [q-bio.GN] (2012).
- 986    77.    Roth, C., Sun, S., Billmyre, R. B., Heitman, J. & Magwene, P. M. A high-resolution map  
987            of meiotic recombination in *Cryptococcus deneoformans* demonstrates decreased  
988            recombination in unisexual reproduction. *Genetics* **209**, 567–578 (2018).
- 989    78.    Xu, S. Genetic mapping and genomic selection using recombination breakpoint data.

- 990            *Genetics* **195**, 1103–1115 (2013).
- 991    79.    Churchill, G. A. & Doerge, R. W. Empirical threshold values for quantitative trait  
992            mapping. *Genetics* **138**, 963–971 (1994).
- 993    80.    Visscher, P. M., Thompson, R. & Haley, C. S. Confidence intervals in QTL mapping by  
994            bootstrapping. *Genetics* **143**, 1013–1020 (1996).
- 995    81.    Arras, S. D. M., Chitty, J. L., Blake, K. L., Schulz, B. L. & Fraser, J. A. A genomic safe  
996            haven for mutant complementation in *Cryptococcus neoformans*. *PLoS One* **10**, e0122916  
997            (2015).
- 998    82.    Fang, Y., Cui, L., Gu, B., Arredondo, F. & Tyler, B. M. Efficient genome editing in the  
999            oomycete *Phytophthora sojae* using CRISPR/Cas9. *Curr. Protoc. Microbiol.* **44**, 21A.1.1-  
1000            21A.1.26 (2017).
- 1001    83.    Andrews, S. FastQC: a quality control tool for high throughput sequence data.  
1002            <https://www.bioinformatics.babraham.ac.uk/projects/fastqc/> (2010).
- 1003    84.    Martin, M. Cutadapt removes adapter sequences from high-throughput sequencing reads.  
1004            *EMBnet.journal* **17**, 10–12 (2011).
- 1005    85.    Langmead, B., Trapnell, C., Pop, M. & Salzberg, S. L. Ultrafast and memory-efficient  
1006            alignment of short DNA sequences to the human genome. *Genome Biol.* **10**, R25 (2009).
- 1007    86.    Quinlan, A. R. & Hall, I. M. BEDTools: a flexible suite of utilities for comparing genomic  
1008            features. *Bioinformatics* **26**, 841–842 (2010).
- 1009    87.    Dahlmann, T. A. & Kück, U. Dicer-dependent biogenesis of small RNAs and evidence for  
1010            microRNA-like RNAs in the penicillin producing fungus *Penicillium chrysogenum*. *PLoS*  
1011            *One* **10**, e0125989 (2015).
- 1012    88.    Ianiri, G. *et al.* Mating-type-specific ribosomal proteins control aspects of sexual

1013 reproduction in *Cryptococcus neoformans*. *Genetics* **214**, 635–649 (2020).

1014

1015 **Supplementary Figures**

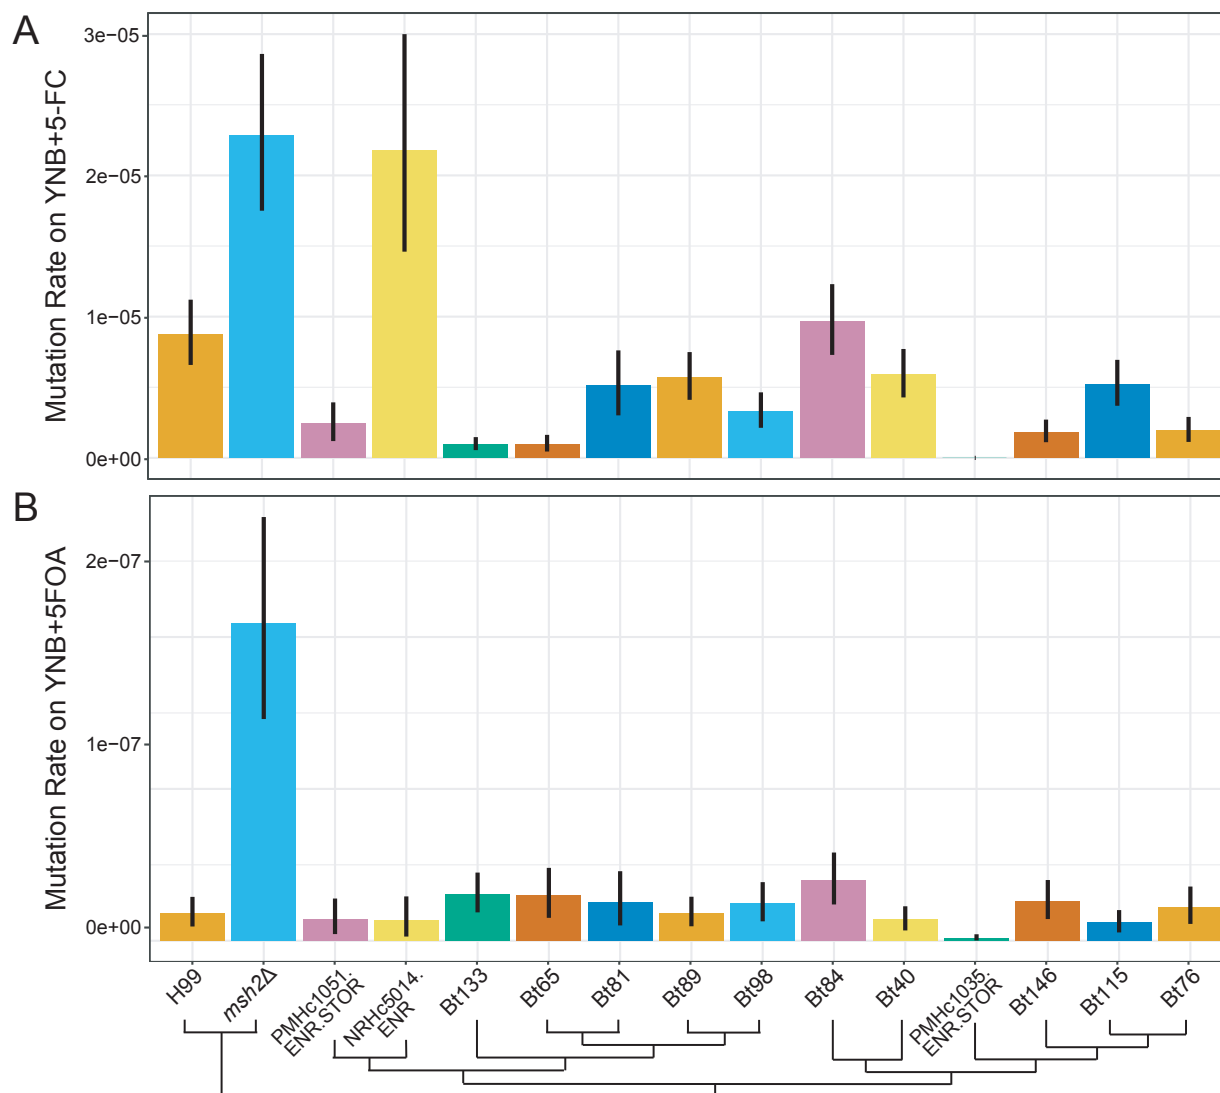

1016  
1017 **Supplementary Figure S1. Bt65 and Bt81 do not display a hypermutator phenotype on 5-**  
1018 **FC or 5-FOA.** Mutation rates of closely related VNBII strains and controls on **(A)** YNB + 5-FC  
1019 and **(B)** YNB + 5-FOA media. Bars represent the mutation rate and error bars represent 95%  
1020 confidence intervals; mutation rates represent the number of mutations per cell per generation.  
1021 Schematic depicts the phylogenetic relationships of all strains included in fluctuation analyses  
1022 based on Desjardins et al. 2017<sup>18</sup>.  
1023

1024

1025

1026

1027

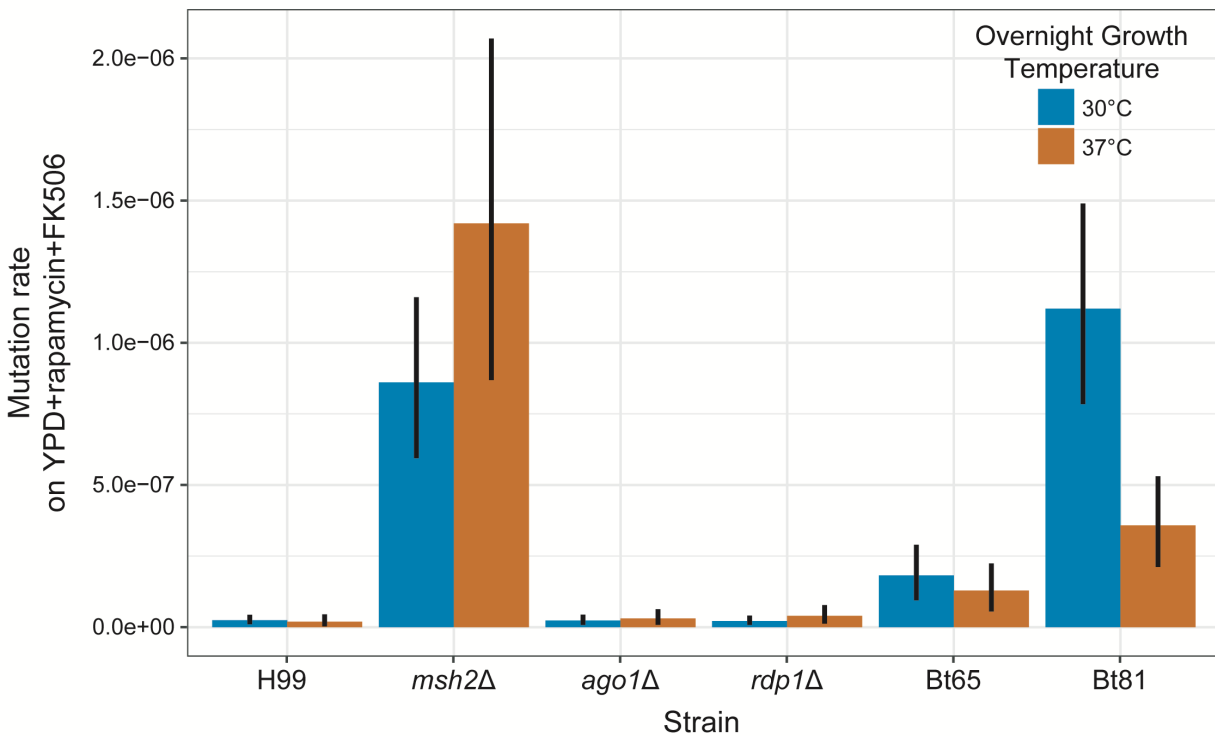

1028

1029 **Supplementary Figure S2. Growth at elevated temperature does not result in increased**

1030 **mutation rates in *C. neoformans* strains.** Fluctuation assays were used to quantify the mutation

1031 rates of strains grown overnight at 30°C or 37°C and plated on YPD + rapamycin + FK506

1032 medium. Bars indicate mean mutation rate and error bars indicate 95% confidence intervals.

1033 Mutation rates represent the number of mutations per cell per generation.

1034

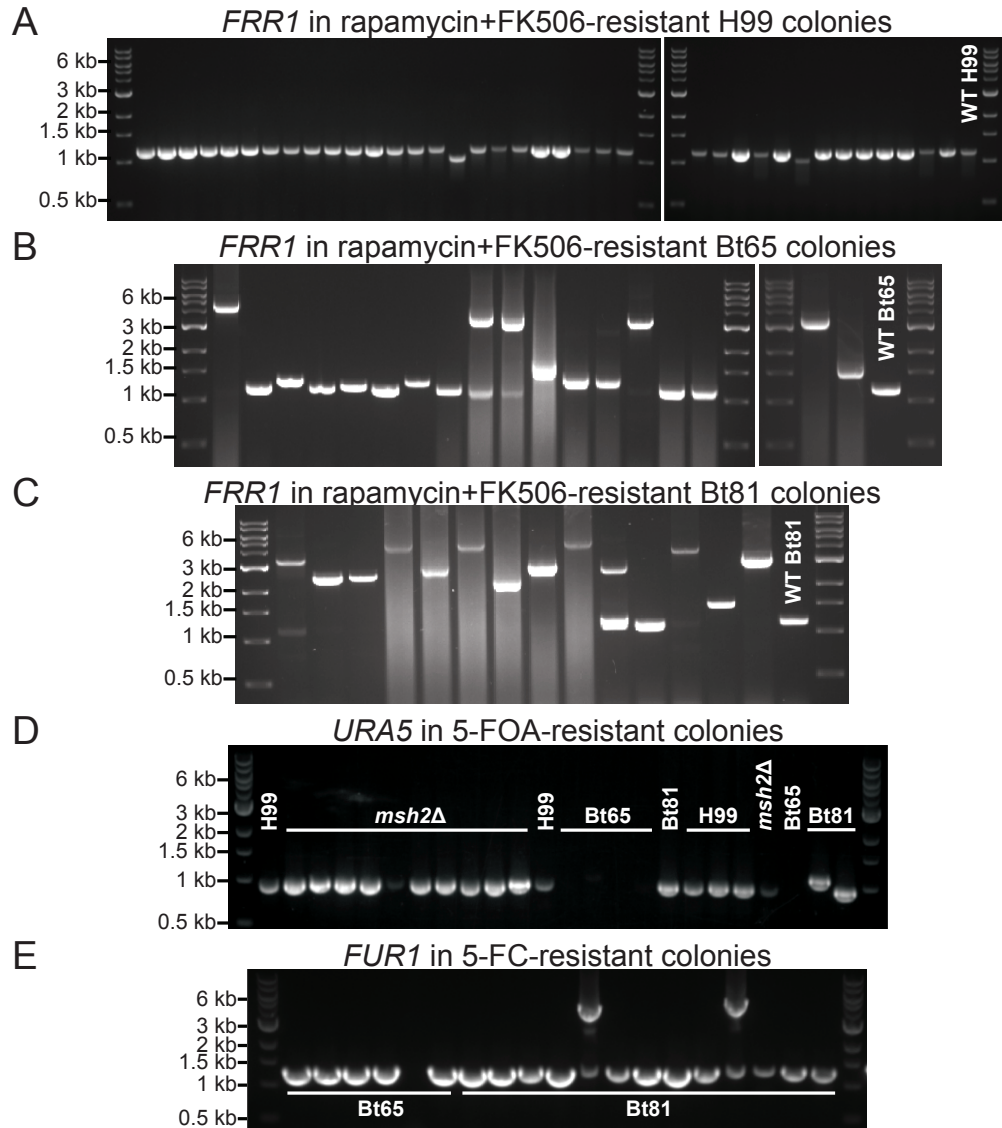

1035

1036 **Supplementary Figure S3. Gel electrophoresis *FRR1*, *URA5*, and *FUR1* PCR products**

1037 **from resistant colonies.** Gel electrophoresis of *FRR1* PCR products from (A) all H99 rapamycin

1038 + FK506-resistant colonies and a subset of (B) Bt65 and (C) Bt81 rapamycin + FK506-resistant

1039 colonies sequenced in Figure 1D. PCR amplification of wild-type *FRR1* in *C. neoformans*

1040 produces a 1,165 bp electrophoretic species (primers ZC7/8). Gel electrophoresis of a subset of

1041 (D) *URA5* PCR products from H99, Bt65, and Bt81 5-FOA-resistant colonies and (E) *FUR1*

1042 PCR products from 5-FC-resistant colonies of Bt65 and Bt81.

1043

1044

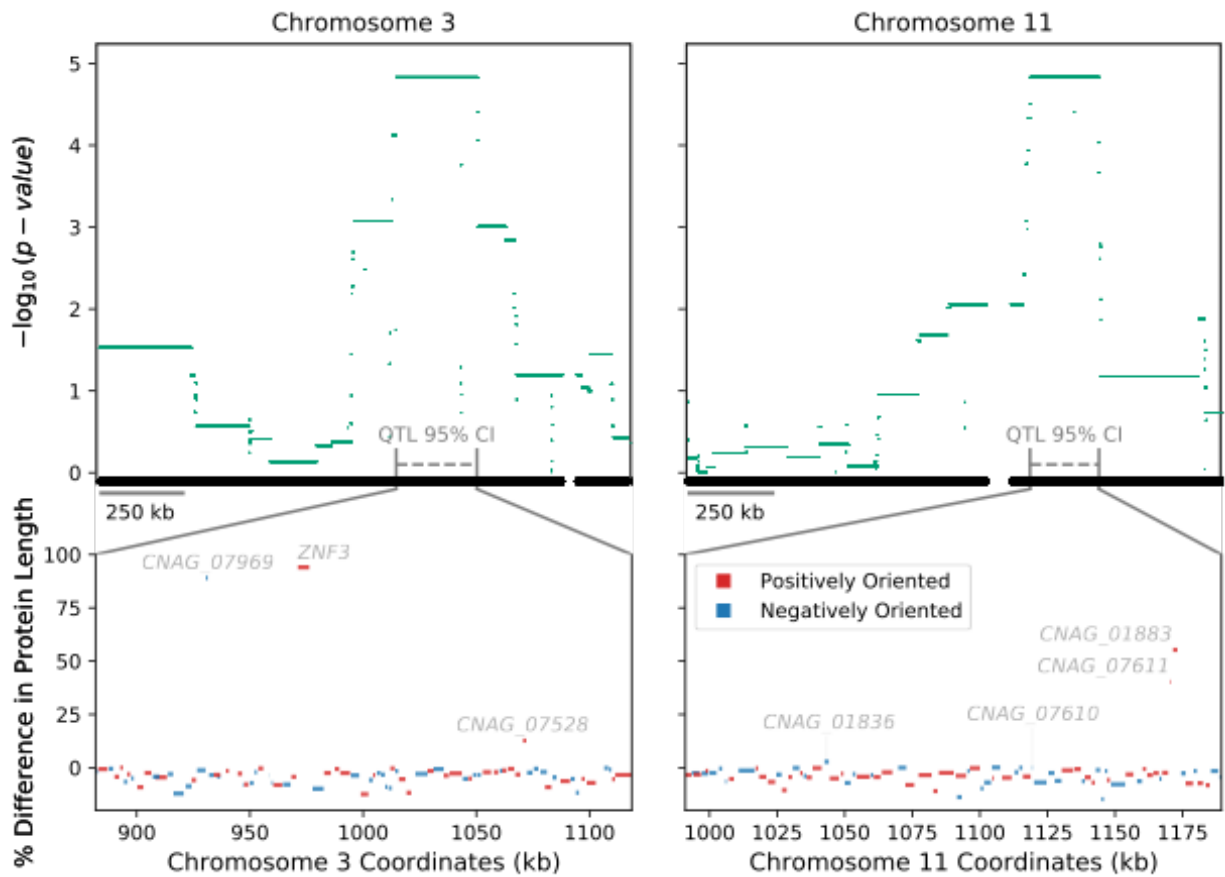

1045

1046 **Supplementary Figure S4. Protein length differences of genes within QTL.** In the upper  
1047 panels, points mark the strength of association (y-axis) between bi-allelic SNP sites and  
1048 hypermutation for Chromosome 3 and Chromosome 11 (top left and right, respectively). Grey  
1049 dashed lines depict the 95% confidence intervals (CI) of the two QTL. Lower panels show the  
1050 predicted differences in lengths of proteins (y-axis) encoded by annotated genes in Bt65  
1051 compared to H99 within each 95% CI of the QTL (x-axis) on Chromosome 3 and Chromosome  
1052 11 (bottom left and right, respectively). The name of each gene with a predicted nonsense  
1053 mutation is annotated. Blue and red colors denote the gene orientation.

1054

1055

1056

1057

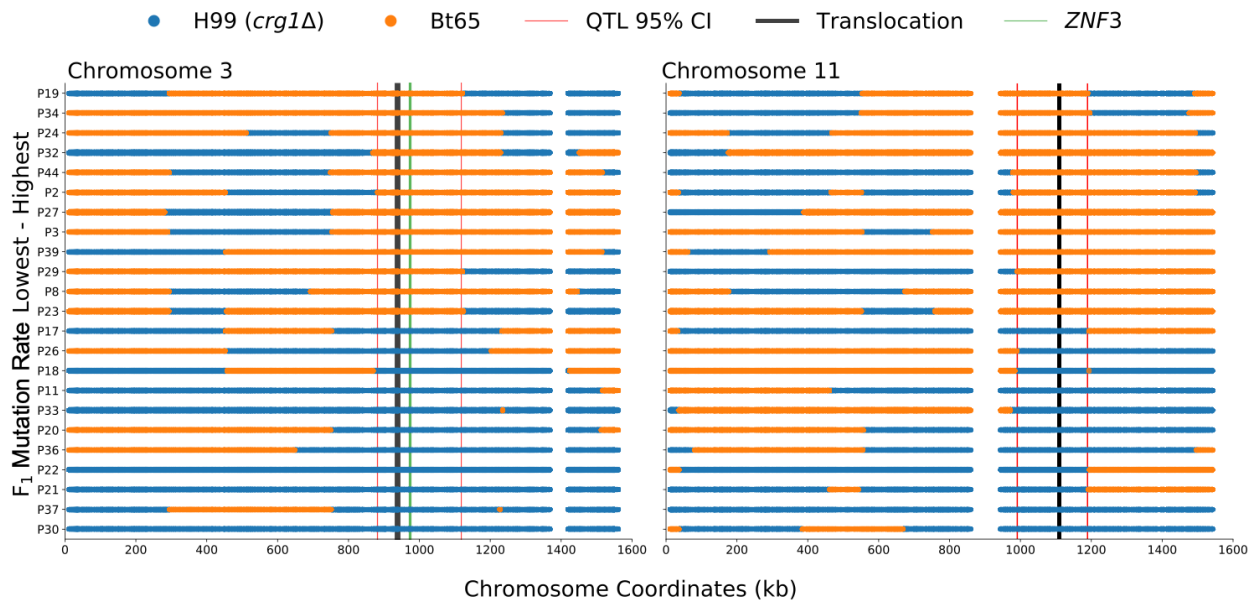

1058

1059 **Supplementary Figure S5. Haplotype maps of Bt65 x H99 F<sub>1</sub> progeny utilized for QTL**

1060 **mapping.** For the QTLs on Chromosome 3 and Chromosome 11 (left and right, respectively) the

1061 haplotypes (x-axis) are inferred by SNP data per segregant (y-axis) and colored blue or orange if

1062 inherited from H99 *crg1Δ* or Bt65, respectively. Segregants are sorted along the y-axis by the

1063 quantification of their mutation rate; largest to smallest, top to bottom. Vertical red lines display

1064 the boundaries of the QTL(s). Vertical black lines depict the approximate location of the

1065 translocation between H99 and Bt65. The boundaries of the QTG, *ZNF3*, are depicted by vertical

1066 green lines. Vertical white spaces indicate the approximate locations of the centromeres.

1067



1068

1069

1070

1071

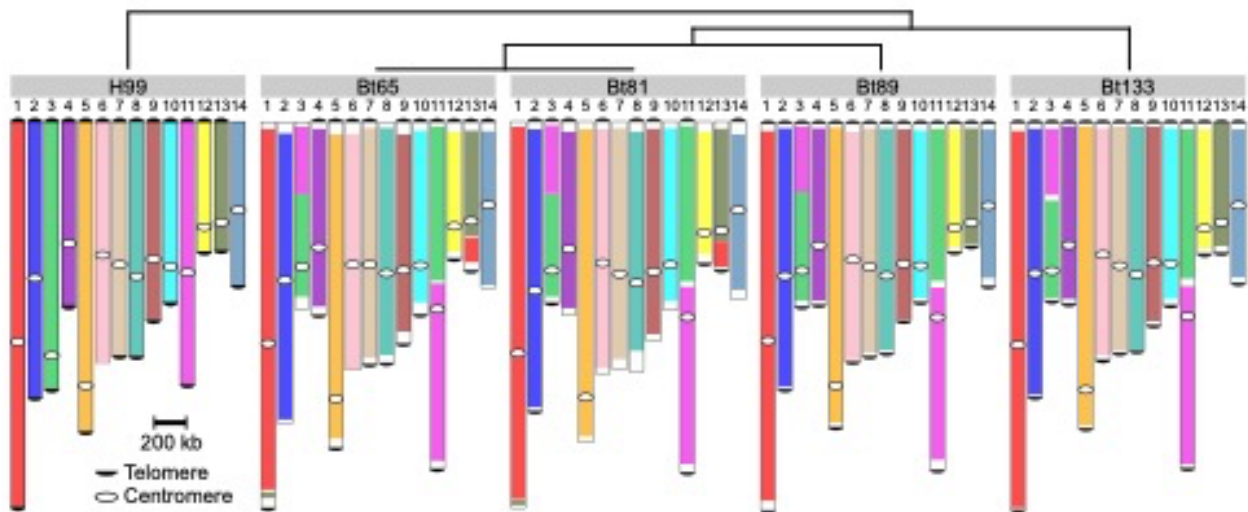

1072

1073 **Supplementary Figure S6. Large-scale genomic rearrangements between the H99, Bt65,**

1074 **Bt81, Bt89, and Bt133 genomes.** Nanopore whole-genome sequencing followed by synteny

1075 analysis was used to identify all indicated genomic rearrangements with respect to the reference

1076 strain H99. There is a chromosomal translocation between Chromosomes 3 and 11 that is unique

1077 to H99, and a translocation between H99 Chromosomes 1 and 13 that is unique to Bt65 and

1078 Bt81. The phylogenetic relationships of these strains are depicted in the top schematic, telomeric

1079 repeat sequences accurately identified in the genomic assemblies are indicated by black half

1080 circles, and centromeres are indicated by white circles.

1081

1082

1083

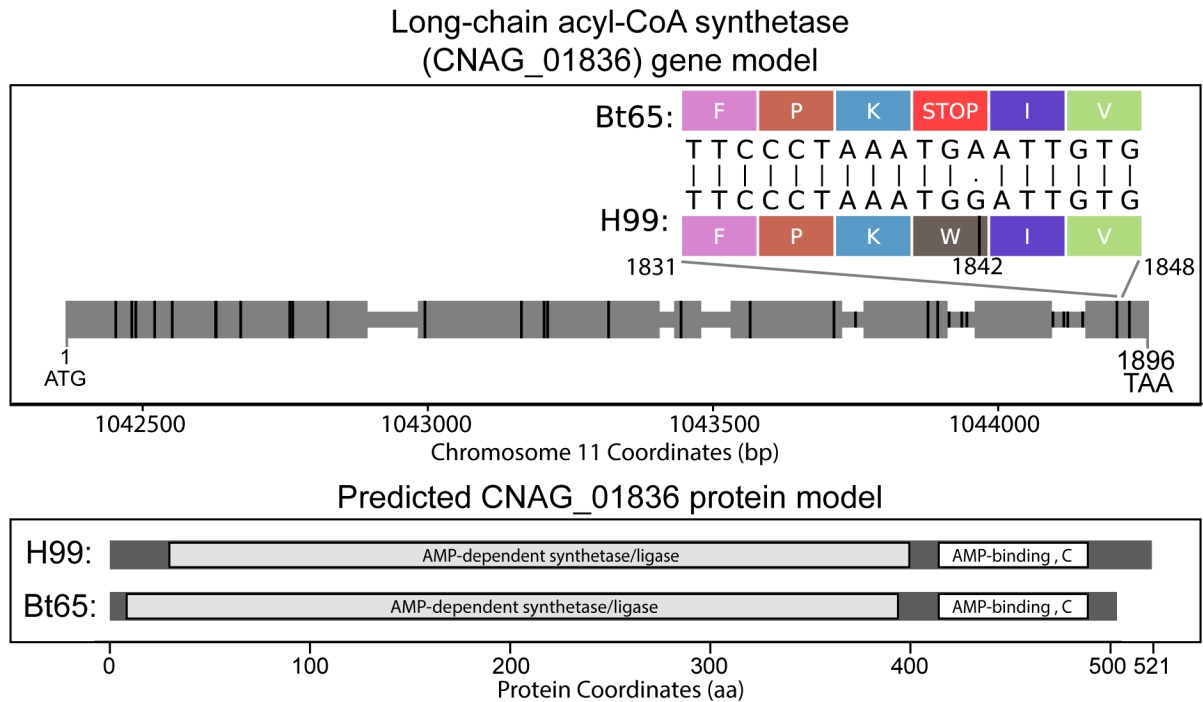

1084

1085 **Supplementary Figure S7. CNAG\_01836 gene model.** A grey horizontal bar depicts the entire

1086 gene body in the upper panel, and larger grey rectangles show locations of exons. The gene is

1087 depicted 5' to 3', left to right, and is 1896 nt in length. The locations of SNPs differing between

1088 Bt65 and H99 are shown by vertical black rungs along the gene model. Amino acids specified by

1089 mRNA codons in the indicated region of CNAG\_01836 Exon 7 (nucleotide 1831 to 1848) are

1090 shown to illustrate the G to A mutation (nucleotide 1842) predicted to cause an early nonsense

1091 mutation in Bt65. The bottom panel depicts the predicted outcome of the nonsense mutation on

1092 the protein encoded by CNAG\_01836 in Bt65.

1093

1094  
1095  
1096  
1097

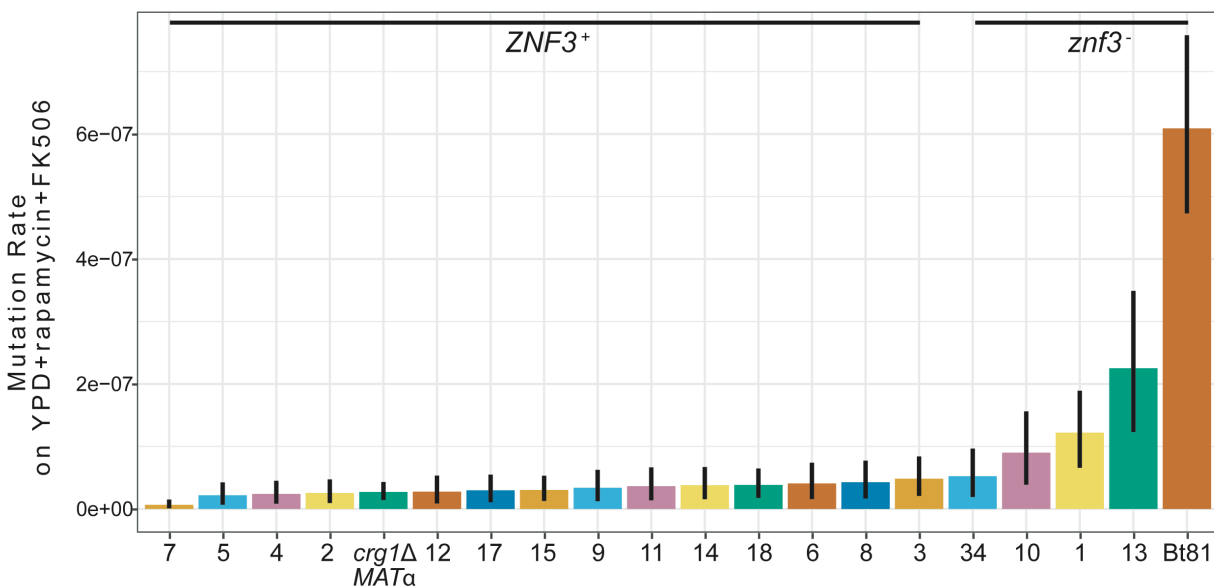

1098  
1099  
1100  
1101  
1102  
1103  
1104  
1105  
1106

**Supplementary Figure S8. Mutation rates of Bt81 x H99 F<sub>1</sub> progeny.** Fluctuation analysis

was used to quantify the mutation rates of the indicated strains on YPD + rapamycin + FK506

medium (y-axis) – sorted smallest to largest, left to right – for F<sub>1</sub> progeny and the parental

strains, H99α *crg1Δ* and Bt81 (x-axis). Bars indicate the mean mutation rate and error bars

represent 95% confidence intervals. Mutation rates represent the number of mutations per cell

per generation. Inheritance of the Bt81 *znf3* allele or H99 *crg1Δ* *ZNF3* allele in the F<sub>1</sub> progeny is

indicated above mutation rates.

1107

1108

1109

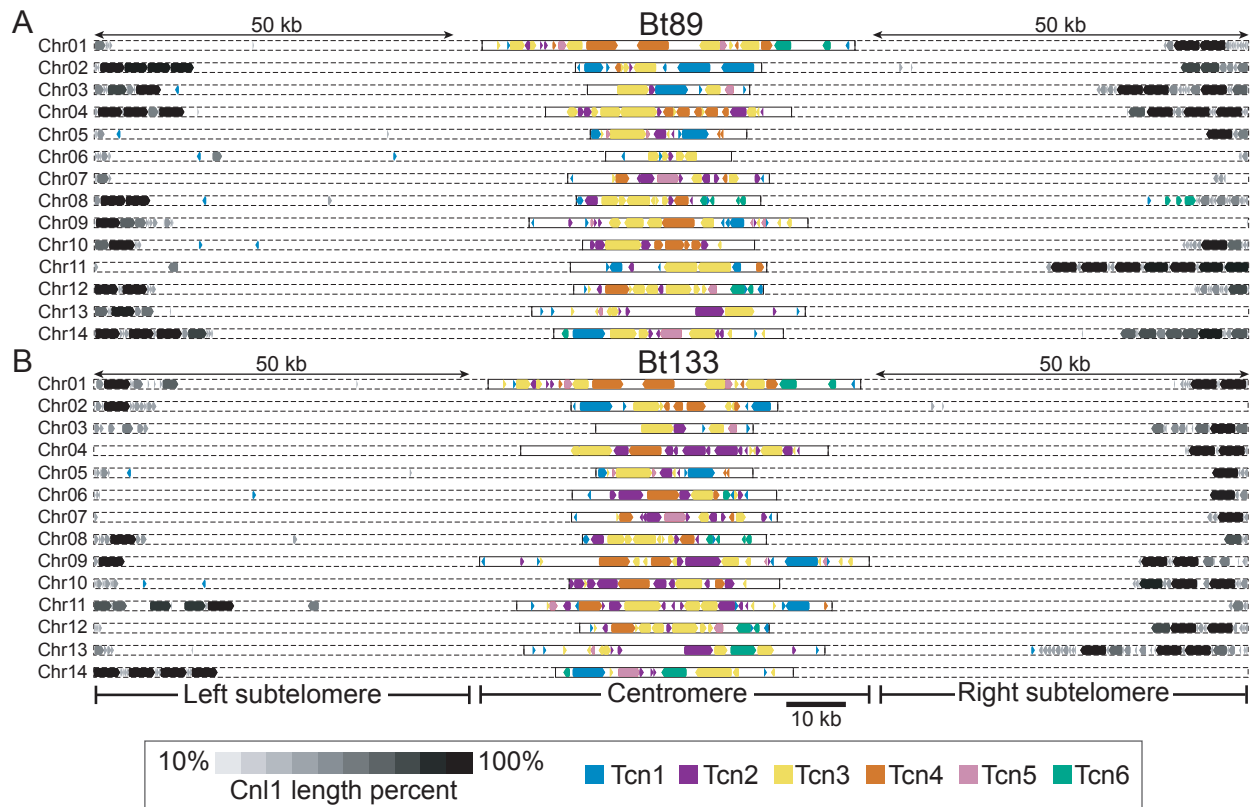

1110

1111 **Supplementary Figure S9. Subtelomeric and centromeric retrotransposons in Bt89 and**

1112 **Bt133.** Distributions of the Tcn1-Tcn6 LTR-retrotransposons and the Cn11 non-LTR

1113 retrotransposon in the genomes of (A) Bt89 and (B) Bt133. 50 kb of subtelomeric regions as well

1114 as centromeric regions are displayed for both strains. Shading corresponds to the lengths of the

1115 Cn11 elements, and gene arrowheads indicate the direction of transcription for all

1116 retrotransposons.

1117

1118

1119

1120

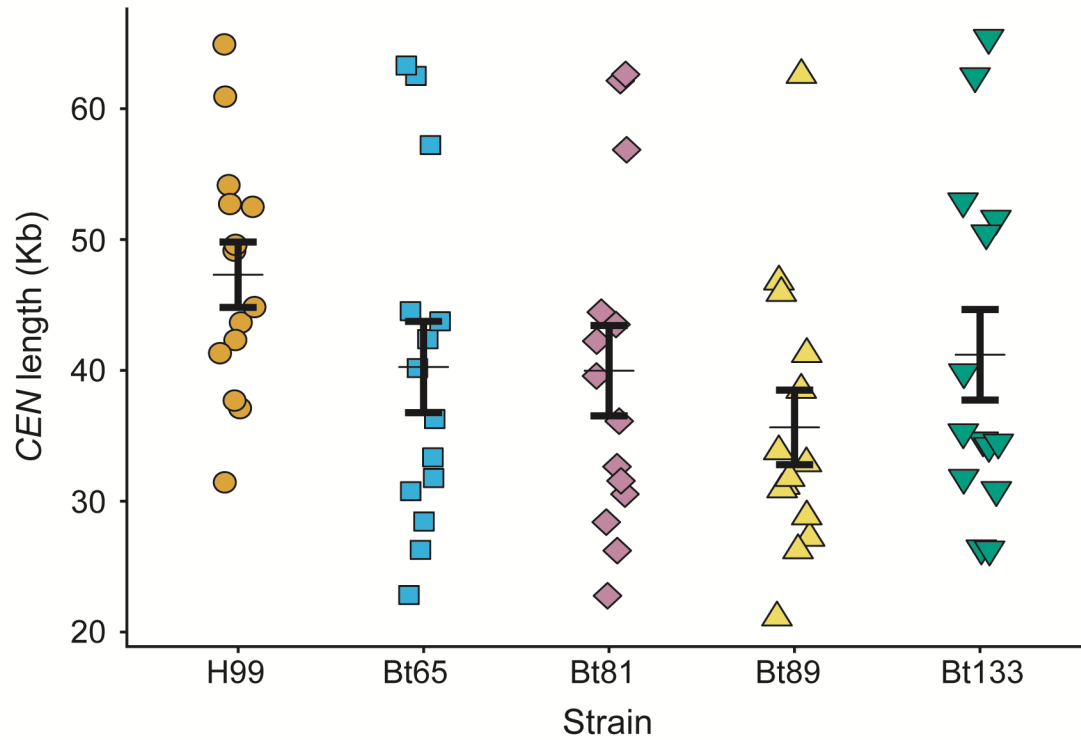

1121

1122 **Supplementary Figure S10. Centromere lengths do not significantly differ among H99,**

1123 **Bt65, Bt81, Bt89, and Bt133.** The length of each centromere (y-axis) is plotted for each strain

1124 (x-axis). The thin horizontal black line indicates average centromere length and the thicker black

1125 error bars indicate the standard error of the mean. No significant difference was found between

1126 the average centromere length of each strain (ANOVA,  $p$ -value = 0.153).

1127

1128

1129

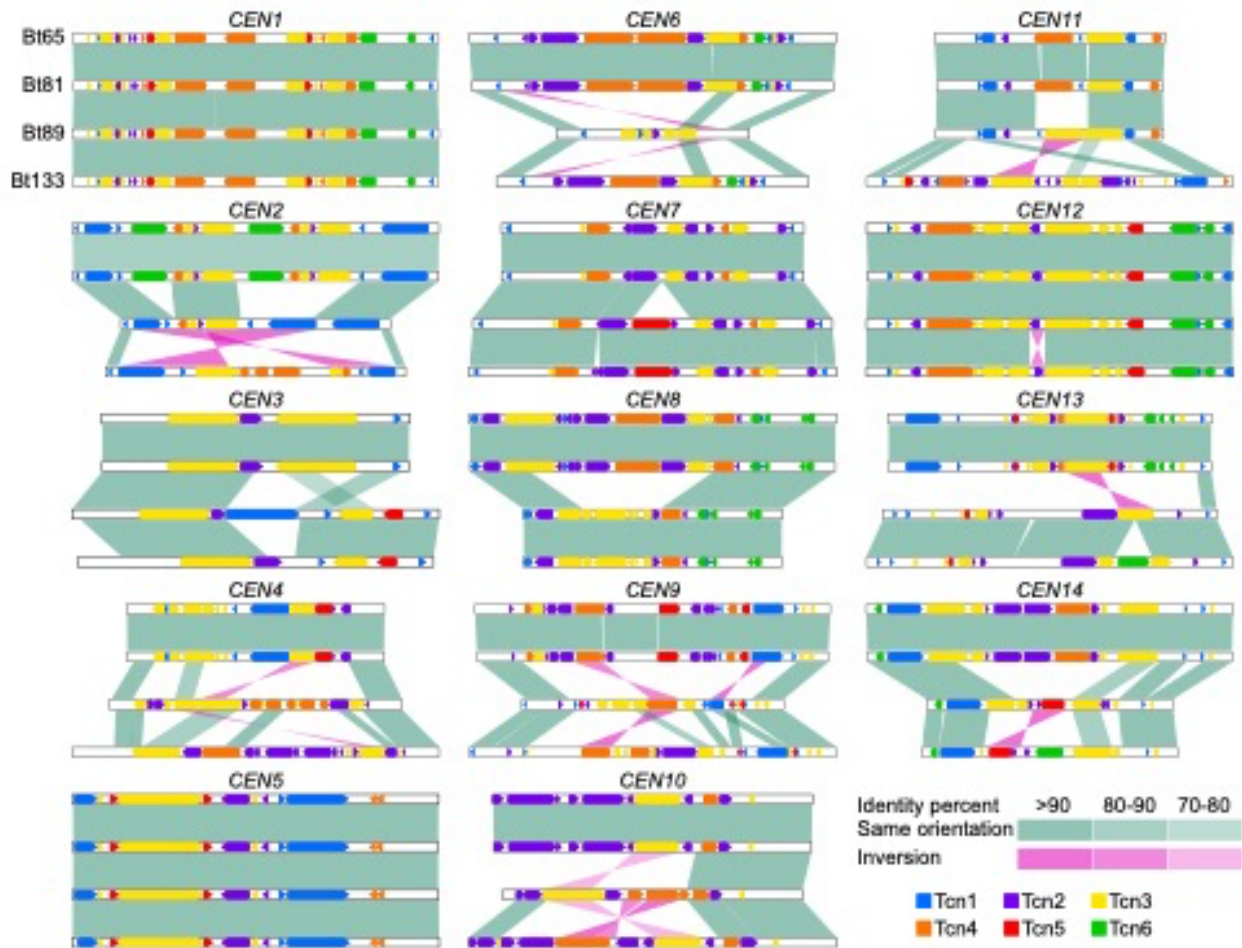

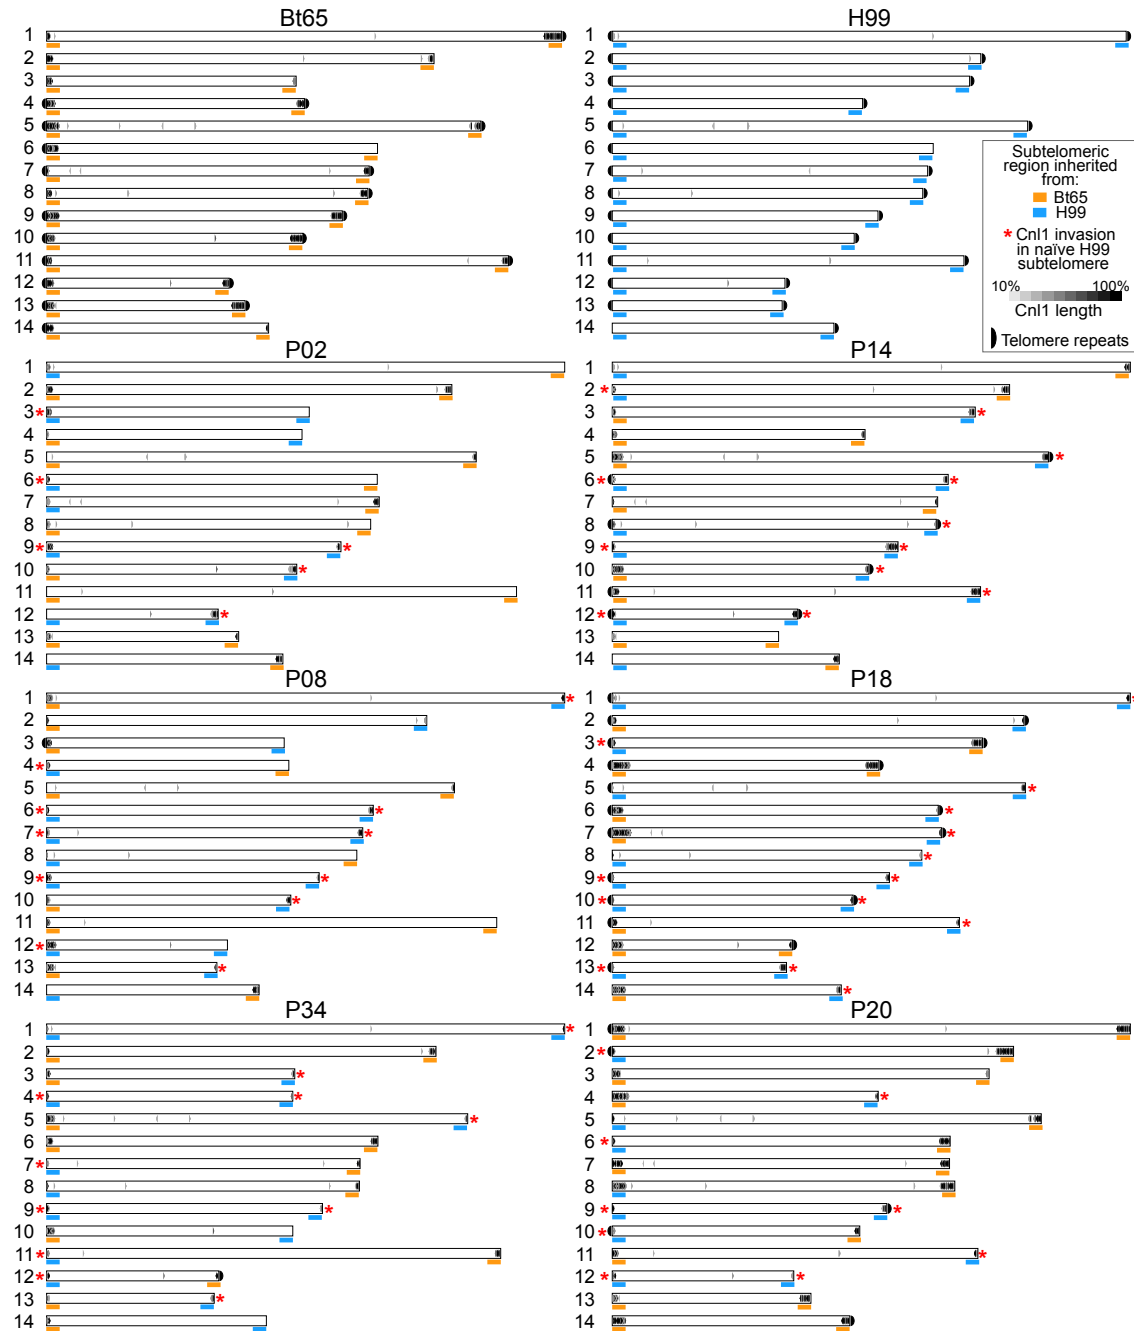

1138 **Supplementary Figure S12. Distribution of Cn11 among Bt65 x H99 F<sub>1</sub> progeny and**  
1139 **parental strains.** The Cn11 non-LTR elements identified in the nanopore-based whole-genome  
1140 assemblies are depicted for H99, Bt65, three hypermutator F<sub>1</sub> progeny (P02, P08, and P34, all on  
1141 the left), and three non-hypermutator F<sub>1</sub> progeny (P14, P18, and P20, all on the right). Blue and  
1142 orange bars under the subtelomeric region of each chromosome indicate which parental strain the  
1143 region was inherited from (orange for Bt65, blue for H99). Red asterisks indicate invasion of  
1144 Cn11 into an H99 subtelomeric region that previously had zero Cn11 copies/fragments. Accurate  
1145 assembly of telomeric repeat sequences at the end of each chromosome is indicated by a black  
1146 half circle. Cn11 length is also indicated by the shade of black for each element.

1147

1148

1149

1150

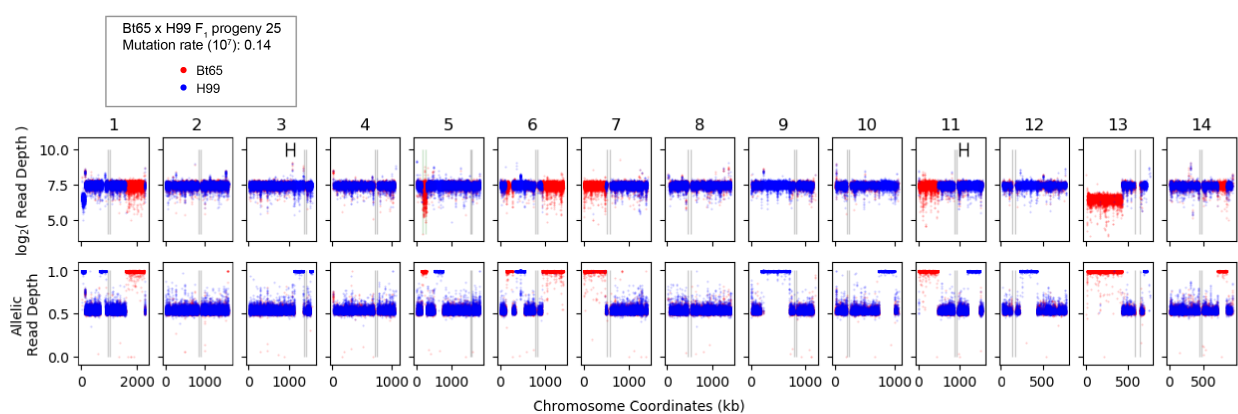

1151

1152 **Supplementary Figure S13. Genomic diagnostic plot of Bt65 x H99 F<sub>1</sub> progeny 25.** For the  
1153 14 chromosomes (columns), the log<sub>2</sub> (read depth) (top row) and allelic read depth ratio (bottom  
1154 row) per genetic variant are shown for the progeny 25. Red and blue colors indicate the  
1155 prediction of the allele inherited (Bt65 vs. H99, respectively) at each genetic variant. Allelic read  
1156 depth ratios nearing 0.5 suggest both alleles are present for a given genetic variant. Marked  
1157 ranges on Chromosomes 3 and 11 log<sub>2</sub> (read depth) plots indicate the significant hypermutator  
1158 QTL. Black vertical lines depict the boundaries of the centromeres. The boundaries of the *MAT*  
1159 locus on Chromosome 5 are shown by vertical green lines.

1160



1161

1162

1163

1164

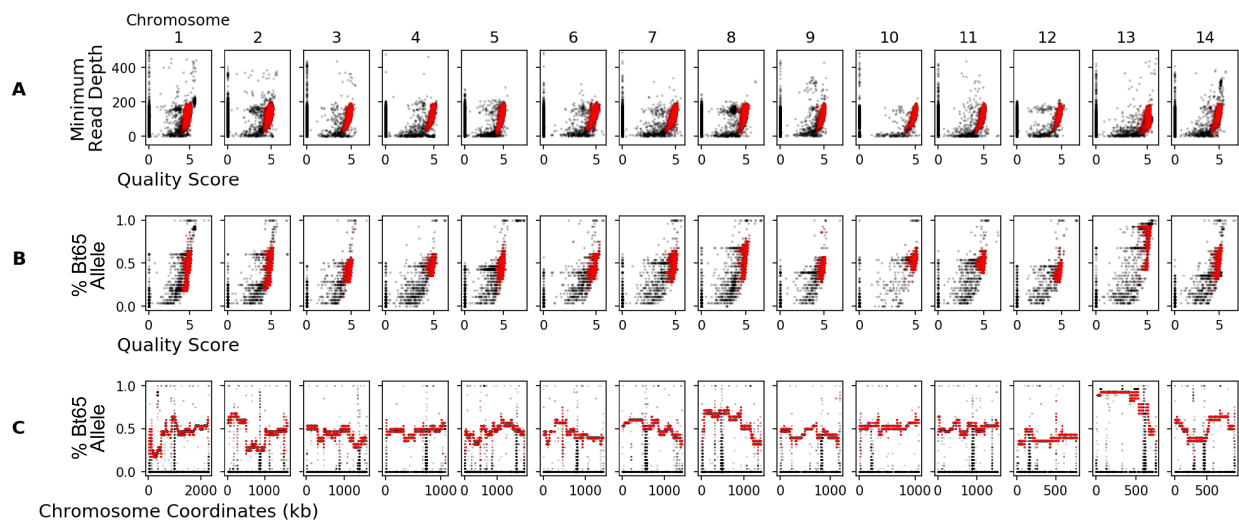

1165

1166 **Supplementary Figure S14. Visualization of genetic variant filtering criteria. (A)** For the 14

1167 chromosomes (columns), the quality scores of the genetic variants (x-axis) vs. the minimum read

1168 depth across the 28 Bt65 x H99 F<sub>1</sub> segregants (y-axis). **(B)** the quality scores of genetic variants

1169 (x-axis) vs. the portion of progeny with the Bt65 allele per genetic variant (y-axis) per

1170 chromosome (columns). **(C)** The portion of progeny with the Bt65 allele per genetic variant (y-

1171 axis) across each chromosome (x-axis). The raw genetic variants are shown in black and the

1172 filtered SNPs, used in analysis, are shown in red.

1173

1174

1175

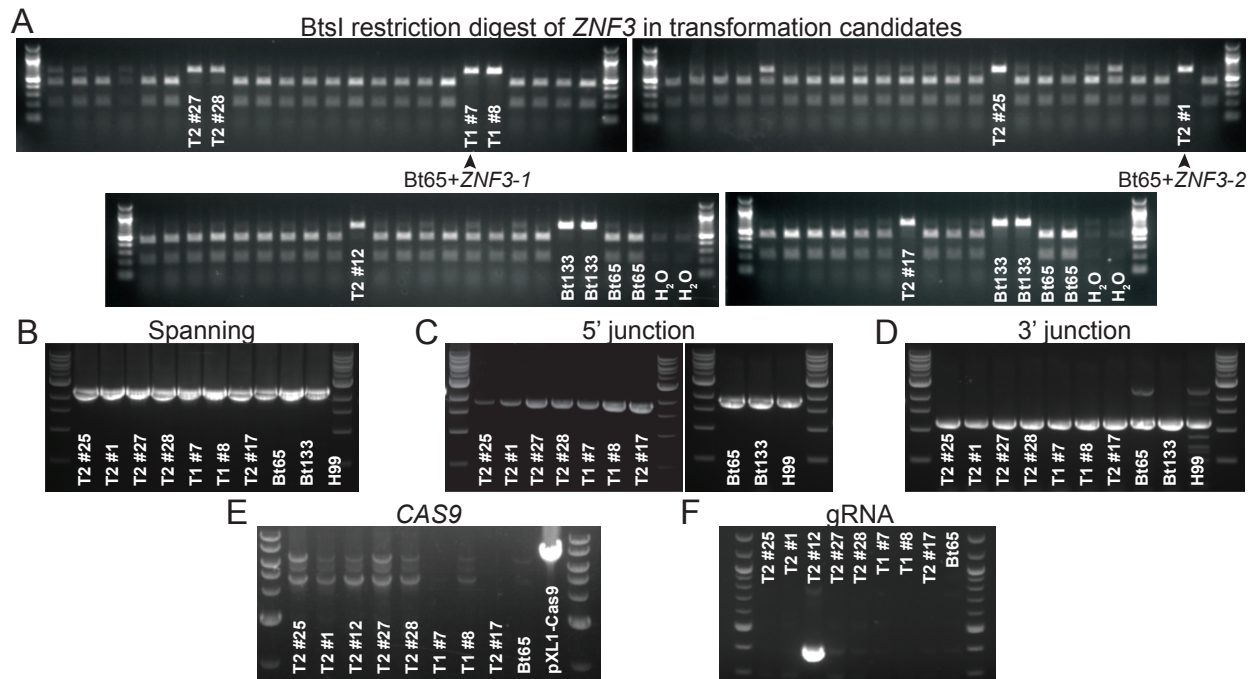

1176

1177 **Supplementary Figure S15. Identification and confirmation of correct Bt65+*ZNF3***

1178 **transformants. (A)** BtsI restriction enzyme digestion of *ZNF3* PCR products from

1179 nourseothricin-resistant transformants and controls (primers SJP186/187). **(B)** PCR amplification

1180 of the *ZNF3* allele using primers outside of the Bt133 *ZNF3* allele used for homologous

1181 recombination (primers SJP208/209). PCR amplification to ensure correct integration of the **(C)**

1182 5' and **(D)** 3' ends of the Bt133 *ZNF3* allele at the endogenous *ZNF3* locus (primers SJP208/187,

1183 and SJP186/209, respectively). PCR to ensure neither **(E)** CAS9 nor **(F)** the gRNA constructs

1184 were integrated into the transformants (primers JOHE41657/45812 and JOHE50451/50452,

1185 respectively).

1186

1187

1188

1189

1190

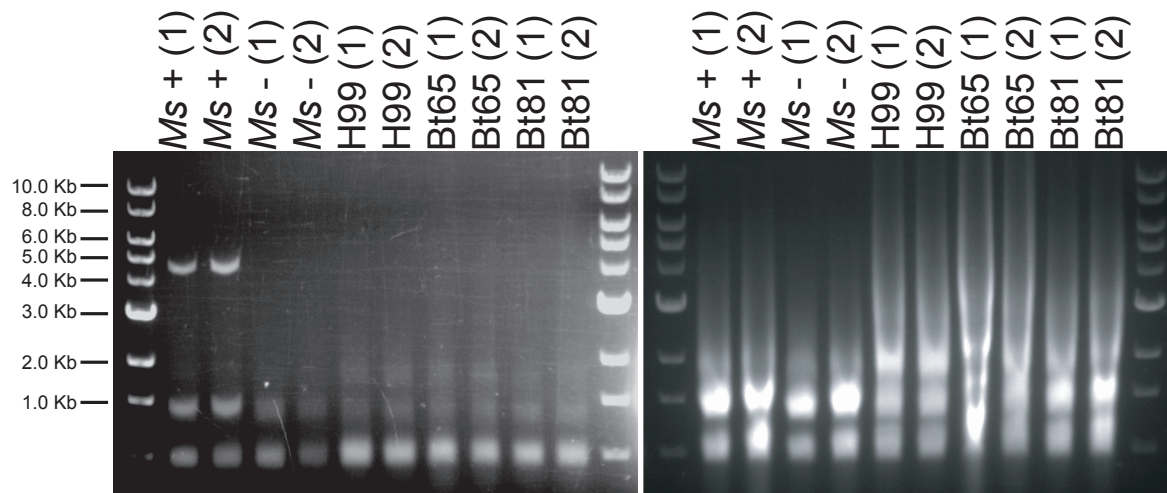

1191

1192 **Supplementary Figure S16. Enrichment for dsRNA does not identify any fragments likely**

1193 **to be dsRNA mycoviruses.** Pictured on the left are RNA samples following LiCl enrichment for

1194 dsRNA run on a 1% agarose gel. Total RNA prior to dsRNA enrichment is pictured on the right

1195 on a 1% agarose gel. *Ms+* is a *Malassezia sympodialis* strain that harbors a dsRNA virus, and

1196 *Ms-* is a congenic virus-cleared strain<sup>55</sup>. Two biological replicates for all samples are shown and

1197 labeled (1) and (2). The TriDye 1 kb DNA ladder (NEB) was used to estimate RNA fragment

1198 sizes.

1199

1200 **Supplementary Table Legends**

1201 **Supplementary Table S1. Strains included in preliminary screen of SDC isolates for**  
1202 **hypermethylation phenotype.**

1203

1204 **Supplementary Table S2. Genetic variants and predicted changes in genes within QTL**  
1205 **between H99 and Bt65.**

1206

1207 **Supplementary Table S3. (A) Centromere lengths in H99, Bt65, Bt81, Bt89, and Bt133, and**  
1208 **(B) one-way ANOVA and Tukey's HSD post hoc statistical tests for differences in mean**  
1209 **centromere length.**

1210

1211 **Supplementary Table S4. sRNA analysis**

1212

1213 **Supplementary Table S5. Strains used in this study.**

1214

1215 **Supplementary Table S6. Mutation rates and 95% confidence intervals for all fluctuation**  
1216 **assays.**

1217

1218 **Supplementary Table S7. Oligonucleotides used in this study.**

1219

1220 **Supplementary Table S8. Cnl1 insertion sequences in PCR products.**

1221

1222 **Supplementary Table S9. Aneuploid, diploid, and clonal Bt65 x H99 F<sub>1</sub> progeny.**
