# Supplementary material for: Rampant transposition following RNAi loss causes hypermutation and antifungal drug resistance in clinical isolates of a human fungal pathogen
Source: bioRxiv preprint, doi:10.1101/2021.08.11.455996, version 2 (2022-05-03)
Supplement: Supplementary Table S4 [file 455996_file05.xlsx]

## Sheet: Diff. Expressed Transposons
Small RNA libraries mapped to the Bt65 genome sequence							Reference genome: Bt65_Chr_FINAL_Feb2021.fasta
	H99 (S12)	Bt81 (S25)	Bt65 (S24)	Bt65::ZNF3-T1 (S16)	Bt65::ZNF3-T2 (S17)	H99 (S12)	Bt81 (S25)	Bt65::ZNF3-T1 (S16)	Bt65::ZNF3-T2 (S17)	Normalized by rpm
ID	Total	Total	Total	Total	Total	log2(H99/Bt65)	log2(Bt81/Bt65)	log2(Bt65::ZNF3-T1/Bt65)	log2(Bt65::ZNF3-T2/Bt65)	strain	total mapped reads
TCN6-I_629	0	0	0.182363	0	0	0	0	0	0	H99	10819477
TCN6-I_628	0	0	0	0	0	0	0	0	0	Bt81	11332724
Harbinger-2_SLL_468	0.184852	0.08824	0.0911814	0	0	1.01956	-0.0473059	0	0	Bt65	10967151
Gypsy-62_BG-LTR_158	0	0	0	0	0	0	0	0	0	Bt65::ZNF3-T1	7628977
PIF_Harbinger-1_CryNeo_278	0.277278	0.08824	0	0	0.121672	0	0	0	0	Bt65:ZNF3-T2	8218848
PIF_Harbinger-1_CryNeo_277	0	0.08824	0	0	0	0	0	0	0
PIF_Harbinger-1_CryNeo_276	0	0	0	0.262158	0	0	0	0	0
Copia-1_SCH-I_53	0	0	0.182363	0.393238	0	0	0	1.10859	0
LTR12_CN_485	0	0	0	0	0	0	0	0	0
LTR12_CN_484	0	0	0	0	0	0	0	0	0
TCN3-LTR_383	0.369704	0.08824	0	0	0	0	0	0	0
TCN3-LTR_382	0	0.70592	0.182363	0.262158	0	0	1.95269	0.523627	0
TCN3-LTR_381	0.184852	0.08824	0.182363	0.131079	0.365015	0.019558	-1.04731	-0.476373	1.00114
TCN3-LTR_380	0.184852	0.17648	0.0911814	0.262158	0	1.01956	0.952694	1.52363	0
TCN2-I_75	0.0924259	0.08824	0	0	0	0	0	0	0
TCN6-I_1282	0.646981	2.55896	2.09717	2.62158	0.608358	-1.69665	0.287113	0.321993	-1.78545
TCN6-I_1281	0	0.17648	0.273544	0.131079	0.121672	0	-0.632268	-1.06134	-1.16878
TCN6-I_1280	0.0924259	0.35296	0.547088	0.131079	0.121672	-2.5654	-0.632268	-2.06134	-2.16878
TCN3-LTR_379	0.184852	0.26472	0.182363	0	0	0.019558	0.537657	0	0
TCN3-LTR_378	0.0924259	0.17648	0.547088	0	0.243343	-2.5654	-1.63227	0	-1.16878
TCN5-I_525	0	0.70592	0.455907	0.655396	0	0	0.630766	0.523627	0
TCN3-LTR_377	0	0.08824	0.0911814	0	0	0	-0.0473059	0	0
TCN3-LTR_376	0.0924259	0	0	0	0	0	0	0	0
Cnl1_575	0.369704	1.14712	1.18536	0.262158	0.121672	-1.68088	-0.0473059	-2.17681	-3.28426
Cnl1_574	0.46213	2.55896	2.73544	1.04863	0.730029	-2.5654	-0.0962155	-1.38326	-1.90575
Copia-14_BG-I_1046	0	0.26472	0.364726	0	0.121672	0	-0.462343	0	-1.58382
Copia-58_BG-I_858	0	0.35296	0.182363	0.393238	0	0	0.952694	1.10859	0
Cnl1_573	0.0924259	3.88256	3.00899	0.917554	2.5551	-5.02484	0.367732	-1.71341	-0.235896
Cnl1_572	18.5776	1270.66	0	30453.4	121937	0	0	0	0
Cnl1_571	0	0.26472	0.0911814	0	0	0	1.53766	0	0
Cnl1_570	0.0924259	0	0	0	0	0	0	0	0
TCN1-LTR_683	0.0924259	0.61768	0.63827	0.131079	0.365015	-2.7878	-0.0473059	-2.28373	-0.806212
TCN1-LTR_682	1.29396	2.6472	0.547088	2.35943	0.365015	1.24195	2.27462	2.10859	-0.583819
TCN1-LTR_681	0.184852	0.4412	0.364726	0.131079	0	-0.980442	0.274622	-1.47637	0
TCN4-I_524	0	0.08824	0.273544	0.131079	0	0	-1.63227	-1.06134	0
TCN4-I_523	0.277278	0.35296	0.547088	0.393238	0	-0.980442	-0.632268	-0.476373	0
TCN3-LTR_90	88.7289	0.17648	0	0.393238	0.243343	0	0	0	0
Cnl1_569	0.184852	0	0	0	0.121672	0	0	0	0
TCN4-I_522	0.184852	0.26472	0.182363	2.4905	0	0.019558	0.537657	3.77155	0
Cnl1_568	0.0924259	0.4412	0	0.131079	0	0	0	0	0
TCN4-I_521	0	0.17648	0	0	0	0	0	0	0
Cnl1_567	0.0924259	0.4412	0.729451	0.262158	0.730029	-2.98044	-0.725378	-1.47637	0.0011432
Cnl1_566	0	0.08824	0.0911814	0	0	0	-0.0473059	0	0
Cnl1_565	0.184852	0	0	0	0.121672	0	0	0	0
Cnl1_564	0	0.26472	0.364726	0	0	0	-0.462343	0	0
Cnl1_563	0	0	0.0911814	0	0.243343	0	0	0	1.41618
Cnl1_562	0.0924259	0.08824	0	0	0	0	0	0	0
Copia-1_SCH-I_153	0	0.08824	0	0	0	0	0	0	0
Cnl1_561	4.991	647.594	0	15223.8	114670	0	0	0	0
Cnl1_560	0.0924259	0.08824	0.182363	0	0	-0.980442	-1.04731	0	0
TCN10-LTR_280	0.0924259	0.26472	0	0.131079	0	0	0	0	0
Copia-58_BG-I_57	0.369704	0.8824	0.455907	0	0.243343	-0.30237	0.952694	0	-0.905747
Copia-58_BG-I_56	0.739407	2.11776	0	0	1.21672	0	0	0	0
TCN3-LTR_89	2994.78	1.05888	0	1.04863	1.46006	0	0	0	0
Copia-58_BG-I_55	0.0924259	0.17648	0.0911814	0	0.121672	0.019558	0.952694	0	0.416181
TCN3-LTR_88	2293.36	0.35296	0	0.524317	1.33839	0	0	0	0
Copia-58_BG-I_54	0	0.4412	0.0911814	0.131079	0.243343	0	2.27462	0.523627	1.41618
TCN3-LTR_87	4338.01	1.14712	0	0.786475	1.46006	0	0	0	0
TCN3-LTR_86	1396.19	0.17648	0	0	0.243343	0	0	0	0
Cnl1_559	0	0	0.0911814	0	0	0	0	0	0
Cnl1_558	0.0924259	0	0.0911814	0	0	0.019558	0	0	0
Cnl1_557	0	0	0	0	0	0	0	0	0
Cnl1_556	0	0.08824	0	0.131079	0	0	0	0	0
Cnl1_555	0	0.26472	0.364726	0	0.121672	0	-0.462343	0	-1.58382
Cnl1_554	4.6213	43.3259	0	4662.88	14929.8	0	0	0	0
Cnl1_553	0	66.6212	0	187.443	8986.78	0	0	0	0
Cnl1_552	1.01669	2.02952	1.09418	0.786475	1.7034	-0.105973	0.891294	-0.476373	0.638573
TCN5-LTR_1279	0	0.08824	0	0	0.243343	0	0	0	0
Cnl1_551	1.47881	3.5296	3.19135	2.62158	0.730029	-1.10972	0.145339	-0.283728	-2.12814
Cnl1_550	0	0.97064	0.63827	0.262158	0.608358	0	0.604771	-1.28373	-0.0692461
TCN10-LTR_279	6.28496	5.02968	5.19734	34.3427	0	0.274131	-0.0473059	2.72416	0
TCN4-I_1274	0	1.3236	0.273544	0.917554	0.121672	0	2.27462	1.74602	-1.16878
TCN4-I_1273	0	0.08824	0	0	0.121672	0	0	0	0
TCN4-I_1272	0.554555	0.61768	0.182363	0	0.243343	1.60452	1.76005	0	0.416181
TCN4-I_1271	0	0.08824	0.0911814	0	0	0	-0.0473059	0	0
Gypsy-62_BG-LTR_466	0.184852	0	0	0	0	0	0	0	0
Cnl1_549	0.0924259	0.4412	0.63827	0.131079	0	-2.7878	-0.532733	-2.28373	0
Cnl1_548	0.369704	3.35312	0.820632	0.393238	22.7526	-1.15037	2.0307	-1.06134	4.79315
Cnl1_547	0.277278	1.14712	1.09418	9.69986	0.608358	-1.98044	0.0681713	3.14812	-0.846854
Cnl1_546	10.8138	51.1792	1.64126	1.44187	15.8173	2.72	4.96268	-0.186866	3.26862
Cnl1_545	16.7291	872.606	0.0911814	26234.6	79087	7.5194	13.2243	18.1343	19.7263
Cnl1_1299	17.0064	1151	0	20351.9	110353	0	0	0	0
Cnl1_544	17.0988	969.67	0	20870	69170.5	0	0	0	0
Cnl1_1298	0.46213	0.26472	0.364726	0.262158	0.121672	0.341486	-0.462343	-0.476373	-1.58382
Cnl1_543	15.3427	864.576	0.0911814	22336.4	69971.5	7.3946	13.211	17.9022	19.5496
Cnl1_1297	3.88189	782.954	0	7337.81	67961.3	0	0	0	0
Cnl1_542	0	85.9458	0	202.255	7124.48	0	0	0	0
Cnl1_1296	0.46213	2.02952	3.00899	0.786475	1.09504	-2.70291	-0.568138	-1.9358	-1.45829
Cnl1_1295	0.369704	68.4743	0	1713.47	29292.9	0	0	0	0
Cnl1_1294	0.184852	52.4146	0	1090.71	23680	0	0	0	0
Cnl1_1293	0	0	0	0	0	0	0	0	0
Cnl1_1292	0	0	0.0911814	0.131079	0.243343	0	0	0.523627	1.41618
Cnl1_1291	0	0.08824	0.273544	0.131079	0	0	-1.63227	-1.06134	0
Cnl1_1290	0.0924259	89.4754	0	61.3451	598.016	0	0	0	0
TCN3-LTR_699	0.184852	0	0	0.131079	0	0	0	0	0
TCN3-LTR_698	0	0.52944	0.455907	0	0.973372	0	0.215729	0	1.09425
TCN3-LTR_697	0.0924259	0.08824	0.0911814	0	0.121672	0.019558	-0.0473059	0	0.416181
TCN3-LTR_696	1.01669	0.4412	0	0	0	0	0	0	0
TCN3-LTR_695	0	0	0.182363	0	0	0	0	0	0
TCN6-I_917	759.833	7005.91	3244.42	1.57295	2291.2	-2.0942	1.11061	-11.0103	-0.501857
Cnl1_1289	0.277278	94.5933	0	3649.24	14335.1	0	0	0	0
Cnl1_1288	0.369704	90.2696	0	2768.52	23107.3	0	0	0	0
TCN3-I_778	8.41076	2.73544	1.55008	0.655396	41.2467	2.43989	0.819428	-1.24191	4.73386
Harbinger-2_SLL_750	0.0924259	0.17648	0.0911814	0	0.121672	0.019558	0.952694	0	0.416181
TCN2-I_773	0.924259	4.23552	3.19135	1.96619	1.21672	-1.7878	0.408374	-0.698765	-1.39117
TCN2-I_772	760.111	7009.7	3247.33	2468.88	1.82507	-2.09497	1.1101	-0.395401	-10.7971
TCN2-I_771	0.0924259	0.26472	0	0.524317	0	0	0	0	0
TCN2-I_770	0.184852	2.11776	0.547088	0.917554	0.121672	-1.5654	1.95269	0.74602	-2.16878
TCN10-LTR_597	0.184852	0.35296	0	0	0	0	0	0	0
TCN1-LTR_988	0.46213	5.2944	0.0911814	0.393238	0	2.34149	5.85958	2.10859	0
TCN1-LTR_987	0	0	0.273544	0.262158	0	0	0	-0.0613352	0
TCN1-LTR_986	0	0	0	0	0	0	0	0	0
TCN4-LTR_107	0.646981	1.7648	0	0	0.486686	0	0	0	0
TCN4-LTR_106	0.369704	1.7648	0	0	0.486686	0	0	0	0
TCN4-LTR_105	0.46213	1.7648	0	0	0.486686	0	0	0	0
TCN2-I_769	0	0	0.0911814	0	0	0	0	0	0
TCN4-LTR_104	0.369704	1.50008	0	0	0.365015	0	0	0	0
TCN2-I_768	0.184852	0.4412	0.63827	0	0.121672	-1.7878	-0.532733	0	-2.39117
TCN4-LTR_103	0.554555	1.23536	0	0.131079	0.486686	0	0	0	0
TCN2-I_767	0.739407	0.52944	0.63827	0.524317	1.82507	0.212203	-0.269698	-0.283728	1.51572
TCN3-LTR_303	0.184852	0.70592	0.364726	0	0.121672	-0.980442	0.952694	0	-1.58382
TCN4-LTR_102	1.20154	1.23536	0	0	0.486686	0	0	0	0
TCN2-I_766	0.184852	0	0.273544	0.262158	0	-0.565404	0	-0.0613352	0
TCN3-LTR_302	0.184852	0.08824	0	0	0	0	0	0	0
TCN4-LTR_101	0.46213	1.67656	0	0	0.486686	0	0	0	0
TCN2-I_765	0	0.35296	0.182363	0.524317	0	0	0.952694	1.52363	0
TCN3-LTR_301	0.0924259	0.08824	0.0911814	0	0	0.019558	-0.0473059	0	0
TCN4-LTR_100	0.831833	1.7648	0	0	0.486686	0	0	0	0
TCN3-LTR_300	0.184852	0.52944	0.455907	0.262158	0.121672	-1.30237	0.215729	-0.798301	-1.90575
PIF_Harbinger-1_CryNeo_1246	0	0.08824	0.0911814	0	0	0	-0.0473059	0	0
TCN10-LTR_1072	0	0.61768	0.455907	0.131079	0	0	0.438121	-1.7983	0
PIF_Harbinger-1_CryNeo_1245	0.184852	0.79416	0.820632	0.655396	0	-2.15037	-0.0473059	-0.32437	0
PIF_Harbinger-1_CryNeo_1244	0	0.35296	0.0911814	0	0.365015	0	1.95269	0	2.00114
PIF_Harbinger-1_CryNeo_1243	0	0.17648	0.0911814	0.131079	0	0	0.952694	0.523627	0
PIF_Harbinger-1_CryNeo_1242	0	0.08824	0.0911814	0	0	0	-0.0473059	0	0
TCN2-I_1331	0.831833	4.67672	3.37371	0.524317	2.43343	-2.01997	0.471161	-2.68583	-0.471345
TCN2-I_1330	4.34402	13.589	8.20632	6.9472	3.16346	-0.917706	0.727628	-0.240305	-1.37523
TCN2-LTR_777	0	0.17648	0.0911814	0	0.243343	0	0.952694	0	1.41618
TCN2-LTR_776	0.184852	0.70592	0.911814	0.393238	0	-2.30237	-0.369234	-1.21334	0
TCN2-LTR_775	0.184852	0	0	0	0	0	0	0	0
TCN2-LTR_774	0.184852	0.35296	0.182363	0.131079	0	0.019558	0.952694	-0.476373	0
TCN2-I_1329	69.0422	86.74	94.0992	251.541	0	-0.446705	-0.117486	1.41854	0
Cnl1_856	1.01669	1.85304	1.09418	0.655396	0.243343	-0.105973	0.760049	-0.739407	-2.16878
TCN2-I_1328	0.184852	0.70592	0.273544	0.131079	0	-0.565404	1.36773	-1.06134	0
TCN760_1177	0	0.17648	0.273544	0	0	0	-0.632268	0	0
Cnl1_855	1.38639	2.55896	2.64426	1.04863	0	-0.931532	-0.0473059	-1.33435	0
TCN760_1176	0	0.08824	0.0911814	0.131079	0	0	-0.0473059	0.523627	0
Cnl1_854	68.3027	0.08824	0	0	0.121672	0	0	0	0
Cnl1_853	0	0.17648	0.182363	0	0	0	-0.0473059	0	0
Cnl1_852	0	0.97064	0.547088	0.524317	0.121672	0	0.827163	-0.0613352	-2.16878
Cnl1_851	0.369704	0.97064	0.182363	0.655396	0	1.01956	2.41213	1.84556	0
Cnl1_850	1348.22	0.26472	0.182363	0.393238	0.121672	12.852	0.537657	1.10859	-0.583819
TCN1-LTR_605	0	0	0	0	0	0	0	0	0
TCN1-LTR_604	0.0924259	0.8824	0.273544	0.131079	0	-1.5654	1.68966	-1.06134	0
TCN1-LTR_603	0.0924259	0.17648	0.182363	0.524317	0	-0.980442	-0.0473059	1.52363	0
TCN1-LTR_1147	0.924259	1.3236	0.0911814	0	0	3.34149	3.85958	0	0
TCN1-LTR_1146	0.184852	0.4412	0.547088	0.524317	0	-1.5654	-0.31034	-0.0613352	0
TCN1-LTR_602	0	0	0	0	0	0	0	0	0
TCN1-LTR_1145	0.554555	10.5006	9.84759	0.393238	2.5551	-4.15037	0.0926244	-4.6463	-1.94639
TCN1-LTR_601	0	0.08824	0.0911814	0	0	0	-0.0473059	0	0
TCN1-LTR_1144	0.0924259	0.26472	0.0911814	0	0.121672	0.019558	1.53766	0	0.416181
TCN1-LTR_600	0.0924259	0.08824	0	0	0	0	0	0	0
TCN1-LTR_1143	0.184852	0.61768	0.820632	0.786475	0.486686	-2.15037	-0.409876	-0.0613352	-0.753744
TCN1-I_759	0.0924259	0.17648	0	0	0.243343	0	0	0	0
TCN1-I_758	0	0.17648	0	0	0	0	0	0	0
Copia-1_SLL-I_577	0	0	0.0911814	0.131079	0	0	0	0.523627	0
Cnl1_849	0.46213	1.58832	1.18536	1.44187	0	-1.35895	0.422179	0.282619	0
Cnl1_848	0.46213	1.14712	1.73245	0.524317	0.730029	-1.90644	-0.594794	-1.7243	-1.24678
Cnl1_847	0.46213	0.35296	0.364726	0.131079	0.243343	0.341486	-0.0473059	-1.47637	-0.583819
Cnl1_846	0.184852	1.3236	1.18536	1.04863	0.851701	-2.68088	0.159145	-0.176812	-0.476904
Cnl1_845	0	0	0	0	0	0	0	0	0
Cnl1_844	461.113	0	0	0	0	0	0	0	0
Cnl1_843	44.1796	0	0.0911814	0	0	8.92042	0	0	0
Cnl1_842	2.58793	0.17648	0	0.262158	0.243343	0	0	0	0
Cnl1_841	148.436	0.4412	0	0	0.243343	0	0	0	0
Cnl1_840	0	0	0.0911814	0.131079	0	0	0	0.523627	0
Gypsy-119_MLP-I_1309	0	0.52944	0.182363	0.393238	0.121672	0	1.53766	1.10859	-0.583819
TCN5-LTR_236	0	0.35296	0	0	0.121672	0	0	0	0
TCN5-LTR_235	0.0924259	0	0.0911814	0	0	0.019558	0	0	0
TCN6-LTR_395	0	0.08824	0	0	0	0	0	0	0
TCN5-LTR_234	0	0.08824	0	0	0	0	0	0	0
TCN5-LTR_233	0.184852	0.17648	0.0911814	0.393238	0	1.01956	0.952694	2.10859	0
TCN5-LTR_232	0	0	0.0911814	0	0	0	0	0	0
TCN5-LTR_231	0.0924259	0.08824	0.182363	0.131079	0	-0.980442	-1.04731	-0.476373	0
TCN4-LTR_792	0	0.08824	0	0	0.365015	0	0	0	0
TCN4-LTR_791	0.184852	0.17648	0.182363	0	0.243343	0.019558	-0.0473059	0	0.416181
Cnl1_839	0.184852	0.52944	0.547088	0.655396	0	-1.5654	-0.0473059	0.260593	0
TCN4-LTR_790	0.0924259	0	0	0	0.121672	0	0	0	0
Cnl1_838	0.369704	4.32376	0.0911814	0.262158	0.121672	2.01956	5.5674	1.52363	0.416181
Cnl1_837	0	0.08824	0	0	0.486686	0	0	0	0
Cnl1_836	0.0924259	0.4412	0.0911814	0	0	0.019558	2.27462	0	0
Cnl1_1228	0.369704	0.52944	1.4589	0	0.730029	-1.98044	-1.46234	0	-0.998857
Cnl1_835	0	0.17648	0.182363	0	0	0	-0.0473059	0	0
Cnl1_1227	3521.8	5.82384	3.73844	125.05	1767.28	9.87966	0.639536	5.06392	8.88488
Cnl1_834	0	0	0	0	0	0	0	0	0
Cnl1_1226	0.46213	5.20616	5.65325	0.655396	2.19009	-3.61271	-0.118859	-3.10864	-1.36809
Cnl1_833	0	0	0.0911814	0	0	0	0	0	0
Cnl1_1225	0.184852	1.23536	1.91481	0.786475	0.973372	-3.37276	-0.632268	-1.28373	-0.976137
Cnl1_832	0	0.26472	0.182363	7.99583	0	0	0.537657	5.45436	0
Cnl1_1224	0.277278	4.94144	2.55308	1.44187	1.58173	-3.20283	0.952694	-0.824296	-0.690735
Cnl1_831	0.0924259	0	0.0911814	0	0	0.019558	0	0	0
Cnl1_1223	12.4775	51.7087	1.82363	3.27698	19.1024	2.77445	4.82552	0.845555	3.38887
Cnl1_830	0.184852	0.35296	0.182363	0	0	0.019558	0.952694	0	0
Cnl1_1222	13.8639	1000.38	0	26639.4	150979	0	0	0	0
Cnl1_1221	17.7458	1222.83	0	29198.8	112268	0	0	0	0
Cnl1_1220	0.0924259	0.26472	0.0911814	0.262158	0	0.019558	1.53766	1.52363	0
Gypsy-10_MLP-I_859	0	0	0	0	0	0	0	0	0
TCN4-LTR_789	0.0924259	0.08824	0.182363	0	0.243343	-0.980442	-1.04731	0	0.416181
TCN6-LTR_1175	0	0	0.0911814	0	0	0	0	0	0
Cnl1_829	0	0.26472	0.273544	0	0.243343	0	-0.0473059	0	-0.168782
Cnl1_828	0.0924259	103.417	0	3860.28	9700.51	0	0	0	0
Cnl1_827	0.0924259	76.6806	0	2494.04	11774.9	0	0	0	0
Cnl1_1219	0.0924259	0	0.0911814	0	0.121672	0.019558	0	0	0.416181
Cnl1_826	0.184852	47.6496	0	1094.77	21479.9	0	0	0	0
Cnl1_1218	0	0.08824	0.182363	0.131079	0	0	-1.04731	-0.476373	0
Cnl1_825	0.184852	46.4143	0	1019.4	16819.9	0	0	0	0
Gypsy-84_MLP-I_1055	0	0	0.273544	0	0	0	0	0	0
Cnl1_1217	0.277278	0.52944	0.63827	0.131079	0.365015	-1.20283	-0.269698	-2.28373	-0.806212
Cnl1_824	0.0924259	0.52944	0.0911814	0	0.121672	0.019558	2.53766	0	0.416181
Cnl1_1216	0.0924259	1.3236	1.27654	0	0.243343	-3.7878	0.0522298	0	-2.39117
Cnl1_823	0.369704	0.97064	1.18536	0.524317	0.365015	-1.68088	-0.288314	-1.17681	-1.6993
Cnl1_1215	14.326	375.02	0	17142	63219.7	0	0	0	0
Cnl1_822	1736.5	1.3236	0.0911814	0.786475	0.365015	14.2171	3.85958	3.10859	2.00114
Cnl1_1214	0.924259	373.167	0	5911.15	93244.7	0	0	0	0
Cnl1_821	212.025	22.3247	0.0911814	0	23.4826	11.1832	7.93569	0	8.00864
Cnl1_1213	0.0924259	0.26472	0.455907	0.262158	0	-2.30237	-0.784271	-0.798301	0
Cnl1_820	3.88189	770.424	0	7245.66	66671.5	0	0	0	0
Cnl1_1212	0	0.17648	0.273544	0	0	0	-0.632268	0	0
Cnl1_1211	2.1258	918.491	0	18287	75469	0	0	0	0
Cnl1_1210	0.739407	1.67656	2.27953	0.131079	1.21672	-1.6243	-0.443235	-4.12023	-0.905747
TCN3-LTR_618	0.46213	0.70592	0.455907	0.655396	0.243343	0.019558	0.630766	0.523627	-0.905747
TCN3-LTR_617	0.184852	0.08824	0.182363	0	0	0.019558	-1.04731	0	0
Cnl1_819	9760.36	3.00016	3.37371	0.917554	6.69194	11.4984	-0.169296	-1.87847	0.988087
Cnl1_818	707.151	7.41216	0.364726	1.44187	2.67677	10.921	4.34501	1.98306	2.87561
Cnl1_817	3034.16	2.55896	0	0.655396	0.973372	0	0	0	0
Cnl1_1209	0	0.26472	0.0911814	0	0.121672	0	1.53766	0	0.416181
Cnl1_816	58.5056	0.26472	0.0911814	0	0	9.32562	1.53766	0	0
Cnl1_1208	0.369704	0.61768	1.36772	0.524317	0.486686	-1.88733	-1.14684	-1.38326	-1.49071
Cnl1_815	3434.18	1.05888	1.64126	1.31079	0.121672	11.0309	-0.632268	-0.32437	-3.75374
Cnl1_1207	0	0	0.0911814	0	0	0	0	0	0
Cnl1_814	2.68035	0.97064	0.547088	0.524317	0.121672	2.29258	0.827163	-0.0613352	-2.16878
Cnl1_1206	0	0	0.0911814	0	0	0	0	0	0
Cnl1_813	0.0924259	1.14712	1.003	0	0.121672	-3.43987	0.193702	0	-3.04325
Cnl1_1205	0	0	0.273544	0	0	0	0	0	0
Copia-6_Trm-I_581	0	0.4412	0.273544	0	0.243343	0	0.68966	0	-0.168782
Cnl1_812	0.184852	0.97064	1.09418	0.655396	0.365015	-2.5654	-0.172837	-0.739407	-1.58382
Cnl1_1204	0.0924259	0	0.273544	0	0	-1.5654	0	0	0
Copia-6_Trm-I_580	0	0.17648	0.0911814	0	0	0	0.952694	0	0
Cnl1_811	1.20154	1.7648	1.91481	2.22835	1.09504	-0.67232	-0.117695	0.218773	-0.806212
Gypsy-20_BG-I_670	0	0	0	0	0	0	0	0	0
Cnl1_1203	0	0	0.0911814	0	0	0	0	0	0
Cnl1_810	2486.63	16906.9	21.61	7197.82	4.13683	6.84635	9.6117	8.37972	-2.3851
Cnl1_1202	0.184852	0.70592	0.729451	2.09727	0.121672	-1.98044	-0.0473059	1.52363	-2.58382
Cnl1_1201	0.554555	0.26472	0.182363	0.393238	0	1.60452	0.537657	1.10859	0
Cnl1_1200	0	0.17648	0	0	0	0	0	0	0
TCN760_396	0	0.08824	0.182363	0	0	0	-1.04731	0	0
LTR11_CN_1138	0.0924259	0.08824	0.273544	0.262158	0	-1.5654	-1.63227	-0.0613352	0
LTR11_CN_1137	0	0.08824	0	0.393238	0	0	0	0	0
LTR11_CN_1136	0	0	0	0	0	0	0	0	0
TCN4-I_98	0	0.08824	0	0	0	0	0	0	0
TCN4-I_97	0	0.08824	0	0	0	0	0	0	0
Copia-6_Trm-I_579	0	0.61768	0.273544	0.131079	0.121672	0	1.17509	-1.06134	-1.16878
TCN4-I_96	421.37	1.14712	0.273544	0.131079	0.365015	10.5891	2.06817	-1.06134	0.416181
Cnl1_809	2.31065	1.14712	0.911814	0.131079	1.21672	1.34149	0.331206	-2.7983	0.416181
TCN4-I_95	6876.21	8.29456	0.63827	1.04863	6.20525	13.3952	3.69993	0.716272	3.28125
Cnl1_808	0.184852	1.05888	1.09418	0.131079	0.121672	-2.5654	-0.0473059	-3.06134	-3.16878
TCN4-I_94	7255.25	8.02984	0.729451	1.17971	6.20525	13.2799	3.46049	0.693552	3.08861
Cnl1_807	3521.98	3.70608	1.4589	111.548	1767.4	11.2373	1.34501	6.25664	10.2425
TCN4-I_93	3301.36	0.52944	0	0.393238	0.486686	0	0	0	0
Cnl1_806	0.0924259	1.41184	1.36772	0.655396	0	-3.88733	0.0458035	-1.06134	0
TCN4-I_92	3474.94	0.52944	0	0.393238	0.486686	0	0	0	0
Cnl1_805	0	1.58832	2.00599	0.393238	1.7034	0	-0.336812	-2.35084	-0.235896
TCN4-I_91	96.7699	0.17648	0.0911814	0.393238	0.608358	10.0516	0.952694	2.10859	2.73811
Cnl1_804	10.8138	51.091	1.64126	1.44187	15.8173	2.72	4.96019	-0.186866	3.26862
Cnl1_803	17.4685	1486.49	0	34962.1	127955	0	0	0	0
Cnl1_802	0.831833	732.481	0	5068.7	64608.4	0	0	0	0
Cnl1_801	3.78946	936.492	0	7728.56	66694	0	0	0	0
Zisupton-2_PGr_541	0	0.08824	0.0911814	0	0	0	-0.0473059	0	0
TCN10-LTR_870	0	0.26472	0.0911814	0	0	0	1.53766	0	0
TCN2-LTR_1151	0	0.08824	0	0	0	0	0	0	0
TCN2-LTR_1150	0.184852	0.08824	0.0911814	0.131079	0.121672	1.01956	-0.0473059	0.523627	0.416181
HARBINGER1_CN_587	0.0924259	0	0	0	0.121672	0	0	0	0
TCN3-I_1086	0.46213	1.67656	2.9178	3.1459	0.851701	-2.65851	-0.799378	0.10859	-1.77646
TCN760_1102	0.0924259	0	0	0	0	0	0	0	0
TCN760_1101	0.277278	2.02952	0.0911814	0.786475	0	1.60452	4.47626	3.10859	0
TCN10-LTR_869	0	0	0	0	0	0	0	0	0
TCN10-LTR_868	0	0	0	0	0	0	0	0	0
TCN5-LTR_527	0	0.26472	0.182363	0	0	0	0.537657	0	0
TCN5-LTR_526	0	0.26472	0.182363	0.131079	0	0	0.537657	-0.476373	0
LTR11_CN_594	0	0.17648	0	0	0	0	0	0	0
LTR11_CN_593	0	1.94128	1.003	0	0.608358	0	0.952694	0	-0.721323
LTR11_CN_592	0.0924259	0	0	0	0.121672	0	0	0	0
LTR11_CN_591	0.924259	0.26472	0.547088	0	0.121672	0.756524	-1.04731	0	-2.16878
LTR11_CN_590	0	0.08824	0.273544	0	0	0	-1.63227	0	0
LTR11_CN_589	0	0.26472	0.182363	0.131079	0	0	0.537657	-0.476373	0
LTR12_CN_1241	0	0.08824	0.182363	0	0.121672	0	-1.04731	0	-0.583819
TCN4-LTR_710	0	0.35296	0.547088	0.524317	0	0	-0.632268	-0.0613352	0
TCN10-LTR_1320	0	0.08824	0.0911814	0	0	0	-0.0473059	0	0
SSU-rRNA_Sce_192	0	0	0	0	0	0	0	0	0
SSU-rRNA_Sce_191	0	0	0	0	0	0	0	0	0
TCN3-LTR_903	0.0924259	0	0	0	0	0	0	0	0
SSU-rRNA_Sce_190	0.369704	2.38248	2.18835	1.17971	1.21672	-2.5654	0.122619	-0.89141	-0.846854
TCN10-LTR_1319	0.184852	0.26472	0.364726	0	0	-0.980442	-0.462343	0	0
TCN3-LTR_902	0	0	0.0911814	0	0	0	0	0	0
TCN3-LTR_901	0.184852	0	0.0911814	0.131079	0	1.01956	0	0.523627	0
TCN3-LTR_900	0.277278	0.79416	0.820632	0.393238	0	-1.5654	-0.0473059	-1.06134	0
TCN10-LTR_69	1.20154	0.52944	0.0911814	0.131079	0	3.72	2.53766	0.523627	0
TCN10-LTR_68	0.554555	0.4412	0	0.131079	0	0	0	0	0
TCN10-LTR_67	1.10911	0.70592	0	0	0	0	0	0	0
Gypsy-3_PCR-I_465	0	0	0.0911814	0	0.121672	0	0	0	0.416181
Gypsy-1_TMe-I_347	0	0.08824	0	0	0	0	0	0	0
SSU-rRNA_Sce_189	0.0924259	0.70592	0.729451	0.131079	0.486686	-2.98044	-0.0473059	-2.47637	-0.583819
SSU-rRNA_Sce_188	0.46213	0.52944	0.547088	0	0.486686	-0.243476	-0.0473059	0	-0.168782
SSU-rRNA_Sce_187	7.1168	117.977	2.4619	2.62158	25.916	1.53146	5.58259	0.0906679	3.396
SSU-rRNA_Sce_186	0.554555	0.97064	0.63827	0.393238	5.35355	-0.202834	0.604771	-0.698765	3.06826
SSU-rRNA_Sce_185	0.369704	1.85304	3.10017	1.44187	0	-3.0679	-0.742451	-1.1044	0
SSU-rRNA_Sce_184	5.3607	0.4412	0.63827	0.655396	0.121672	3.07018	-0.532733	0.0382005	-2.39117
SSU-rRNA_Sce_183	0.184852	1.50008	2.00599	0	1.58173	-3.43987	-0.419275	0	-0.342811
SSU-rRNA_Sce_182	0.369704	0.8824	1.09418	0.524317	0.121672	-1.5654	-0.31034	-1.06134	-3.16878
TCN1-I_1142	0.0924259	0.4412	0.273544	0.393238	0	-1.5654	0.68966	0.523627	0
TCN6-I_242	0	0	0	0	0	0	0	0	0
TCN1-I_1141	0	0.4412	0.182363	0.262158	0	0	1.27462	0.523627	0
TCN6-I_241	0	0.17648	0	0	0	0	0	0	0
TCN6-I_240	0.831833	4.76496	4.74143	3.1459	1.58173	-2.51096	0.0071419	-0.59185	-1.58382
TCN5-I_1010	0.0924259	0.08824	0.0911814	0	0	0.019558	-0.0473059	0	0
TCN3-LTR_1161	0	0.26472	0.182363	0.131079	0.243343	0	0.537657	-0.476373	0.416181
TCN3-LTR_1160	0.184852	0.17648	0.182363	0.393238	0	0.019558	-0.0473059	1.10859	0
TCN6-I_239	1.29396	3.17664	2.27953	0.131079	1.09504	-0.816943	0.478763	-4.12023	-1.05775
TCN6-I_238	0	0.17648	0.182363	0.131079	0	0	-0.0473059	-0.476373	0
TCN6-I_237	0	0	0.0911814	0	0.121672	0	0	0	0.416181
TCN3-LTR_1159	0.0924259	0.35296	0.182363	0	0.243343	-0.980442	0.952694	0	0.416181
TCN3-LTR_1158	0.277278	0.35296	0	1.83511	2.67677	0	0	0	0
TCN3-LTR_1157	1.20154	5.11792	7.38569	0	3.4068	-2.61985	-0.529175	0	-1.11631
TCN760_306	0	0.4412	0	0	0	0	0	0	0
TCN760_305	0	0	0	0	0	0	0	0	0
TCN6-LTR_635	0	0.52944	0.729451	0.131079	0	0	-0.462343	-2.47637	0
TCN6-LTR_634	0.0924259	0.26472	0	0	0	0	0	0	0
TCN6-LTR_633	0.0924259	0.26472	0.547088	0.393238	0	-2.5654	-1.04731	-0.476373	0
Copia-6_Trm-I_1135	0.0924259	0.4412	0.273544	0.524317	0	-1.5654	0.68966	0.938665	0
Gypsy-1_Trm-I_1053	0	0	0	0	0	0	0	0	0
TCN3-I_1005	0.0924259	0.4412	0.729451	0	0.365015	-2.98044	-0.725378	0	-0.998857
CACTA-1_Ccinerea_397	0	0	0	0	0	0	0	0	0
TCN3-I_1004	0.369704	0.17648	0.182363	0.524317	0.243343	1.01956	-0.0473059	1.52363	0.416181
TCN3-I_1003	0	0	0	0	0	0	0	0	0
Copia-58_BG-I_1047	0	0.08824	0	0	0.121672	0	0	0	0
TCN3-I_1002	0.0924259	0.70592	0.364726	0.131079	0.121672	-1.98044	0.952694	-1.47637	-1.58382
TCN3-I_1001	8.78046	6.618	7.20333	34.9981	0	0.285633	-0.122268	2.28054	0
TCN1-LTR_290	0	0	0	0	0	0	0	0	0
TCN760_639	0.554555	1.23536	2.64426	4.71885	0.121672	-2.25346	-1.09793	0.835571	-4.4418
TCN760_638	0	0	0	0	0	0	0	0	0
TCN760_637	0	0	0	0	0	0	0	0	0
TCN760_636	0	0.17648	0	0.131079	0	0	0	0	0
TCN1-LTR_289	0	0.08824	0	0	0	0	0	0	0
TCN1-LTR_288	0.184852	0.26472	0	1.04863	0	0	0	0	0
TCN1-LTR_287	0	0.79416	0.455907	1.04863	0	0	0.800691	1.2017	0
TCN1-LTR_286	0.0924259	0	0.0911814	0	0	0.019558	0	0	0
TCN1-LTR_285	0	0	0	0	0	0	0	0	0
TCN1-LTR_284	0.0924259	1.05888	1.09418	0.131079	0.365015	-3.5654	-0.0473059	-3.06134	-1.58382
TCN3-I_1340	0	0	0	0	0	0	0	0	0
TCN1-LTR_283	0	0.08824	0	0	0	0	0	0	0
LTR11_CN_866	0.184852	0	0	0	0	0	0	0	0
LTR11_CN_865	0	0.17648	0.0911814	0	0	0	0.952694	0	0
TCN3-I_1339	1.38639	5.55912	3.9208	3.1459	0.973372	-1.49982	0.503709	-0.317675	-2.01008
LTR11_CN_864	0	0	0	0	0	0	0	0	0
TCN3-I_1338	172.467	0.08824	0.0911814	0	0	10.8853	-0.0473059	0	0
LTR11_CN_863	0	0.17648	0.364726	0	0	0	-1.04731	0	0
TCN3-I_1337	26.5262	196.952	2.73544	202.255	3.16346	3.27757	6.16992	6.20826	0.20973
LTR11_CN_862	0	0.17648	0.182363	0	0	0	-0.0473059	0	0
TCN3-I_1336	2.31065	0.70592	0.63827	0.393238	0	1.85606	0.145339	-0.698765	0
LTR11_CN_861	0.0924259	0.08824	0.0911814	0	0	0.019558	-0.0473059	0	0
TCN3-I_1335	0	0.08824	0	0	0	0	0	0	0
LTR11_CN_860	0	0	0	0	0.121672	0	0	0	0
TCN5-I_109	0.0924259	0.35296	0	0.131079	0.121672	0	0	0	0
TCN5-I_108	180.323	0.26472	0	0.393238	0	0	0	0	0
PCretro3_I-int_596	0	0.35296	0.0911814	0.131079	0.243343	0	1.95269	0.523627	1.41618
Cnl1_152	29.5763	1.23536	1.003	0.393238	0.121672	4.88205	0.300617	-1.35084	-3.04325
Cnl1_151	0.46213	4.32376	4.92379	1.04863	4.13683	-3.4134	-0.187484	-2.23126	-0.251244
Cnl1_150	0.369704	1.14712	0.729451	0.131079	1.09504	-0.980442	0.653134	-2.47637	0.586106
TCN4-LTR_1166	0	0.08824	0.364726	0.131079	0.121672	0	-2.04731	-1.47637	-1.58382
TCN4-LTR_1165	0.0924259	0	0.0911814	0.262158	0	0.019558	0	1.52363	0
TCN4-LTR_1164	0	0.08824	0	0.131079	0	0	0	0	0
CT-rich_582	0	1.7648	0.547088	0.131079	0.973372	0	1.68966	-2.06134	0.831218
Cnl1_149	0.184852	0.97064	2.55308	0.655396	1.33839	-3.7878	-1.39523	-1.9618	-0.931743
Cnl1_148	0.277278	4.67672	2.37072	1.57295	1.7034	-3.09592	0.980175	-0.59185	-0.476904
Cnl1_147	12.4775	51.7969	1.82363	2.62158	19.1024	2.77445	4.82798	0.523627	3.38887
Cnl1_146	25.602	1595.47	0	47631.6	182129	0	0	0	0
Cnl1_145	18.3928	1255.39	0	29645.7	107487	0	0	0	0
Cnl1_144	17.6533	1214.89	0	28610	99171.6	0	0	0	0
Cnl1_143	15.4351	1020.5	0.0911814	25472.9	93183.9	7.40326	13.4502	18.0918	19.9629
Cnl1_142	0	0.08824	0.182363	0	0	0	-1.04731	0	0
Cnl1_141	0	0.08824	0	0.131079	0	0	0	0	0
Cnl1_140	0	0.4412	0.455907	0.131079	0.121672	0	-0.0473059	-1.7983	-1.90575
PIF_Harbinger-1_CryNeo_181	0.184852	0.17648	0.0911814	0.131079	0.365015	1.01956	0.952694	0.523627	2.00114
TCN3-LTR_299	0	0.08824	0	0	0	0	0	0	0
TCN3-LTR_298	0	0.08824	0.273544	0	0	0	-1.63227	0	0
TCN3-LTR_297	0.0924259	0	0	0	0	0	0	0	0
Cnl1_139	0	0.17648	0.0911814	0	0.121672	0	0.952694	0	0.416181
Cnl1_138	29019.7	1.94128	8.11514	2.62158	20.9275	11.8041	-2.06361	-1.63018	1.36671
Cnl1_137	0.369704	1.14712	1.4589	0.262158	0.121672	-1.98044	-0.346866	-2.47637	-3.58382
Cnl1_136	101.022	564.56	142.972	135.012	130.189	-0.501074	1.98139	-0.0826539	-0.135134
Cnl1_135	0	66.2683	0	244.069	27806.8	0	0	0	0
Cnl1_134	0	73.2392	0	311.968	29867.6	0	0	0	0
Cnl1_133	6499.21	0.79416	2.55308	0	2.31176	11.3138	-1.68474	0	-0.143247
Cnl1_132	0	0.17648	0	0	0	0	0	0	0
Cnl1_131	0	0.4412	0	0	0.365015	0	0	0	0
Cnl1_130	0	0.26472	0.273544	0.262158	0	0	-0.0473059	-0.0613352	0
Cnl1_9	17.3761	1006.91	0.0911814	29736.9	164729	7.57415	13.4308	18.3151	20.7849
Cnl1_8	14.5109	1026.5	0	30877.9	146489	0	0	0	0
Cnl1_7	18.5776	1128.85	0	34465.3	178858	0	0	0	0
Cnl1_6	18.5776	1122.24	0	34401.9	178835	0	0	0	0
Cnl1_5	0	30.6193	0	1.96619	2.43343	0	0	0	0
Cnl1_4	0	32.2959	0	2.22835	2.79845	0	0	0	0
TCN3-I_375	0	0.08824	0.0911814	0	0	0	-0.0473059	0	0
Cnl1_3	0	31.9429	0	2.35943	2.79845	0	0	0	0
TCN3-I_374	0.924259	2.38248	0.911814	1.31079	0.365015	0.019558	1.38565	0.523627	-1.32078
Cnl1_2	0	32.2959	0	2.22835	2.79845	0	0	0	0
TCN3-I_373	0.0924259	0	0	0	0	0	0	0	0
Cnl1_1	0	54.0029	0	11.4039	4.01516	0	0	0	0
TCN3-I_372	0	0.17648	0	0.131079	0	0	0	0	0
Copia-18_MLP-I_972	0	0	0	0	0	0	0	0	0
TCN3-I_371	0.646981	2.55896	2.18835	0.917554	0.851701	-1.75805	0.225713	-1.25398	-1.36143
TCN3-I_370	0	0	0	0	0	0	0	0	0
Cnl1_129	3.69704	76.9453	0	4135.42	17974.4	0	0	0	0
Cnl1_128	0	68.0331	0	221.655	26732.6	0	0	0	0
Cnl1_127	0.184852	0.08824	0.182363	0.393238	0.121672	0.019558	-1.04731	1.10859	-0.583819
Copia-8_ADe-I_1051	0.0924259	0.08824	0.273544	0.131079	0	-1.5654	-1.63227	-1.06134	0
Copia-8_ADe-I_1050	0.277278	0.61768	0.63827	0	0.365015	-1.20283	-0.0473059	0	-0.806212
TCN1-LTR_599	0.0924259	0	0	0	0	0	0	0	0
TCN1-LTR_598	0	0.08824	0	0	0	0	0	0	0
TCN3-I_369	0	0.4412	0.273544	0.262158	0	0	0.68966	-0.0613352	0
Copia-8_ADe-I_1049	0	0.08824	0	0	0	0	0	0	0
Copia-8_ADe-I_1048	0	0	0	0.131079	0	0	0	0	0
TCN6-I_1174	0.277278	1.67656	1.18536	1.17971	0.365015	-2.09592	0.500182	-0.00688744	-1.6993
TCN6-I_1173	0.184852	1.14712	1.003	0.393238	2.67677	-2.43987	0.193702	-1.35084	1.41618
TCN6-I_1172	0	0	0	0.131079	0	0	0	0	0
TCN2-I_367	0.0924259	0.8824	0.820632	0.131079	0.243343	-3.15037	0.104697	-2.6463	-1.75374
Gypsy-62_BG-LTR_62	0.277278	1.41184	0	0	0.243343	0	0	0	0
TCN4-I_788	0.369704	0.26472	0.182363	0	0.243343	1.01956	0.537657	0	0.416181
Copia-7_PTrit-I_346	0	0.08824	0	0	0	0	0	0	0
DNA3-3_MLP_584	0	0	0	0	0.121672	0	0	0	0
TCN4-I_787	0.277278	1.58832	1.91481	1.31079	0.121672	-2.7878	-0.269698	-0.546762	-3.97614
DNA3-3_MLP_583	0	0.35296	0.547088	0	0.851701	0	-0.632268	0	0.638573
TCN4-I_786	0.369704	0.70592	1.55008	0.262158	0.121672	-2.0679	-1.13477	-2.56384	-3.67128
TCN4-I_785	4.991	11.03	12.9478	19.924	1.09504	-1.3753	-0.231269	0.621808	-3.56364
TCN4-I_784	0	0.26472	0.182363	0	0.121672	0	0.537657	0	-0.583819
TCN4-I_783	0.0924259	0.08824	0.182363	0	0.121672	-0.980442	-1.04731	0	-0.583819
Cnl1_463	0.739407	2.55896	3.64726	1.04863	2.19009	-2.30237	-0.511253	-1.7983	-0.735822
Cnl1_462	1.29396	8.73576	5.92679	3.8013	1.94674	-2.19545	0.559683	-0.64076	-1.60619
Cnl1_461	0.369704	5.11792	3.37371	1.57295	0.121672	-3.1899	0.601222	-1.10086	-4.79327
Cnl1_460	0.369704	5.02968	2.37072	6.2918	0.851701	-2.68088	1.08514	1.40815	-1.4769
LTR12_CN_356	0	0.4412	0.182363	0	0	0	1.27462	0	0
LTR12_CN_355	0	0.08824	0	0	0	0	0	0	0
TCN1-LTR_213	0.0924259	0.97064	0.911814	0.262158	0.365015	-3.30237	0.0901976	-1.7983	-1.32078
TCN1-LTR_212	0.184852	0.08824	0	0	0	0	0	0	0
TCN1-LTR_211	0.0924259	1.3236	1.003	0.131079	0.365015	-3.43987	0.400153	-2.9358	-1.45829
TCN1-LTR_210	0.0924259	0	0.0911814	0.131079	0.121672	0.019558	0	0.523627	0.416181
TCN760_918	0	0.08824	0	0	0	0	0	0	0
Cnl1_459	0.554555	2.02952	1.55008	0.131079	2.79845	-1.48294	0.388793	-3.56384	0.85228
Cnl1_458	0.277278	1.67656	2.27953	1.57295	0.730029	-3.03934	-0.443235	-0.535266	-1.64271
Cnl1_457	2.03337	0.8824	1.09418	0.131079	0	0.894027	-0.31034	-3.06134	0
Cnl1_456	0.0924259	1.67656	1.82363	1.04863	0	-4.30237	-0.121306	-0.798301	0
Cnl1_455	0	0	0	0	0	0	0	0	0
Cnl1_454	0	0	0	0	0	0	0	0	0
Cnl1_453	0.0924259	0.08824	0.273544	0.131079	0	-1.5654	-1.63227	-1.06134	0
Cnl1_452	1.47881	0.17648	0.0911814	9.4377	0	4.01956	0.952694	6.69355	0
Cnl1_451	0	0.35296	0.364726	0.262158	0	0	-0.0473059	-0.476373	0
Cnl1_450	0.0924259	0.52944	0.455907	0.131079	0.365015	-2.30237	0.215729	-1.7983	-0.320785
TCN1-LTR_209	0	0.08824	0	0.524317	0	0	0	0	0
TCN1-LTR_208	0	0.17648	0.182363	0	0.486686	0	-0.0473059	0	1.41618
TCN1-LTR_207	0.0924259	0.79416	0.364726	2.62158	0.730029	-1.98044	1.12262	2.84556	1.00114
TCN2-LTR_368	0	0.08824	0.0911814	0	0.121672	0	-0.0473059	0	0.416181
TCN1-LTR_206	0	0	0.0911814	0	0	0	0	0	0
Copia-58_BG-I_1306	0	0	0.0911814	0	0	0	0	0	0
PIF_Harbinger-1_CryNeo_492	0	0.08824	0	0	0.365015	0	0	0	0
TCN1-LTR_205	0.184852	0.17648	0.364726	0	0.486686	-0.980442	-1.04731	0	0.416181
PIF_Harbinger-1_CryNeo_491	0	0	0	0	0	0	0	0	0
TCN1-LTR_204	0	0	0.182363	0	0.121672	0	0	0	-0.583819
PIF_Harbinger-1_CryNeo_490	8.41076	92.4756	9.02696	1.04863	77.7481	-0.102004	3.35676	-3.10573	3.1065
TCN1-LTR_203	0.369704	3.9708	3.19135	0	1.09504	-3.10972	0.315264	0	-1.54318
TCN1-LTR_202	0	0	0	0	0	0	0	0	0
TCN1-LTR_201	0	0.08824	0.0911814	0	0	0	-0.0473059	0	0
TCN1-LTR_200	0.184852	0.26472	0.273544	6.02964	0.730029	-0.565404	-0.0473059	4.46223	1.41618
Gypsy-5_PSH-I_976	0	0	0.0911814	0	0	0	0	0	0
TCN3-I_694	0.184852	0.08824	0.182363	0	0.243343	0.019558	-1.04731	0	0.416181
TCN3-I_693	0.0924259	0.35296	0.455907	0	0.243343	-2.30237	-0.369234	0	-0.905747
TCN3-I_692	0.0924259	0.61768	0.820632	0	0.243343	-3.15037	-0.409876	0	-1.75374
TCN1-I_359	0	0	0	0	0	0	0	0	0
TCN1-I_358	0	0.08824	0.0911814	0	0	0	-0.0473059	0	0
TCN1-I_357	1.01669	1.94128	0.547088	0.655396	0.486686	0.894027	1.82716	0.260593	-0.168782
Cnl1_449	0	0.08824	0	0	0	0	0	0	0
Cnl1_448	0	0.08824	0	0	0	0	0	0	0
Cnl1_447	0.46213	134.478	0	4264.53	15606.8	0	0	0	0
Cnl1_446	0	0	0.364726	0	0.365015	0	0	0	0.0011432
Cnl1_445	0.184852	0.26472	0.182363	0	0.365015	0.019558	0.537657	0	1.00114
Cnl1_1199	0	0.08824	0	0.131079	0	0	0	0	0
Cnl1_444	0.277278	0.52944	0.182363	0.131079	0	0.604521	1.53766	-0.476373	0
Cnl1_1198	0.739407	0	0	0	0	0	0	0	0
Cnl1_443	0	0	0.182363	0.131079	0	0	0	-0.476373	0
Cnl1_1197	0.0924259	0.79416	0.729451	1.83511	0	-2.98044	0.122619	1.33098	0
PIF_Harbinger-1_CryNeo_489	0.277278	0	0	0	0	0	0	0	0
Cnl1_442	0	0.08824	0.182363	0.393238	0	0	-1.04731	1.10859	0
Cnl1_1196	0.46213	0.52944	0.63827	0.131079	0.365015	-0.465869	-0.269698	-2.28373	-0.806212
PIF_Harbinger-1_CryNeo_488	0	0	0	0.131079	0	0	0	0	0
Cnl1_441	0.0924259	0.08824	0.0911814	0	0	0.019558	-0.0473059	0	0
Cnl1_1195	0.369704	0.61768	0.455907	0.262158	0.121672	-0.30237	0.438121	-0.798301	-1.90575
PIF_Harbinger-1_CryNeo_487	0	0.08824	0	0	0	0	0	0	0
Cnl1_440	0.554555	1.23536	1.27654	0	1.09504	-1.20283	-0.0473059	0	-0.221249
Cnl1_1194	7.4865	5.64736	6.01797	34.6049	0	0.315014	-0.0917	2.52363	0
Cnl1_1193	0.46213	1.3236	0.911814	0.131079	1.21672	-0.980442	0.537657	-2.7983	0.416181
Cnl1_1192	0.646981	0.79416	1.09418	1.04863	0.121672	-0.75805	-0.462343	-0.0613352	-3.16878
Cnl1_1191	2.40307	6.00032	3.10017	5.11209	0.608358	-0.367465	0.952694	0.721567	-2.34935
TCN1-LTR_74	0.184852	0	0	0.262158	0	0	0	0	0
Cnl1_1190	0.184852	1.58832	1.64126	0.655396	1.21672	-3.15037	-0.0473059	-1.32437	-0.431816
TCN1-LTR_73	48.5236	2.73544	0	1.70403	0.121672	0	0	0	0
TCN1-LTR_72	32.6263	2.38248	0	1.70403	0.365015	0	0	0	0
TCN1-LTR_71	69.874	2.47072	0.0911814	1.17971	0.608358	9.5818	4.76005	3.69355	2.73811
CACTA-1_Ccinerea_640	0	0	0	0	0	0	0	0	0
TCN4-I_1163	136.421	23.0307	1.73245	0.524317	5.35355	6.29911	3.73267	-1.7243	1.62768
TCN4-I_1162	0	0.08824	0	0	0	0	0	0	0
Cnl1_439	0	0.26472	0.182363	0	0.121672	0	0.537657	0	-0.583819
Cnl1_438	0.369704	0.97064	0.455907	0.393238	0.121672	-0.30237	1.0902	-0.213338	-1.90575
Cnl1_437	0.184852	0.52944	0.364726	0.262158	0	-0.980442	0.537657	-0.476373	0
Cnl1_436	0	293.663	0	412.899	31250.2	0	0	0	0
Cnl1_435	0.369704	0.26472	0.547088	0	0.121672	-0.565404	-1.04731	0	-2.16878
Cnl1_1189	0	1.58832	0.820632	0.393238	0.486686	0	0.952694	-1.06134	-0.753744
Cnl1_434	0.277278	0.97064	0.364726	0.262158	0.851701	-0.395479	1.41213	-0.476373	1.22354
Cnl1_1188	1.01669	3.00016	4.01198	1.17971	0.730029	-1.98044	-0.419275	-1.76588	-2.45829
Cnl1_433	0.831833	3.17664	1.64126	0.655396	0.486686	-0.980442	0.952694	-1.32437	-1.75374
Cnl1_1187	1.47881	5.82384	3.55607	4.58777	1.09504	-1.26584	0.711686	0.367508	-1.6993
Cnl1_432	0	0.97064	0.455907	0	0.121672	0	1.0902	0	-1.90575
Cnl1_1186	0.46213	0.79416	1.09418	0.262158	0.121672	-1.24348	-0.462343	-2.06134	-3.16878
Cnl1_431	0.0924259	0	0.0911814	0	0.243343	0.019558	0	0	1.41618
Cnl1_1185	0.277278	0.8824	0.63827	0.917554	0.243343	-1.20283	0.467267	0.523627	-1.39117
Cnl1_430	0.46213	0.79416	0.547088	0.393238	0.973372	-0.243476	0.537657	-0.476373	0.831218
Cnl1_1184	4.15917	796.896	0	9035.94	64073.5	0	0	0	0
Cnl1_1183	0	0.26472	0.0911814	0	0	0	1.53766	0	0
Cnl1_1182	0.184852	313.429	0	3963.31	4087.68	0	0	0	0
Cnl1_1181	0	0	0.0911814	0.131079	0.243343	0	0	0.523627	1.41618
Cnl1_1180	0.184852	61.1503	0	1064.63	16390.1	0	0	0	0
TCN1-LTR_1084	0.924259	1.67656	2.55308	0	2.79845	-1.46587	-0.606733	0	0.132388
TCN1-LTR_1083	0	0.26472	0.820632	0	0.365015	0	-1.63227	0	-1.16878
TCN1-LTR_1082	4.25159	4.05904	2.09717	6.81612	0.121672	1.01956	0.952694	1.70051	-4.10738
TCN1-LTR_1081	0.369704	0.61768	0.820632	3.1459	0	-1.15037	-0.409876	1.93866	0
TCN3-LTR_225	0	0.79416	0.0911814	0	0	0	3.12262	0	0
TCN1-LTR_1080	4.43644	3.61784	2.4619	0	2.79845	0.849633	0.555359	0	0.184855
TCN2-I_688	1.20154	0.61768	1.27654	0.393238	0	-0.0873572	-1.04731	-1.69877	0
TCN3-LTR_224	0.0924259	0.08824	0.273544	0.131079	0	-1.5654	-1.63227	-1.06134	0
TCN2-I_687	0	0	0.0911814	0	0.121672	0	0	0	0.416181
TCN3-LTR_223	0.0924259	0.35296	0.455907	0.131079	0	-2.30237	-0.369234	-1.7983	0
Copia-6_Trm-I_60	0	4.50024	4.28553	1.17971	0	0	0.0705306	-1.86104	0
TCN2-I_686	0.369704	0.26472	0.455907	0.131079	0	-0.30237	-0.784271	-1.7983	0
TCN3-LTR_222	0	0.61768	0.0911814	0	0.121672	0	2.76005	0	0.416181
TCN2-I_685	0.554555	1.67656	1.003	1.31079	0.121672	-0.854911	0.74119	0.386124	-3.04325
TCN3-LTR_221	0.46213	0	0.0911814	0.131079	0	2.34149	0	0.523627	0
TCN2-I_684	0	0	0.273544	0.131079	0	0	0	-1.06134	0
TCN3-LTR_220	0.0924259	0	0.0911814	0	0.121672	0.019558	0	0	0.416181
Cnl1_429	0.46213	2.73544	4.37671	1.31079	0.121672	-3.24348	-0.678072	-1.73941	-5.16878
Cnl1_428	0.0924259	0.26472	0.182363	0	0.365015	-0.980442	0.537657	0	1.00114
Cnl1_427	0.0924259	0.08824	0.364726	0.131079	0	-1.98044	-2.04731	-1.47637	0
Cnl1_426	0.0924259	0	0.0911814	0	0.365015	0.019558	0	0	2.00114
Cnl1_425	0	0	0	0	0	0	0	0	0
Cnl1_1179	0	0.26472	0	0.131079	0	0	0	0	0
Cnl1_424	0	0.17648	0.182363	0	0	0	-0.0473059	0	0
Cnl1_1178	0.277278	321.194	0	5114.19	5677.56	0	0	0	0
Cnl1_423	0	0	0	0	0	0	0	0	0
Cnl1_422	0	1.41184	0.0911814	0	22.6309	0	3.95269	0	7.95534
Cnl1_421	0	0.26472	0.273544	0	0	0	-0.0473059	0	0
Cnl1_420	0.46213	0	0.182363	0.131079	0	1.34149	0	-0.476373	0
Helitron-1_AN_160	0.739407	0	0	0	0	0	0	0	0
LTR12_CN_678	0	0	0	0	0	0	0	0	0
LTR12_CN_677	0	0	0	0	0	0	0	0	0
Copia-4_ADe-I_664	0	0	0	0	0	0	0	0	0
TCN1-LTR_1079	0	0.35296	0.547088	0	0.121672	0	-0.632268	0	-2.16878
LTR12_CN_676	0.0924259	0.26472	0.364726	0.131079	0	-1.98044	-0.462343	-1.47637	0
Copia-6_Trm-I_59	0	0.70592	0.364726	0	0	0	0.952694	0	0
Copia-6_Trm-I_58	0	4.05904	3.64726	2.09727	0.243343	0	0.154328	-0.798301	-3.90575
TCN2-LTR_691	0.554555	0.8824	1.003	0.917554	0.121672	-0.854911	-0.184809	-0.128449	-3.04325
TCN2-LTR_690	6.19254	4.8532	5.01498	0	31.7563	0.304288	-0.0473059	0	2.66273
Harbinger-4D_PSt_1056	0.184852	0.08824	0.0911814	0.131079	0.730029	1.01956	-0.0473059	0.523627	3.00114
Cnl1_419	0	0.08824	0.0911814	0.131079	0.121672	0	-0.0473059	0.523627	0.416181
Cnl1_418	0.0924259	0.17648	0	0	0	0	0	0	0
Cnl1_417	0.0924259	105.8	0	4230.45	11783.4	0	0	0	0
Cnl1_416	0	56.5619	0	12.5836	38.5699	0	0	0	0
Cnl1_415	0.0924259	34.5901	0	872.463	10533.8	0	0	0	0
Cnl1_414	1.01669	5.7356	3.9208	1.83511	0.121672	-1.94728	0.548797	-1.09528	-5.01008
Cnl1_413	0.831833	10.0594	8.29751	2.22835	0.243343	-3.31831	0.277789	-1.8967	-5.09161
Cnl1_412	0.369704	2.29424	1.73245	0.393238	0.730029	-2.22837	0.405206	-2.13934	-1.24678
Cnl1_411	0.277278	0.97064	1.003	0.131079	0.121672	-1.85491	-0.0473059	-2.9358	-3.04325
TCN1-I_680	0	0.08824	0.455907	0	0	0	-2.36923	0	0
Cnl1_410	3521.89	6.00032	2.73544	115.481	1767.52	10.3304	1.13327	5.39973	9.33574
TCN10-LTR_499	0.277278	0.17648	0	0	0	0	0	0	0
TCN10-LTR_498	0.277278	0.61768	0.911814	0.655396	0.486686	-1.71741	-0.561879	-0.476373	-0.905747
TCN2-LTR_689	0.46213	0.26472	0.63827	0	0.365015	-0.465869	-1.2697	0	-0.806212
TCN10-LTR_497	0	0	0.182363	0	0	0	0	0	0
TCN10-LTR_496	0.831833	0.70592	0	0.262158	0.121672	0	0	0	0
TCN10-LTR_495	0.184852	3.0884	0.364726	0	0	-0.980442	3.08198	0	0
TCN10-LTR_494	0.0924259	0.17648	0	0	0	0	0	0	0
MuDRF-3_MLP_486	0	5.02968	4.28553	0.786475	0	0	0.230995	-2.446	0
TCN1-LTR_880	0.0924259	0.4412	0.0911814	0.131079	0	0.019558	2.27462	0.523627	0
hAT-9_PGr_1311	0.0924259	0.08824	0	0.131079	0	0	0	0	0
hAT-9_PGr_1310	0	0.08824	0	0.131079	0	0	0	0	0
Cnl1_409	0.184852	4.32376	4.19434	0.655396	2.06842	-4.504	0.043842	-2.67801	-1.01992
Cnl1_408	0.0924259	4.05904	2.37072	0.786475	2.19009	-4.68088	0.775816	-1.59185	-0.114334
Cnl1_407	10.8138	51.5322	1.73245	1.04863	15.939	2.642	4.89459	-0.7243	3.20168
Cnl1_406	17.3761	1434.61	0	33283.8	127484	0	0	0	0
Cnl1_405	18.7625	1112.8	0	31064.2	129488	0	0	0	0
Cnl1_404	18.0231	1096.38	0	30013.6	120440	0	0	0	0
Cnl1_403	4.15917	794.513	0	8855.71	64805.3	0	0	0	0
Cnl1_402	0	0	0	0	0	0	0	0	0
Cnl1_401	0.0924259	0	0.273544	0	0.121672	-1.5654	0	0	-1.16878
Cnl1_400	0.184852	0.52944	0.63827	0.524317	0	-1.7878	-0.269698	-0.283728	0
TCN1-LTR_879	0.554555	0.8824	0	0	0	0	0	0	0
TCN1-LTR_878	0.0924259	0.08824	0.273544	0	0.121672	-1.5654	-1.63227	0	-1.16878
TCN1-LTR_877	0	0	0	0	0	0	0	0	0
TCN1-LTR_876	0	0.17648	0.0911814	0.131079	0	0	0.952694	0.523627	0
TCN1-LTR_875	0	0.4412	0.455907	0	0.243343	0	-0.0473059	0	-0.905747
TCN1-LTR_874	0	0.08824	0	0	0	0	0	0	0
TCN1-LTR_873	0	0	0	0	0	0	0	0	0
TCN1-LTR_510	0.277278	0.26472	0.364726	0.131079	0	-0.395479	-0.462343	-1.47637	0
TCA5_I-int_867	0	0.08824	0.182363	0	0	0	-1.04731	0	0
TCN1-LTR_509	0	0.08824	0.273544	0.262158	0	0	-1.63227	-0.0613352	0
TCN1-LTR_508	0	0.35296	0.182363	0.262158	0	0	0.952694	0.523627	0
TCN1-LTR_507	0	0	0	0	0	0	0	0	0
TCN1-LTR_506	0	0.52944	0.182363	0	0.486686	0	1.53766	0	1.41618
TCN1-LTR_505	0.369704	1.3236	0.729451	0	0.365015	-0.980442	0.859585	0	-0.998857
Mariner-2_SLL_180	0	0	0	0	0	0	0	0	0
TCN1-LTR_504	0.831833	8.3828	5.74443	0	2.92012	-2.7878	0.54527	0	-0.976137
TCN1-LTR_503	0.184852	1.41184	1.18536	0	0.486686	-2.68088	0.252254	0	-1.28426
TCN1-LTR_502	0	0.17648	0.0911814	0.131079	0	0	0.952694	0.523627	0
TCN1-LTR_501	0.46213	0.35296	0.0911814	0.262158	0.121672	2.34149	1.95269	1.52363	0.416181
TCN4-I_709	0	0.17648	0.273544	0.131079	0	0	-0.632268	-1.06134	0
TCN4-I_708	0	0.97064	1.18536	0.131079	1.21672	0	-0.288314	-3.17681	0.0376691
HARBINGER1_CN_1236	0	0	0.0911814	0	0.243343	0	0	0	1.41618
HARBINGER1_CN_1235	0.0924259	0	0.182363	0	0	-0.980442	0	0	0
HARBINGER1_CN_1234	0	0.17648	0.273544	0	0.121672	0	-0.632268	0	-1.16878
Cnl1_748	6.00768	19.7658	0.547088	0.393238	34.433	3.45696	5.17509	-0.476373	5.97588
Cnl1_747	10.9987	51.6204	1.82363	1.57295	15.8173	2.59245	4.82306	-0.213338	3.11662
Cnl1_746	0.46213	2.02952	2.18835	0.262158	0.973372	-2.24348	-0.108706	-3.06134	-1.16878
Cnl1_745	0.277278	1.41184	2.27953	2.09727	0.608358	-3.03934	-0.691162	-0.120229	-1.90575
Cnl1_744	0.646981	2.47072	2.00599	0.786475	1.21672	-1.63252	0.300617	-1.35084	-0.721323
Mariner-2_SLL_179	0	0	0	0	0	0	0	0	0
Cnl1_743	0.184852	0.97064	0.364726	0.131079	1.09504	-0.980442	1.41213	-1.47637	1.58611
Cnl1_742	0.831833	2.38248	1.4589	0	1.46006	-0.810517	0.707582	0	0.0011432
Cnl1_741	0.369704	1.85304	1.09418	1.17971	0.365015	-1.5654	0.760049	0.10859	-1.58382
Cnl1_1133	1.20154	3.00016	3.37371	2.62158	2.19009	-1.48946	-0.169296	-0.363898	-0.623348
Cnl1_740	0.0924259	1.85304	2.82662	0.393238	2.43343	-4.93464	-0.609185	-2.84561	-0.216088
Cnl1_1132	0.277278	0.52944	0.273544	0.262158	0.121672	0.019558	0.952694	-0.0613352	-1.16878
Cnl1_1131	62.2951	417.728	419.526	240.661	0.973372	-2.75157	-0.00619363	-0.801754	-8.75155
Cnl1_1130	30.0384	30.5311	20.607	77.0746	0.851701	0.543675	0.567143	1.90312	-4.59664
TCN5-LTR_1100	0	0	0.182363	0	0.121672	0	0	0	-0.583819
TCN3-LTR_899	0.0924259	0	0	0	0	0	0	0	0
TCN3-LTR_898	0	0.08824	0	0	0	0	0	0	0
TCN1-I_70	29.0217	0	0	0.131079	0	0	0	0	0
Helitron-1_SLL_161	0	0.26472	0.455907	0.262158	0	0	-0.784271	-0.798301	0
TCN2-I_995	0.46213	0.79416	1.003	0.786475	0.121672	-1.11795	-0.336812	-0.350842	-3.04325
LTR11_CN_1062	0	0.17648	0	0	0	0	0	0	0
TCN2-I_994	0.0924259	0.70592	1.003	0.262158	0	-3.43987	-0.506737	-1.9358	0
LTR11_CN_1061	0	0.17648	0	0	0	0	0	0	0
TCN2-I_993	0	0.17648	0	0	0	0	0	0	0
Cnl1_739	11.7381	582.208	1.09418	15432.6	41056.2	3.42328	9.05554	13.7838	15.1955
LTR11_CN_1060	0	0	0	0	0	0	0	0	0
TCN2-I_992	0	0	0	0	0	0	0	0	0
Cnl1_738	18.4852	1542.17	0	41937.5	203126	0	0	0	0
TCN2-I_991	1.10911	0.8824	1.36772	0.917554	0.121672	-0.30237	-0.632268	-0.575908	-3.49071
Cnl1_737	19.2246	1351.66	0	34717.5	160468	0	0	0	0
Cnl1_1129	0.46213	10.4123	4.55907	0.131079	0.973372	-3.30237	1.19148	-5.12023	-2.22768
TCN2-I_990	0.924259	2.11776	1.64126	1.57295	0.243343	-0.828439	0.367732	-0.0613352	-2.75374
Cnl1_736	18.4852	1320.69	0	33833	171505	0	0	0	0
Cnl1_1128	0.277278	0.79416	0.0911814	0	0.243343	1.60452	3.12262	0	1.41618
Cnl1_735	0.46213	1.58832	1.55008	1.96619	0.608358	-1.74598	0.0351563	0.343055	-1.34935
Cnl1_1127	0.0924259	1.58832	2.4619	0.524317	2.06842	-4.73533	-0.632268	-2.23126	-0.251244
Cnl1_734	0	0.17648	0.182363	0	0	0	-0.0473059	0	0
Cnl1_1126	0.277278	4.8532	2.64426	2.09727	0.973372	-3.25346	0.876073	-0.334354	-1.4418
Cnl1_733	0	0	0	0	0	0	0	0	0
Cnl1_1125	5.73041	536.499	1.09418	10169.5	29207.6	2.38879	8.93759	13.1821	14.7042
Cnl1_732	0	0	0.364726	0	0.121672	0	0	0	-1.58382
Cnl1_1124	18.3928	1496.82	0	38354.3	215236	0	0	0	0
Cnl1_731	0.0924259	0.35296	0.0911814	0	0	0.019558	1.95269	0	0
Cnl1_1123	19.2246	1349.19	0	34900.1	182278	0	0	0	0
Cnl1_730	0.0924259	0.52944	0.273544	0.393238	0.121672	-1.5654	0.952694	0.523627	-1.16878
Cnl1_1122	18.4852	1323.51	0	33856.7	172309	0	0	0	0
LSU-rRNA_Sce_174	0	0.17648	0.0911814	0	0	0	0.952694	0	0
Cnl1_1121	0.0924259	0.70592	0.273544	0	0.121672	-1.5654	1.36773	0	-1.16878
LSU-rRNA_Sce_173	0.0924259	0.08824	0.0911814	0	0	0.019558	-0.0473059	0	0
Cnl1_1120	3.97431	8.91224	0.364726	11.666	0	3.44582	4.61091	4.99936	0
LSU-rRNA_Sce_172	0	0.08824	0.0911814	0.131079	0	0	-0.0473059	0.523627	0
LSU-rRNA_Sce_171	228.107	8.02984	0.455907	22.1524	0.973372	8.96676	4.13856	5.60258	1.09425
LSU-rRNA_Sce_170	98.3412	923.256	42.217	0.786475	462.474	1.21997	4.45083	-5.74628	3.45348
LTR12_CN_983	0	0	0	0	0	0	0	0	0
LTR12_CN_982	0	0.17648	0	0.131079	0	0	0	0	0
TCN3-I_616	2.21822	1.7648	2.64426	1.44187	1.46006	-0.25346	-0.583359	-0.874922	-0.856838
TCN3-I_615	0	0.26472	0.182363	0	0	0	0.537657	0	0
LTR11_CN_1059	0.646981	1.23536	1.64126	0	2.06842	-1.34301	-0.409876	0	0.333719
TCN3-I_614	0	0.35296	0.455907	0	0.243343	0	-0.369234	0	-0.905747
LTR11_CN_1058	0.739407	0.97064	1.82363	0	2.67677	-1.30237	-0.909802	0	0.553684
TCN3-I_613	7.02437	5.02968	5.56206	0	31.9996	0.336748	-0.145153	0	2.52436
LTR11_CN_1057	0	0	0	0.131079	0	0	0	0	0
TCN2-I_989	0.831833	2.206	1.82363	0.131079	2.67677	-1.13245	0.274622	-3.7983	0.553684
TCN3-LTR_520	0.184852	0.4412	0.364726	0	0.121672	-0.980442	0.274622	0	-1.58382
Cnl1_729	0.184852	1.41184	0.0911814	0.131079	0.365015	1.01956	3.95269	0.523627	2.00114
Cnl1_728	0.184852	0.97064	1.27654	0	0.486686	-2.7878	-0.395229	0	-1.39117
Cnl1_727	1.84852	1.50008	0.364726	0	0.121672	2.34149	2.04016	0	-1.58382
Cnl1_1119	0.0924259	2.206	0.182363	0	0	-0.980442	3.59655	0	0
Cnl1_726	15.5276	891.313	0.0911814	25522.3	96903.1	7.41188	13.2549	18.0946	20.0194
Cnl1_1118	0	1.23536	2.18835	0	1.46006	0	-0.824913	0	-0.583819
Cnl1_725	0	0	0.0911814	0	0	0	0	0	0
Cnl1_1117	0	0.17648	0.182363	0	0	0	-0.0473059	0	0
Cnl1_724	0	59.562	0	14.2876	98.7973	0	0	0	0
LSU-rRNA_Sce_169	1.47881	2.38248	2.09717	1.17971	0.608358	-0.504004	0.18402	-0.83001	-1.78545
Cnl1_1116	0.184852	1.14712	0.911814	0.131079	0.121672	-2.30237	0.331206	-2.7983	-2.90575
Cnl1_723	0	0.08824	0.273544	0	0	0	-1.63227	0	0
LSU-rRNA_Sce_168	0.369704	5.2944	4.46789	0.655396	2.19009	-3.59515	0.244875	-2.76915	-1.0286
Cnl1_1115	0.646981	3.0884	2.27953	1.44187	0.121672	-1.81694	0.438121	-0.660797	-4.22768
Cnl1_722	0	54.8853	0	12.5836	200.15	0	0	0	0
LSU-rRNA_Sce_167	2.31065	5.7356	3.82962	3.93238	0.121672	-0.728903	0.582745	0.0382005	-4.97614
Cnl1_1114	0.277278	0.97064	1.18536	0	0.608358	-2.09592	-0.288314	0	-0.962331
Cnl1_721	0	0.26472	0.0911814	0	0.121672	0	1.53766	0	0.416181
LSU-rRNA_Sce_166	0.831833	1.23536	2.64426	1.44187	0	-1.6685	-1.09793	-0.874922	0
Cnl1_1113	0.0924259	1.58832	1.55008	0.655396	0.121672	-4.0679	0.0351563	-1.24191	-3.67128
Cnl1_720	0	0	0	0	0	0	0	0	0
LSU-rRNA_Sce_165	40.4825	1.41184	0.911814	0.524317	0.486686	5.47242	0.630766	-0.798301	-0.905747
Cnl1_1112	15.5276	901.019	0.0911814	25914.5	104106	7.41188	13.2705	18.1166	20.1228
LSU-rRNA_Sce_164	0.739407	1.85304	1.36772	1.70403	0.730029	-0.887333	0.438121	0.317176	-0.905747
Cnl1_1111	0	0.08824	0	0	0.243343	0	0	0	0
LSU-rRNA_Sce_163	1.38639	1.58832	0.729451	0.917554	4.98853	0.926449	1.12262	0.330982	2.77373
Cnl1_1110	0.0924259	0	0.182363	0	0.121672	-0.980442	0	0	-0.583819
LSU-rRNA_Sce_162	0.831833	5.2944	2.55308	0.131079	2.19009	-1.61787	1.05223	-4.28373	-0.221249
TCN2-LTR_999	0.0924259	0.35296	0.455907	0.262158	0	-2.30237	-0.369234	-0.798301	0
TCN2-LTR_998	0.831833	1.05888	1.09418	1.04863	1.21672	-0.395479	-0.0473059	-0.0613352	0.153146
TCN2-LTR_997	0	0.35296	0.455907	0.524317	0	0	-0.369234	0.201699	0
TCN2-LTR_1085	0	0.08824	0.0911814	0	0	0	-0.0473059	0	0
TCN2-LTR_996	0	0	0.273544	0.131079	0.365015	0	0	-1.06134	0.416181
TCN3-LTR_519	0.0924259	0.61768	0.0911814	0.262158	0.121672	0.019558	2.76005	1.52363	0.416181
TCN3-LTR_518	0	0.61768	0.273544	0.262158	0	0	1.17509	-0.0613352	0
TCN5-LTR_111	0	0	0	0	0	0	0	0	0
TCN5-LTR_110	1.38639	0.08824	0	0.131079	0	0	0	0	0
Cnl1_719	0.0924259	0.17648	0.182363	0	0	-0.980442	-0.0473059	0	0
Cnl1_718	0.0924259	0.26472	0.364726	0.131079	0	-1.98044	-0.462343	-1.47637	0
Cnl1_717	0	0.61768	0.273544	0.393238	0	0	1.17509	0.523627	0
Cnl1_1109	0	0	0	0	0	0	0	0	0
Cnl1_716	0	53.8264	0	12.5836	177.762	0	0	0	0
Cnl1_1108	1.10911	134.213	0	4139.22	9571.66	0	0	0	0
Cnl1_715	0	0.79416	0.273544	0	0.365015	0	1.53766	0	0.416181
Cnl1_1107	0	54.4441	0	14.0255	54.8739	0	0	0	0
Cnl1_1106	0	62.3857	0	16.3849	52.5621	0	0	0	0
Cnl1_1105	0	0.26472	0.182363	0	0.243343	0	0.537657	0	0.416181
Cnl1_1104	0.0924259	0.17648	0.364726	0	0.121672	-1.98044	-1.04731	0	-1.58382
Cnl1_1103	0	61.1503	0	16.9092	56.9423	0	0	0	0
TCN2-I_608	0	0.17648	0	0.131079	0	0	0	0	0
TCN2-I_607	0	0.17648	0.364726	0.131079	0	0	-1.04731	-1.47637	0
TCN2-I_606	4.991	16.0597	4.55907	4.98101	4.50185	0.130589	1.81663	0.127699	-0.0182221
LTR11_CN_178	0	0.26472	0.364726	0	0	0	-0.462343	0	0
LTR11_CN_177	0	0.26472	0.547088	0	0.243343	0	-1.04731	0	-1.16878
LTR11_CN_176	1.57124	8.64752	7.47687	0.131079	4.2585	-2.25053	0.209852	-5.83392	-0.812088
LTR11_CN_175	0	0	0	0	0	0	0	0	0
Harbinger-7_PGr_159	0	0	0	0	0	0	0	0	0
Gypsy-14_ADe-I_156	0	0.26472	0	0	0.243343	0	0	0	0
TCN2-LTR_612	0.184852	0	0	0	0	0	0	0	0
TCN2-LTR_611	0.184852	0.26472	0.273544	0	0.121672	-0.565404	-0.0473059	0	-1.16878
TCN2-LTR_610	0.0924259	0.35296	0.547088	0	0.121672	-2.5654	-0.632268	0	-2.16878
TCN760_1017	0.0924259	0.08824	0.729451	0	0	-2.98044	-3.04731	0	0
TCN760_1016	0	0	0	0	0	0	0	0	0
TCN760_1015	0	0	0.0911814	0	0	0	0	0	0
TCN760_1014	0.0924259	0.08824	0	0	0	0	0	0	0
TCN2-LTR_609	0	0.08824	0.273544	0	0.243343	0	-1.63227	0	-0.168782
Copia-55_MLP-I_274	0	0.08824	0	0	0	0	0	0	0
TCN6-LTR_247	0	0.61768	0.0911814	0	0	0	2.76005	0	0
TCN6-LTR_246	0	0	0	0	0	0	0	0	0
TCN6-LTR_245	0	0	0	0	0	0	0	0	0
TCN6-LTR_244	0	0.08824	0.0911814	0	0	0	-0.0473059	0	0
TCN6-LTR_243	0	0.08824	0.273544	0	0	0	-1.63227	0	0
PIF_Harbinger-1_TreMes_493	0	0.08824	0	0	0	0	0	0	0
FoHeli2_1_1307	0	0	0.0911814	0	0	0	0	0	0
TCN10-LTR_757	0	0	0	0	0	0	0	0	0
TCN1-LTR_1327	0	0.52944	0.0911814	0.131079	0	0	2.53766	0.523627	0
Ginger2-1_MG_1232	0	0.08824	0	0	0	0	0	0	0
TCN1-LTR_1326	0	0	0.0911814	0	0.121672	0	0	0	0.416181
TCN1-LTR_1325	0.554555	2.91192	1.64126	1.04863	0.243343	-1.5654	0.827163	-0.646298	-2.75374
TCN1-LTR_1324	0.369704	0.8824	0.273544	0	0.973372	0.434596	1.68966	0	1.83122
TCN1-LTR_1323	0	0	0.273544	0	0.121672	0	0	0	-1.16878
TCN1-I_1078	0	0.08824	0	0	0.243343	0	0	0	0
TCN1-I_1077	0	0.08824	0.0911814	0	0	0	-0.0473059	0	0
TCN1-I_1076	0	0	0.0911814	0	0	0	0	0	0
TCN1-I_1075	0.277278	1.7648	2.4619	1.57295	0	-3.15037	-0.480265	-0.646298	0
TCN760_250	0	0.08824	0.0911814	0.524317	0.121672	0	-0.0473059	2.52363	0.416181
TCN4-LTR_625	0.277278	0.17648	0	0	0	0	0	0	0
TCN1-I_1074	0.184852	0.08824	0.182363	0	0	0.019558	-1.04731	0	0
TCN4-LTR_624	0.0924259	0.08824	0	0	0.608358	0	0	0	0
TCN1-I_1073	0.0924259	0.17648	0.182363	0.131079	0.121672	-0.980442	-0.0473059	-0.476373	-0.583819
TCN4-LTR_623	0.0924259	0.97064	1.09418	0	1.33839	-3.5654	-0.172837	0	0.29065
HARBINGER1_CN_467	10.0744	69.5332	67.5654	1.83511	40.5166	-2.74559	0.0414162	-5.20235	-0.737771
TCN760_249	0.0924259	0	0	0.131079	0.365015	0	0	0	0
TCN760_248	0	0	0	0	0	0	0	0	0
TCN3-LTR_1091	0	0.08824	0.455907	1.31079	0	0	-2.36923	1.52363	0
TCN3-LTR_1090	0	0.17648	0.182363	0	0	0	-0.0473059	0	0
TCN4-LTR_99	0	0.08824	0	0	0.121672	0	0	0	0
LTR11_CN_483	0	0.17648	0	0	0	0	0	0	0
LTR11_CN_482	0	0	0.0911814	0	0	0	0	0	0
LTR11_CN_481	0	0	0	0	0	0	0	0	0
LTR11_CN_480	0	0.17648	0.0911814	0	0	0	0.952694	0	0
DNA6-2_MLP_669	0	0.26472	0.364726	0.131079	0	0	-0.462343	-1.47637	0
TCN3-LTR_1089	0	0	0	0	0	0	0	0	0
TCN3-LTR_1088	0	0	0.273544	0	0	0	0	0	0
Helitron-1_AN_751	0	0.08824	0.0911814	0	0	0	-0.0473059	0	0
TCN3-LTR_1087	0	0	0.0911814	0	0	0	0	0	0
LTR11_CN_479	0	0	0	0	0	0	0	0	0
LTR11_CN_478	0.46213	1.05888	0.547088	0	1.09504	-0.243476	0.952694	0	1.00114
LTR11_CN_477	0.0924259	0.08824	0	0.131079	0	0	0	0	0
LTR11_CN_476	0	0.17648	0	0	0	0	0	0	0
LTR11_CN_475	0	0	0	0	0	0	0	0	0
LTR11_CN_474	0	0.08824	0	0	0.121672	0	0	0	0
LTR11_CN_473	4.80615	0	0	0	0	0	0	0	0
LTR11_CN_472	0	0.17648	0.0911814	0	0	0	0.952694	0	0
Copia-7_ADe-I_668	0.184852	0.4412	0.273544	0	0	-0.565404	0.68966	0	0
LTR11_CN_471	1.20154	0.4412	1.27654	0	0.243343	-0.0873572	-1.53273	0	-2.39117
Copia-7_ADe-I_667	0.0924259	1.14712	1.09418	0.131079	0.243343	-3.5654	0.0681713	-3.06134	-2.16878
LTR11_CN_470	0.0924259	0	0.0911814	0	0	0.019558	0	0	0
TCN2-LTR_1000	0.184852	0.79416	0.63827	0.393238	0	-1.7878	0.315264	-0.698765	0
LTR11_CN_469	0	0.17648	0.182363	0.131079	0	0	-0.0473059	-0.476373	0
TCN5-I_1278	0	0.26472	0.273544	0.131079	0.608358	0	-0.0473059	-1.06134	1.15315
TCN5-I_1277	0.0924259	0.26472	0.0911814	0	0.121672	0.019558	1.53766	0	0.416181
TCN5-I_1276	1.20154	2.11776	2.27953	1.44187	0.486686	-0.923858	-0.1062	-0.660797	-2.22768
LTR11_CN_1316	0.184852	0.35296	0.273544	0.262158	0	-0.565404	0.367732	-0.0613352	0
LTR11_CN_1315	0.0924259	0.35296	0	0.131079	0	0	0	0	0
LTR11_CN_1314	0	0.08824	0.273544	0	0.121672	0	-1.63227	0	-1.16878
LTR11_CN_1313	0	0.08824	0.0911814	0	0	0	-0.0473059	0	0
LTR11_CN_1312	0	0	0	0	0	0	0	0	0
EnSpm-2_ROr_1052	0	0	0	0	0	0	0	0	0
REP-2_PSt_1071	0	0.08824	0	0	0	0	0	0	0
TCN2-LTR_1334	0.0924259	0	0.182363	0.131079	0	-0.980442	0	-0.476373	0
TCN2-LTR_1333	0	0	0.182363	0	0	0	0	0	0
TCN2-LTR_1332	0.0924259	0.08824	0.0911814	0	0	0.019558	-0.0473059	0	0
TCN6-I_116	0	0	0	0	0.121672	0	0	0	0
TCN6-I_115	0.184852	0.26472	0.182363	0.393238	0.243343	0.019558	0.537657	1.10859	0.416181
TCN6-I_114	0.0924259	0.08824	0.0911814	0.131079	0	0.019558	-0.0473059	0.523627	0
TCN6-I_113	2751.33	1.3236	2.09717	3.8013	4.86686	10.3575	-0.663977	0.858046	1.21455
TCN6-I_112	16.7291	0.52944	0.455907	0.524317	0	5.19748	0.215729	0.201699	0
TCN3-I_1262	0.184852	1.3236	1.36772	0.131079	0.243343	-2.88733	-0.0473059	-3.38326	-2.49071
TCN3-I_1261	0.369704	1.3236	1.4589	0.917554	1.21672	-1.98044	-0.140415	-0.669018	-0.261891
TCN3-I_1260	0.184852	1.41184	1.27654	1.70403	0	-2.7878	0.145339	0.416712	0
TCN760_540	0	0	0	0	0	0	0	0	0
TCN5-LTR_713	0.184852	0.08824	0.0911814	0	0	1.01956	-0.0473059	0	0
TCN5-LTR_712	0.184852	0.08824	0	0	0	0	0	0	0
TCN5-LTR_711	0	0.08824	0.273544	0	0.121672	0	-1.63227	0	-1.16878
TCN3-I_1259	0.0924259	0.17648	0	0	0	0	0	0	0
TCN1-LTR_199	0	0.08824	0	0	0	0	0	0	0
TCN4-LTR_1099	0	0.17648	0	0	0	0	0	0	0
TCN1-LTR_198	0	0	0	0.131079	0	0	0	0	0
TCN4-LTR_1098	0.277278	0.26472	1.18536	0	0.365015	-2.09592	-2.16278	0	-1.6993
Harbinger-4_PSt_588	0	0	0.182363	0.393238	0.730029	0	0	1.10859	2.00114
LSU-rRNA_Sce_752	0	0	0	0	0	0	0	0	0
TCN5-I_389	0.0924259	0.17648	0	0.786475	0.121672	0	0	0	0
TCN760_539	0	0.26472	0.182363	0.131079	0	0	0.537657	-0.476373	0
TCN5-I_388	0	0.17648	0	0	0	0	0	0	0
TCN3-I_85	829.153	0	0.273544	0	0	11.5656	0	0	0
TCN760_538	0	0	0	0	0.365015	0	0	0	0
TCN5-I_387	0.831833	3.0884	2.4619	9.4377	3.04179	-1.5654	0.32709	1.93866	0.305149
TCN3-I_84	58.2283	0.08824	0.0911814	0	0	9.31877	-0.0473059	0	0
TCN760_537	0.0924259	0.17648	0.0911814	0	0.121672	0.019558	0.952694	0	0.416181
TCN3-I_83	912.798	4.8532	0.455907	0.262158	2.67677	10.9673	3.41213	-0.798301	2.55368
TCN760_536	0	0	0	0	0	0	0	0	0
TCN3-I_82	579.326	4.14728	0.0911814	0.262158	0.973372	12.6333	5.50728	1.52363	3.41618
TCN760_535	0	0.08824	0.0911814	0	0	0	-0.0473059	0	0
TCN3-I_81	504.738	0.17648	0.63827	0	0	9.62715	-1.85466	0	0
TCN760_534	0	0.08824	0	0	0	0	0	0	0
TCN3-I_80	2143.45	0.35296	0.63827	0.262158	0.608358	11.7135	-0.854661	-1.28373	-0.0692461
TCN760_533	0	0.08824	0.0911814	0	0	0	-0.0473059	0	0
TCN4-LTR_909	0	0.4412	0.0911814	0	0	0	2.27462	0	0
TCN760_532	0	0.08824	0	0	0	0	0	0	0
TCN4-LTR_908	0.369704	0.26472	0.273544	0.393238	0	0.434596	-0.0473059	0.523627	0
TCN760_531	0	0.17648	0	0	0	0	0	0	0
TCN760_530	0	0	0	0	0	0	0	0	0
TCN3-I_79	1248.95	2.47072	1.36772	2.4905	3.28513	9.83473	0.853158	0.864664	1.26418
TCN760_529	0.184852	0.17648	0	0	0.365015	0	0	0	0
TCN760_528	0.184852	0	0.273544	0.131079	0	-0.565404	0	-1.06134	0
TCN4-I_386	0.0924259	0.52944	0.729451	0.393238	0.243343	-2.98044	-0.462343	-0.89141	-1.58382
TCN4-I_385	0.369704	1.14712	1.27654	0.524317	0.973372	-1.7878	-0.154221	-1.28373	-0.391174
TCN4-I_384	0.0924259	0	0	0	0	0	0	0	0
TCN3-LTR_1007	0.0924259	0	0.0911814	0	0.243343	0.019558	0	0	1.41618
TCN3-LTR_1006	0.184852	0.08824	0	0	0.121672	0	0	0	0
TCN6-I_797	0.277278	0.35296	0.0911814	0.393238	0	1.60452	1.95269	2.10859	0
TCN6-I_796	0.0924259	0.26472	0.273544	0	0	-1.5654	-0.0473059	0	0
TCN6-I_795	0.277278	0.4412	0.182363	0	0.243343	0.604521	1.27462	0	0.416181
TCN6-I_794	0.184852	0.4412	0	0	0.121672	0	0	0	0
TCN6-I_793	0.277278	0.79416	0.273544	0.131079	0.121672	0.019558	1.53766	-1.06134	-1.16878
LTR11_CN_756	7.4865	163.774	8.20632	76.9435	0	-0.132445	4.31882	3.22899	0
LTR11_CN_755	0	0	0.182363	0	0	0	0	0	0
LTR11_CN_754	0.0924259	0.08824	0	0	0	0	0	0	0
LTR11_CN_753	0	0	0.0911814	0	0	0	0	0	0
TCN3-I_296	1.94094	4.8532	5.19734	2.75266	0.851701	-1.42101	-0.0988362	-0.916945	-2.60935
TCN3-I_295	1.29396	3.00016	2.73544	0.262158	3.28513	-1.07998	0.133266	-3.38326	0.264178
TCN1-I_1322	0	0.17648	0	0.131079	0	0	0	0	0
TCN1-I_1321	2.68035	8.55928	2.09717	0.393238	9.00369	0.353977	2.02905	-2.41497	2.10207
Copia-14_BG-I_857	0.554555	0.8824	0.455907	0.262158	0.121672	0.282592	0.952694	-0.798301	-1.90575
TCN3-LTR_1348	0.184852	0.35296	0.273544	0	0.121672	-0.565404	0.367732	0	-1.16878
TCN3-LTR_1347	0.0924259	0.08824	0.182363	0	0	-0.980442	-1.04731	0	0
TCN3-LTR_1346	0	0	0.273544	0	0	0	0	0	0
TCN3-LTR_1345	0	0	0.0911814	0.131079	0	0	0	0.523627	0
TCN3-LTR_1344	0	0	0.182363	0	0	0	0	0	0
TCN3-LTR_1343	0.0924259	0	0	0	0.121672	0	0	0	0
TCN3-LTR_1342	0.277278	0.26472	0.729451	0.524317	0.243343	-1.39548	-1.46234	-0.476373	-1.58382
TCN3-LTR_1341	0	0.17648	0	0.131079	0	0	0	0	0
TCN2-I_292	0	0.08824	0	0	0	0	0	0	0
Cnl1_399	0	0.08824	0	0.131079	0	0	0	0	0
TCN2-I_291	0	0.61768	0	0.262158	0	0	0	0	0
Cnl1_398	0	0.26472	0.547088	0	0	0	-1.04731	0	0
Gypsy-20_PGr-I_348	0	0	0	0.262158	0	0	0	0	0
Gypsy-8_CPu-I_586	0	0	0	0	0	0	0	0	0
Copia-37_MLP-I_273	0	0	0.0911814	0	0	0	0	0	0
DIRS-2_PGr-I_975	0	0	0	0	0	0	0	0	0
LTR12_CN_275	0.0924259	0	0.0911814	0	0	0.019558	0	0	0
TCN2-LTR_294	0	0.26472	0.455907	0.393238	0	0	-0.784271	-0.213338	0
TCN2-LTR_293	0	0	0	0	0	0	0	0	0
TCN1-I_282	0	0.26472	0.0911814	0	0	0	1.53766	0	0
TCN1-I_281	0.0924259	0.4412	0.182363	0	0	-0.980442	1.27462	0	0
TCN4-I_1097	2.31065	1.3236	1.55008	0.917554	0.121672	0.575951	-0.227878	-0.756481	-3.67128
TCN4-I_1096	0	0	0	0	0	0	0	0	0
TCN4-I_1095	0.0924259	0.61768	0.911814	0.393238	0	-3.30237	-0.561879	-1.21334	0
TCN4-I_1094	30.9627	4.32376	4.10316	1.96619	0.973372	2.91572	0.0755509	-1.06134	-2.07567
TCN4-I_1093	0	0.79416	0.273544	0	0	0	1.53766	0	0
TCN4-I_1092	0.0924259	0.26472	0.0911814	0	0	0.019558	1.53766	0	0
TCN4-LTR_1009	0.184852	0.08824	0	0	0	0	0	0	0
TCN4-I_304	0	0	0	0	0	0	0	0	0
TCN760_800	0	0.08824	0	0	0	0	0	0	0
Zisupton-4_PGr_920	0	0	0	0	0	0	0	0	0
Cnl1_345	0.277278	0.61768	1.4589	0.655396	0.121672	-2.39548	-1.23995	-1.15444	-3.58382
Cnl1_344	0.184852	0.79416	0.455907	0.524317	0	-1.30237	0.800691	0.201699	0
Cnl1_343	30.6854	2.47072	2.00599	1.17971	0.486686	3.93517	0.300617	-0.765879	-2.04325
Cnl1_342	1.10911	4.76496	1.64126	1.17971	3.52848	-0.565404	1.53766	-0.476373	1.10424
Cnl1_341	0.184852	1.05888	1.73245	0.655396	0.365015	-3.22837	-0.710271	-1.40237	-2.24678
Cnl1_340	0.554555	1.58832	1.73245	0.524317	3.04179	-1.64341	-0.125308	-1.7243	0.812109
TCN4-LTR_1356	0	0	0.182363	0	0	0	0	0	0
TCN4-LTR_1355	0	0.26472	0	0	0.121672	0	0	0	0
TCN4-LTR_1354	0.0924259	0.26472	0	0	0.121672	0	0	0	0
TCN4-LTR_1353	0.184852	0.8824	0.729451	0.262158	0.243343	-1.98044	0.274622	-1.47637	-1.58382
TCN4-LTR_1352	0.277278	3.00016	0.547088	0.393238	0	-0.980442	2.45519	-0.476373	0
Zisupton-4_PGr_919	0	0	0.0911814	0	0	0	0	0	0
Cnl1_339	1.20154	2.29424	1.003	0.393238	23.2393	0.260566	1.1937	-1.35084	4.53418
Cnl1_338	0.184852	4.8532	4.65025	0.786475	2.19009	-4.65287	0.0616285	-2.56384	-1.08632
Cnl1_337	0.0924259	2.02952	2.18835	1.44187	0.121672	-4.5654	-0.108706	-0.601904	-4.16878
Cnl1_336	17.8382	741.216	0.729451	21429.9	63463.4	4.61202	9.98887	14.8425	16.4088
Cnl1_335	17.7458	1237.04	0	34462.5	173187	0	0	0	0
Cnl1_334	16.7291	1136.53	0	20716.7	99305	0	0	0	0
Cnl1_333	14.7881	988.288	0	19810.7	104939	0	0	0	0
Cnl1_332	0	2.38248	2.82662	0.524317	2.19009	0	-0.246615	-2.43057	-0.368091
Cnl1_331	0.369704	1.14712	0.182363	0.131079	0.973372	1.01956	2.65313	-0.476373	2.41618
Cnl1_330	0.646981	0.61768	0.455907	1.44187	0	0.504985	0.438121	1.66113	0
PIF_Harbinger-1_CryNeo_1070	0.46213	0.26472	0.547088	0	0.365015	-0.243476	-1.04731	0	-0.583819
Gypsy-9_MLP-I_749	0	0	0	0	0	0	0	0	0
MuDR-3_PGr_595	0	0.08824	0.0911814	0	0	0	-0.0473059	0	0
TCN3-I_219	0.831833	6.08856	2.55308	2.35943	1.33839	-1.61787	1.25386	-0.113803	-0.931743
TCN3-I_218	1.57124	2.73544	3.00899	1.31079	0.608358	-0.937373	-0.137504	-1.19884	-2.30629
TCN3-I_217	5.91526	1.58832	0.63827	0.262158	0.243343	3.2122	1.31526	-1.28373	-1.39117
TCN3-I_216	0	0	0.455907	0	0.121672	0	0	0	-1.90575
Sagan-5_TMe_1139	0	0.08824	0	0	0	0	0	0	0
Cnl1_329	0.0924259	0.08824	0	0.131079	0.365015	0	0	0	0
Cnl1_328	0	0.26472	0.273544	0.131079	0.243343	0	-0.0473059	-1.06134	-0.168782
Cnl1_327	0.184852	0.4412	0.273544	0.131079	0.243343	-0.565404	0.68966	-1.06134	-0.168782
Cnl1_326	0.0924259	2.11776	1.003	10.3553	0.121672	-3.43987	1.07823	3.36798	-3.04325
Cnl1_325	0.277278	0.26472	0.273544	1.31079	0.243343	0.019558	-0.0473059	2.26059	-0.168782
Cnl1_324	3521.89	3.79432	1.36772	111.679	1767.4	11.3304	1.47207	6.35145	10.3356
Cnl1_323	10.8138	51.091	1.4589	1.17971	15.8173	2.88992	5.13011	-0.306448	3.43855
Cnl1_322	0	0.08824	0.455907	0	0.365015	0	-2.36923	0	-0.320785
Cnl1_321	18.9473	1117.21	0	34247.3	134703	0	0	0	0
Cnl1_320	0	0.08824	0.0911814	0	0	0	-0.0473059	0	0
Cnl1_319	0	39.4433	0	4.98101	5.96191	0	0	0	0
Cnl1_318	2.8652	3.61784	5.74443	5.37425	0.851701	-1.00353	-0.667034	-0.0961006	-2.75374
Cnl1_317	0.46213	0.97064	0.911814	0	0.243343	-0.980442	0.0901976	0	-1.90575
Cnl1_316	0.46213	104.741	0	3032.12	29867.4	0	0	0	0
Cnl1_315	0.184852	48.1791	0	1065.94	18292.3	0	0	0	0
TCN2-I_1149	0.0924259	0	0	0.524317	0.121672	0	0	0	0
Cnl1_314	0	0.17648	0.820632	0	0.486686	0	-2.21723	0	-0.753744
TCN2-I_1148	0	0	0	0	0	0	0	0	0
Cnl1_313	0.369704	64.9447	0	1627.74	22849.6	0	0	0	0
Cnl1_312	0.184852	0	0.547088	0	0	-1.5654	0	0	0
Cnl1_311	0.184852	0.17648	0.63827	0	0.365015	-1.7878	-1.85466	0	-0.806212
Cnl1_310	0	0.35296	0.273544	0	0	0	0.367732	0	0
TCN6-I_1013	0	0	0	0	0	0	0	0	0
TCN6-I_1012	0.184852	0.4412	0.547088	0	0	-1.5654	-0.31034	0	0
Cnl1_309	0.0924259	0	0	0	0	0	0	0	0
Cnl1_308	0.0924259	1.05888	1.4589	0.655396	0	-3.98044	-0.462343	-1.15444	0
TCN4-I_622	0	0	0	0	0	0	0	0	0
Cnl1_307	0	0.35296	0.0911814	0.131079	0	0	1.95269	0.523627	0
TCN4-I_621	0	0	0	0.131079	0	0	0	0	0
TCN4-I_620	1.29396	2.91192	3.55607	2.4905	1.46006	-1.45849	-0.288314	-0.513847	-1.28426
Cnl1_663	0.0924259	1.67656	0.729451	0.393238	0.121672	-2.98044	1.20062	-0.89141	-2.58382
Cnl1_662	38.4492	350.136	2.64426	1.04863	171.192	3.86202	7.04891	-1.33435	6.01661
Cnl1_661	0.369704	1.3236	2.37072	2.35943	0.608358	-2.68088	-0.840855	-0.00688744	-1.96233
Cnl1_660	0.739407	2.47072	2.09717	0.917554	1.33839	-1.504	0.236487	-1.19258	-0.64795
TCN2-LTR_215	0	0.79416	0.0911814	0	0	0	3.12262	0	0
TCN2-LTR_214	0	0.61768	0.0911814	0.393238	0	0	2.76005	2.10859	0
Gypsy-11_SCH-I_1054	0	0	0	0.131079	0	0	0	0	0
TCN4-I_619	1.38639	3.26488	2.73544	1.04863	3.65015	-0.980442	0.255257	-1.38326	0.416181
Cnl1_659	0.0924259	0.17648	0.182363	0	0	-0.980442	-0.0473059	0	0
Cnl1_658	0.0924259	0	0.0911814	0	0.121672	0.019558	0	0	0.416181
Cnl1_657	0	0.08824	0.182363	0.131079	0.121672	0	-1.04731	-0.476373	-0.583819
Cnl1_656	3.78946	180.98	0	5734.58	25055.3	0	0	0	0
Cnl1_655	9.33502	420.199	0	16390.1	73680.3	0	0	0	0
Cnl1_654	0	0	0.0911814	0	0	0	0	0	0
Cnl1_653	0.0924259	0.17648	0.273544	0	0	-1.5654	-0.632268	0	0
Cnl1_1045	1.20154	3.26488	0.182363	0	0	2.72	4.16215	0	0
Cnl1_652	0	0	0.0911814	0.131079	0	0	0	0.523627	0
Cnl1_1044	3.51218	2.02952	1.27654	14.4187	0.730029	1.46013	0.668901	3.49763	-0.806212
Cnl1_651	0.554555	592.002	0	2830.65	54042.1	0	0	0	0
Cnl1_1043	26.0641	27.7074	25.8955	94.2459	1.58173	0.00936227	0.0975677	1.86373	-4.03313
Cnl1_650	0.0924259	33.8842	0	868.924	10463	0	0	0	0
Cnl1_1042	0.46213	2.47072	1.73245	0.524317	0.608358	-1.90644	0.512122	-1.7243	-1.50982
Cnl1_1041	0.554555	2.82368	3.37371	1.04863	0.973372	-2.60493	-0.256759	-1.68583	-1.79327
TCN6-I_1358	0	0	0	0	0	0	0	0	0
Cnl1_1040	12.4775	52.2381	2.37072	3.67022	19.1024	2.39593	4.46171	0.630542	3.01036
TCN6-I_1357	0	0.26472	0.455907	0	0	0	-0.784271	0	0
TCN5-LTR_1011	0	0.52944	0.547088	0.131079	0.243343	0	-0.0473059	-2.06134	-1.16878
TCN1-LTR_764	0	0.17648	0	0.262158	0	0	0	0	0
TCN1-LTR_763	0.46213	0.35296	0	0	0	0	0	0	0
TCN1-LTR_762	0	0.17648	0	0	0	0	0	0	0
TCN1-LTR_761	0.0924259	0.26472	0	0.393238	0	0	0	0	0
TCN1-LTR_760	0.277278	2.206	0.364726	0.524317	0.608358	-0.395479	2.59655	0.523627	0.738109
TCN3-I_897	0	0.17648	0.364726	0	0.243343	0	-1.04731	0	-0.583819
TCN3-I_896	0	0.08824	0	0	0	0	0	0	0
TCN3-I_895	0.831833	1.85304	1.64126	1.17971	0.730029	-0.980442	0.175087	-0.476373	-1.16878
TCN3-I_894	0.831833	2.206	2.55308	1.44187	0.243343	-1.61787	-0.210805	-0.824296	-3.39117
Cnl1_649	5.91526	19.6775	0.455907	0.393238	34.433	3.69763	5.43167	-0.213338	6.23891
Cnl1_648	0.277278	2.206	2.18835	0.131079	0.851701	-2.98044	0.0115878	-4.06134	-1.36143
Cnl1_647	0.646981	904.372	0	7609.15	58803.6	0	0	0	0
Cnl1_1039	29.299	1589.29	0	50134.1	179477	0	0	0	0
Cnl1_646	4.15917	800.249	0	8977.22	68657.2	0	0	0	0
Cnl1_1038	18.3003	1266.51	0	29008	89931.3	0	0	0	0
Cnl1_645	0.46213	0.79416	1.36772	0.786475	0	-1.5654	-0.784271	-0.798301	0
Cnl1_1037	14.7881	990.671	0	19774.9	108561	0	0	0	0
Cnl1_644	0	0	0	0	0	0	0	0	0
Cnl1_1036	1.66367	0.17648	0.0911814	0	0	4.18948	0.952694	0	0
Cnl1_643	0.0924259	111.888	0	3793.17	15516.3	0	0	0	0
Cnl1_1035	3.97431	500.85	0	8761.73	23867.6	0	0	0	0
Cnl1_642	0	0	0.0911814	0	0	0	0	0	0
Cnl1_1034	0	0.26472	0.273544	0.131079	0.365015	0	-0.0473059	-1.06134	0.416181
Cnl1_641	0	0.08824	0	0	0	0	0	0	0
Cnl1_1033	0	0	0	0	0	0	0	0	0
Cnl1_1032	0.0924259	0.35296	0.455907	0	0.486686	-2.30237	-0.369234	0	0.0942526
Cnl1_1031	13.7715	528.734	0	23241.6	93431.8	0	0	0	0
Cnl1_1030	0	0.70592	1.36772	1.31079	0.121672	0	-0.954196	-0.0613352	-3.49071
TCN4-I_1008	0.369704	1.05888	0.820632	0.262158	0.121672	-1.15037	0.367732	-1.6463	-2.75374
TCN5-LTR_392	0	0.08824	0.0911814	0.131079	0	0	-0.0473059	0.523627	0
TCN5-LTR_391	0.184852	6.52976	0.0911814	0.262158	0.486686	1.01956	6.16215	1.52363	2.41618
TCN5-LTR_390	0	0.08824	0.0911814	0	0	0	-0.0473059	0	0
Cnl1_1029	3.88189	812.779	0	8231.64	23972.9	0	0	0	0
Cnl1_1028	4.43644	14.8243	3.82962	1.31079	1.33839	0.212203	1.95269	-1.54676	-1.51671
Cnl1_1027	0.277278	4.32376	2.00599	1.57295	0.973372	-2.85491	1.10797	-0.350842	-1.04325
Cnl1_1026	0.0924259	1.05888	0.0911814	0	0	0.019558	3.53766	0	0
Cnl1_1025	0	0	0	0.131079	0.121672	0	0	0	0
Cnl1_1024	0	0.17648	0.182363	0	0.243343	0	-0.0473059	0	0.416181
Cnl1_1023	0	0.26472	0	0	0	0	0	0	0
Cnl1_1022	0	0.17648	0	0	0	0	0	0	0
Cnl1_1021	0.0924259	0.08824	0.0911814	0	0	0.019558	-0.0473059	0	0
Cnl1_1020	0.277278	72.5333	0	298.467	33296.8	0	0	0	0
TCN3-I_517	3.05006	18.001	5.01498	2.22835	5.96191	-0.717408	1.84376	-1.17027	0.249531
TCN3-I_516	0.369704	0.61768	0	0.131079	0.243343	0	0	0	0
TCN3-I_515	0.369704	1.58832	1.64126	0	0.973372	-2.15037	-0.0473059	0	-0.753744
TCN2-I_889	0.0924259	0.08824	0.0911814	0	0	0.019558	-0.0473059	0	0
TCN4-I_1351	0	0	0	0.131079	0	0	0	0	0
TCN2-I_888	0.0924259	0	0	0	0	0	0	0	0
TCN4-I_1350	0	0.08824	0	0	0	0	0	0	0
TCN2-I_887	0.277278	0.17648	0	0	0	0	0	0	0
TCN2-I_886	0.184852	0.17648	0.0911814	0	0.121672	1.01956	0.952694	0	0.416181
TCN2-I_885	10.8138	27.6191	31.2752	43.7804	5.96191	-1.53214	-0.179352	0.485267	-2.39117
TCN2-I_884	0.277278	2.38248	1.82363	0.131079	0.486686	-2.71741	0.385654	-3.7983	-1.90575
TCN3-LTR_782	3.05006	4.67672	6.3827	2.09727	3.65015	-1.06533	-0.448668	-1.60566	-0.806212
TCN2-I_883	0	0.4412	0.182363	0	0	0	1.27462	0	0
TCN3-LTR_781	3.23491	36.8843	0.182363	0.262158	11.6805	4.14884	7.66005	0.523627	6.00114
TCN2-I_882	0.554555	1.23536	0.455907	0.655396	0.608358	0.282592	1.43812	0.523627	0.416181
TCN3-LTR_780	13.1245	57.1795	0.182363	55.7086	0.121672	6.16931	8.29254	8.25495	-0.583819
TCN2-I_881	0.184852	0	0.0911814	0.131079	0	1.01956	0	0.523627	0
Cnl1_1019	0.277278	71.6509	0	307.774	33417.1	0	0	0	0
Cnl1_1018	0.184852	53.0323	0	974.443	16709.6	0	0	0	0
Copia-1_SCH-I_576	0	0	0.0911814	0	0	0	0	0	0
TCN4-I_1349	2.68035	13.8537	11.4889	6.2918	1.46006	-2.09974	0.270035	-0.86869	-2.97614
TCN2-LTR_893	0	0.52944	0.911814	0.262158	0	0	-0.784271	-1.7983	0
TCN2-LTR_892	0	0.26472	0.0911814	0	0.121672	0	1.53766	0	0.416181
TCN2-LTR_891	0	0.52944	0.364726	0.262158	0	0	0.537657	-0.476373	0
TCN2-LTR_890	0	0.17648	0	0	0.243343	0	0	0	0
TCN3-LTR_779	2.68035	25.5896	30.6369	6.02964	0.121672	-3.51478	-0.259714	-2.34513	-7.97614
TCN2-I_513	0.46213	0.79416	0.820632	0	0.851701	-0.828439	-0.0473059	0	0.0536106
TCN2-I_512	0	0.35296	0.455907	0.393238	0	0	-0.369234	-0.213338	0
TCN2-I_511	0	0.17648	0	0.131079	0	0	0	0	0
Cnl1_970	30.7778	1.7648	3.28253	0.131079	0.973372	3.22901	-0.895303	-4.6463	-1.75374
TCN5-I_912	186.7	1280.63	146.346	0.917554	646.563	0.35134	3.12939	-7.31738	2.14341
TCN5-I_911	0.739407	0.4412	0.547088	1.96619	0.243343	0.434596	-0.31034	1.84556	-1.16878
TCN5-I_910	0.554555	3.61784	1.09418	0.131079	1.82507	-0.980442	1.72528	-3.06134	0.738109
Cnl1_969	0.277278	0.08824	0.455907	0	0	-0.717408	-2.36923	0	0
Cnl1_968	0	202.952	0	301.351	25656.8	0	0	0	0
Cnl1_967	1.66367	0.8824	0.63827	2.62158	3.04179	1.38213	0.467267	2.0382	2.25268
Cnl1_966	0.277278	0.26472	0	0	0	0	0	0	0
TCN760_1287	0.0924259	0.17648	0	0	0.121672	0	0	0	0
TCN1-I_872	0.184852	0.17648	0.0911814	0	0.243343	1.01956	0.952694	0	1.41618
Cnl1_965	7.39407	552.206	0	17803.6	84894.9	0	0	0	0
TCN760_1286	0	0.17648	0	0.131079	0	0	0	0	0
TCN1-I_871	4.71372	10.1476	11.0329	18.8754	1.21672	-1.22688	-0.120679	0.774689	-3.18075
Cnl1_964	0.277278	0.8824	0.911814	0.524317	0	-1.71741	-0.0473059	-0.798301	0
TCN760_1285	0.0924259	0	0	0	0	0	0	0	0
Cnl1_963	0.739407	5.55912	6.65624	0	2.06842	-3.17027	-0.259851	0	-1.68618
Cnl1_962	0.46213	1.7648	2.73544	0.786475	0.730029	-2.5654	-0.632268	-1.7983	-1.90575
Helitron-1_ROr_1237	0	0.26472	0	0	0.121672	0	0	0	0
Cnl1_961	0.831833	2.02952	0.911814	2.22835	1.21672	-0.132445	1.15433	1.28916	0.416181
Cnl1_960	0	0	0	0	0	0	0	0	0
TCN2-LTR_514	0.0924259	0.35296	0.273544	0	0.121672	-1.5654	0.367732	0	-1.16878
Gypsy-117_MLP-I_155	0	0.17648	0.182363	0	0	0	-0.0473059	0	0
TCN1-LTR_1255	0.184852	0.35296	0	0.131079	0	0	0	0	0
TCN1-LTR_1254	0.0924259	0.52944	0.364726	0.262158	0.243343	-1.98044	0.537657	-0.476373	-0.583819
TCN1-LTR_1253	0	0.17648	0.0911814	0	0.121672	0	0.952694	0	0.416181
TCN1-LTR_1252	0	0	0	0	0	0	0	0	0
Cnl1_959	0	0.61768	0.364726	0.786475	0	0	0.760049	1.10859	0
Cnl1_958	0.0924259	0.17648	0.273544	0	0	-1.5654	-0.632268	0	0
Cnl1_957	0	0	0	0	0	0	0	0	0
Cnl1_956	0.831833	1.14712	1.4589	2.09727	0	-0.810517	-0.346866	0.523627	0
TCN1-I_500	1.01669	9.44168	7.38569	2.22835	1.58173	-2.86086	0.354311	-1.72876	-2.22323
Cnl1_955	0	0	0	0	0	0	0	0	0
Cnl1_954	0	0.8824	0.0911814	0	0.121672	0	3.27462	0	0.416181
Cnl1_953	0.0924259	1.23536	1.4589	1.17971	0	-3.98044	-0.239951	-0.306448	0
Cnl1_952	0	0	0.0911814	0	0	0	0	0	0
Cnl1_951	0	0	0	0	0	0	0	0	0
TCN10-LTR_679	0	0.17648	0.0911814	0	0	0	0.952694	0	0
Cnl1_950	0.0924259	0	0	0	0	0	0	0	0
TCN4-I_907	1.20154	3.88256	3.55607	3.67022	0.243343	-1.5654	0.126724	0.04558	-3.86922
TCN4-I_906	0.184852	0.8824	0.729451	0.131079	0.121672	-1.98044	0.274622	-2.47637	-2.58382
TCN4-I_905	0	0.52944	0.182363	0.524317	0	0	1.53766	1.52363	0
TCN4-I_904	13.1245	57.1795	0.364726	0.262158	51.7104	5.16931	7.29254	-0.476373	7.1475
Cnl1_949	0.0924259	0.08824	0.0911814	0	0	0.019558	-0.0473059	0	0
Cnl1_948	0	0.70592	0.547088	0.393238	0	0	0.367732	-0.476373	0
Cnl1_947	0.0924259	0.08824	0	0	0	0	0	0	0
Cnl1_946	3.60461	90.7108	0	3487.62	16904.9	0	0	0	0
Cnl1_945	0	44.5612	0	5.24317	136.394	0	0	0	0
Cnl1_944	0.0924259	32.2959	0	871.808	10785.5	0	0	0	0
Cnl1_943	0.0924259	0.52944	0.820632	0	0.608358	-3.15037	-0.632268	0	-0.431816
Cnl1_942	0.0924259	0.8824	0.820632	0.917554	0	-3.15037	0.104697	0.161057	0
Cnl1_941	17.6533	1055.62	0	28177.2	87743.9	0	0	0	0
Cnl1_940	0.277278	1.67656	1.36772	0.524317	0.121672	-2.30237	0.293731	-1.38326	-3.49071
PIF_Harbinger-1_CryNeo_984	0	0	0	0	0	0	0	0	0
LTR12_CN_1069	0	0	0.0911814	0	0	0	0	0	0
LTR12_CN_1068	0	0.08824	0	0	0	0	0	0	0
LTR12_CN_1067	0	0	0	0	0	0	0	0	0
LTR12_CN_1066	0	0.08824	0.0911814	0	0	0	-0.0473059	0	0
LTR12_CN_1065	0	0	0	0	0	0	0	0	0
LTR12_CN_1064	0.277278	0.70592	0.0911814	0	0.365015	1.60452	2.95269	0	2.00114
LTR12_CN_1063	0	0.17648	0.0911814	0	0	0	0.952694	0	0
TCN6-LTR_1284	0	0.08824	0.364726	0	0	0	-2.04731	0	0
TCN6-LTR_1283	0.0924259	0.08824	0	0	0	0	0	0	0
Copia-14_BG-I_154	0	0	0	0	0	0	0	0	0
Cnl1_939	0.277278	1.58832	2.4619	1.57295	0	-3.15037	-0.632268	-0.646298	0
Cnl1_938	0.46213	1.3236	1.73245	0.393238	3.04179	-1.90644	-0.388343	-2.13934	0.812109
Cnl1_937	2.8652	3.61784	5.74443	5.11209	0.851701	-1.00353	-0.667034	-0.16825	-2.75374
Cnl1_936	0.739407	1.05888	1.18536	0.262158	0.365015	-0.680882	-0.162783	-2.17681	-1.6993
Cnl1_935	1.29396	0.61768	0.911814	1.83511	0.486686	0.504985	-0.561879	1.00905	-0.905747
Cnl1_934	0.646981	5.64736	6.20033	2.22835	2.5551	-3.26055	-0.134769	-1.47637	-1.27896
Cnl1_933	10.8138	32.3841	39.5727	15.8606	0.243343	-1.87163	-0.289221	-1.31906	-7.34537
TCN10-LTR_1140	0.46213	0	0	0	0.486686	0	0	0	0
Cnl1_932	3.88189	11.7359	1.55008	2.62158	13.2622	1.32441	2.92051	0.758093	3.0969
Cnl1_931	0.369704	0.70592	1.55008	1.04863	0.730029	-2.0679	-1.13477	-0.563836	-1.08632
Cnl1_930	0.277278	1.7648	2.00599	0	2.31176	-2.85491	-0.184809	0	0.204677
Copia-1_RGl-I_971	0	0	0	0	0	0	0	0	0
Cnl1_929	0.739407	1.41184	1.82363	0.917554	0.121672	-1.30237	-0.369234	-0.990946	-3.90575
Cnl1_928	1287.59	10120.6	428.644	13.6322	3053.83	1.58682	4.56137	-4.97468	2.83277
Cnl1_927	0.46213	2.6472	0.729451	0.131079	0.243343	-0.658514	1.85958	-2.47637	-1.58382
Cnl1_926	0.184852	1.50008	1.18536	1.31079	0.851701	-2.68088	0.339717	0.145116	-0.476904
Gypsy-2_Cop-I_464	0.0924259	0.08824	0.0911814	0	0	0.019558	-0.0473059	0	0
Cnl1_925	0.0924259	1.3236	2.55308	0.131079	2.06842	-4.7878	-0.94777	-4.28373	-0.303711
Cnl1_924	0.277278	3.88256	1.64126	1.44187	0.851701	-2.5654	1.2422	-0.186866	-0.946389
Cnl1_923	16.7291	751.452	0.0911814	22694.3	64029	7.5194	13.0087	17.9252	19.4216
Cnl1_922	18.3928	1115.88	0	29615.2	106961	0	0	0	0
Cnl1_921	3.88189	779.689	0	9005.53	54989	0	0	0	0
TCN6-LTR_117	17.4685	0.08824	0.182363	0	0	6.5818	-1.04731	0	0
LTR11_CN_1240	0.369704	0.70592	0.820632	0	0.486686	-1.15037	-0.217231	0	-0.753744
Cnl1_1305	0.277278	3.26488	2.00599	0.786475	0.973372	-2.85491	0.702716	-1.35084	-1.04325
Cnl1_1304	0.184852	1.23536	1.91481	0.786475	0.973372	-3.37276	-0.632268	-1.28373	-0.976137
Cnl1_1303	0.277278	5.20616	2.55308	1.44187	1.82507	-3.20283	1.02798	-0.824296	-0.484284
Cnl1_1302	12.4775	51.9734	2.18835	3.67022	19.1024	2.51141	4.56986	0.74602	3.12584
Cnl1_1301	33.3658	1520.99	0	48859.6	186455	0	0	0	0
Cnl1_1300	17.3761	1146.94	0	21358.8	99347.9	0	0	0	0
LTR11_CN_1239	0	0.4412	0.273544	0.131079	0.121672	0	0.68966	-1.06134	-1.16878
LTR11_CN_1238	0	0.17648	0.0911814	0	0	0	0.952694	0	0
TCN3-LTR_707	0	0.08824	0	0	0	0	0	0	0
TCN3-LTR_706	0.0924259	0.4412	0.455907	0.131079	0.730029	-2.30237	-0.0473059	-1.7983	0.679215
HARBINGER1_CN_349	0	0	0	0	0	0	0	0	0
TCN3-LTR_705	0	0.17648	0	0	0	0	0	0	0
TCN3-LTR_704	0	0	0	0	0	0	0	0	0
TCN3-LTR_703	0.46213	0.26472	0.182363	0.262158	0	1.34149	0.537657	0.523627	0
Gypsy-63_MLP-I_1233	0	0	0	0	0	0	0	0	0
TCN3-LTR_702	0.0924259	0	0.182363	0	0	-0.980442	0	0	0
TCN3-LTR_701	0.831833	1.14712	1.09418	1.04863	1.21672	-0.395479	0.0681713	-0.0613352	0.153146
TCN3-LTR_700	0.0924259	0.17648	0.182363	0	0.243343	-0.980442	-0.0473059	0	0.416181
TCN10-LTR_985	0.184852	0	0.0911814	0	0.121672	1.01956	0	0	0.416181
TCN760_125	517.4	0.52944	0.0911814	1.70403	1.09504	12.4703	2.53766	4.22407	3.58611
TCN760_124	0	0	0	0	0	0	0	0	0
TCN760_123	0.46213	1.05888	0.455907	0	2.5551	0.019558	1.21573	0	2.48657
TCN760_122	0	0.08824	0.0911814	0	0	0	-0.0473059	0	0
TCN760_121	0	0	0	0	0	0	0	0	0
TCN760_120	0.369704	0.35296	0.182363	0.131079	0.121672	1.01956	0.952694	-0.476373	-0.583819
Copia-6_Trm-I_666	0.369704	0.4412	0.273544	0.524317	0.608358	0.434596	0.68966	0.938665	1.15315
Copia-6_Trm-I_665	7.57892	0.17648	0.0911814	0	0	6.37711	0.952694	0	0
TCN5-I_1171	0.646981	2.55896	3.9208	0.131079	1.33839	-2.59935	-0.61559	-4.90264	-1.55065
TCN5-I_1170	0	0.17648	0.182363	0.131079	0.243343	0	-0.0473059	-0.476373	0.416181
TCN2-LTR_1258	0	0.4412	0.0911814	0	0.365015	0	2.27462	0	2.00114
TCN2-LTR_1257	0	0	0.182363	0	0	0	0	0	0
TCN760_119	2.58793	0.17648	0	0	0	0	0	0	0
TCN2-LTR_1256	0.184852	0.08824	0.0911814	0.131079	0	1.01956	-0.0473059	0.523627	0
TCN760_118	0	0	0.182363	0	0	0	0	0	0
TCN2-LTR_78	0.554555	0	0	0	0	0	0	0	0
TCN2-LTR_77	1.10911	0.17648	0	0	0.121672	0	0	0	0
TCN2-LTR_76	1.29396	0.26472	0	0	0.243343	0	0	0	0
TCN6-I_394	0.0924259	0.70592	0.547088	0	0.243343	-2.5654	0.367732	0	-1.16878
TCN6-I_393	0.0924259	0.08824	0.0911814	0	0	0.019558	-0.0473059	0	0
TCN5-I_1169	0	0	0	0	0	0	0	0	0
TCN5-I_1168	0	0.26472	0.273544	0	0.486686	0	-0.0473059	0	0.831218
TCN5-I_1167	0.277278	1.05888	1.4589	0.917554	0.851701	-2.39548	-0.462343	-0.669018	-0.776464
LTR11_CN_354	0	0	0	0	0	0	0	0	0
LTR11_CN_353	0.184852	0.8824	0.455907	0.786475	0.243343	-1.30237	0.952694	0.786662	-0.905747
LTR11_CN_352	0	0.08824	0.364726	0.131079	0	0	-2.04731	-1.47637	0
LTR11_CN_351	0	0.08824	0.0911814	0	0	0	-0.0473059	0	0
LTR11_CN_350	0	0	0	0	0	0	0	0	0
Mariner-2_SLL_1318	0	0	0.0911814	0.786475	0.121672	0	0	3.10859	0.416181
TCN6-LTR_799	0	0	0	0	0	0	0	0	0
TCN6-LTR_798	0.369704	4.14728	0	0.262158	0	0	0	0	0
HARBINGER1_CN_671	0	0.08824	0.0911814	0.131079	0	0	-0.0473059	0.523627	0
Helitron-1_AN_977	0	0.35296	0.273544	0	1.09504	0	0.367732	0	2.00114
LTR12_CN_66	0.739407	0.08824	0	0	0	0	0	0	0
TCN5-LTR_627	0.184852	0.70592	0.729451	0	0.121672	-1.98044	-0.0473059	0	-2.58382
TCN5-LTR_626	0.0924259	0	0	0	0	0	0	0	0
Gypsy-1_CPu-I_1308	0.184852	2.38248	1.55008	0	0.608358	-3.0679	0.620119	0	-1.34935
LTR11_CN_65	4210.74	1.23536	0.911814	3.01482	0.608358	12.173	0.438121	1.72526	-0.583819
LTR11_CN_64	12591.7	1.14712	3.64726	32.9009	3.16346	11.7534	-1.66879	3.17324	-0.205308
LTR11_CN_63	1863.4	2.29424	0.182363	0.655396	0	13.3188	3.65313	1.84556	0
TCN3-I_1156	0	0.08824	0.182363	0	0	0	-1.04731	0	0
TCN3-I_1155	0.646981	0.79416	0.729451	0.524317	0.243343	-0.173087	0.122619	-0.476373	-1.58382
TCN3-I_1154	0.184852	0.08824	0.455907	0	0.486686	-1.30237	-2.36923	0	0.0942526
TCN3-I_1153	1.01669	1.94128	1.18536	2.09727	0	-0.22145	0.711686	0.823188	0
TCN3-I_1152	0.554555	2.6472	3.00899	0.917554	0.121672	-2.43987	-0.184809	-1.71341	-4.62821
TCN1-I_1251	0	0	0	0.786475	0	0	0	0	0
TCN1-I_1250	0	0.08824	0.182363	0.262158	0	0	-1.04731	0.523627	0
Cnl1_52	17.9306	1202.89	0	32728.1	158921	0	0	0	0
LTR11_CN_675	0	0.17648	0.0911814	0	0	0	0.952694	0	0
Cnl1_51	18.2079	1263.42	0	34457.6	174891	0	0	0	0
LTR11_CN_674	0	0	0	0	0	0	0	0	0
Cnl1_50	18.3928	1275.77	0	34454.4	177626	0	0	0	0
LTR11_CN_673	0	0.8824	0.182363	0.524317	0	0	2.27462	1.52363	0
LTR11_CN_672	0	0.08824	0.0911814	0	0	0	-0.0473059	0	0
Copia-6_Trm-I_974	0.0924259	0.35296	0.729451	0	0.608358	-2.98044	-1.04731	0	-0.261891
Copia-6_Trm-I_973	0.924259	9.79464	8.57105	6.16072	0.121672	-3.2131	0.192521	-0.476373	-6.13841
TCN3-LTR_1270	0	0.17648	0.547088	1.04863	0	0	-1.63227	0.938665	0
TCN1-I_1249	0.184852	1.41184	1.27654	0	0.243343	-2.7878	0.145339	0	-2.39117
TCN1-I_1248	0	0	0	0	0	0	0	0	0
TCN1-I_1247	5.91526	6.52976	6.47388	0.393238	34.433	-0.130189	0.0124004	-4.04116	2.41109
Cnl1_49	17.7458	1291.13	0	34505.9	173465	0	0	0	0
Cnl1_48	19.1322	1280.19	0	34641.3	182562	0	0	0	0
Cnl1_47	18.3928	1235.01	0	33661	173807	0	0	0	0
Cnl1_46	0.554555	255.984	0.455907	7413.84	17453.3	0.282592	9.1331	13.9892	15.2244
Cnl1_45	14.326	563.589	0	19140	57776.7	0	0	0	0
Cnl1_44	11.9229	556.177	0	18856.4	56178.9	0	0	0	0
Cnl1_43	10.4441	469.966	0.0911814	15558	38301.4	6.83974	12.3315	17.3805	18.6802
Cnl1_42	10.629	512.322	0	15608.4	54093	0	0	0	0
Cnl1_41	17.6533	843.398	0	28847.4	91540.2	0	0	0	0
Cnl1_40	7.39407	274.162	0	13051.4	58224.2	0	0	0	0
TCN3-LTR_1269	0	0.08824	0	0	0	0	0	0	0
TCN3-LTR_1268	0	0.17648	0.182363	0	0	0	-0.0473059	0	0
TCN3-LTR_1267	0.184852	0.61768	0.364726	0.524317	0	-0.980442	0.760049	0.523627	0
TCN3-LTR_1266	0.0924259	0.35296	0.455907	0.786475	0	-2.30237	-0.369234	0.786662	0
TCN3-LTR_1265	0	0.52944	0.455907	0.393238	0	0	0.215729	-0.213338	0
TCN3-LTR_1264	3.14248	0.4412	1.18536	0.655396	0	1.40658	-1.42582	-0.854884	0
TCN3-LTR_1263	0	0	0	0	0	0	0	0	0
Gypsy-3_BG-I_157	0	0	0	0	0	0	0	0	0
LTR12_CN_1317	0.0924259	0.08824	0.182363	0	0.121672	-0.980442	-1.04731	0	-0.583819
Cnl1_39	17.0988	949.463	0	32281	122771	0	0	0	0
Cnl1_38	7.94863	743.599	0.273544	24779.1	77874.3	4.86086	11.4085	16.467	18.119
Cnl1_37	15.7124	751.011	0.0911814	27774.1	110240	7.42895	13.0078	18.2166	20.2054
Cnl1_36	0	19.7658	0	1.31079	2.19009	0	0	0	0
Cnl1_35	0	24.8837	0	1.83511	1.82507	0	0	0	0
Cnl1_34	0	27.5309	0	1.83511	2.43343	0	0	0	0
Cnl1_33	0	26.9132	0	1.70403	2.43343	0	0	0	0
Cnl1_32	0	26.472	0	1.83511	2.19009	0	0	0	0
Cnl1_31	0	28.0603	0	1.96619	2.43343	0	0	0	0
Cnl1_30	0	27.5309	0	1.83511	2.43343	0	0	0	0
Cnl1_29	0	20.4717	0	1.57295	1.82507	0	0	0	0
Cnl1_28	0	27.5309	0	1.83511	2.43343	0	0	0	0
Cnl1_27	0	25.8543	0	1.70403	2.19009	0	0	0	0
Cnl1_26	0	26.3838	0	1.83511	1.7034	0	0	0	0
Cnl1_25	0	20.4717	0	1.57295	2.31176	0	0	0	0
Cnl1_24	0	27.5309	0	1.83511	2.43343	0	0	0	0
Cnl1_23	0	24.4425	0	1.96619	1.7034	0	0	0	0
Cnl1_22	9.51987	738.922	0.0911814	23413.9	96666.1	6.70606	12.9844	17.9702	20.0158
Cnl1_21	14.7881	933.138	0.0911814	28452.3	134650	7.34149	13.3211	18.2514	20.494
Cnl1_20	16.8215	1025.08	0	31288.1	150598	0	0	0	0
Copia-6_Trm-I_1231	0	0.26472	0.547088	0	0	0	-1.04731	0	0
Copia-6_Trm-I_1230	0	0.26472	0.364726	0.131079	0.243343	0	-0.462343	-1.47637	-0.583819
Zisupton-3_PGr_714	0.924259	8.91224	0.182363	0.917554	11.3155	2.34149	5.61091	2.33098	5.95534
Cnl1_19	16.3594	1020.23	0	29254.6	157484	0	0	0	0
Cnl1_18	7.8562	849.663	0	22360	134661	0	0	0	0
Cnl1_17	14.6957	895.901	0	26754.6	142148	0	0	0	0
Cnl1_16	13.4942	1015.55	0	29313	140095	0	0	0	0
Cnl1_15	17.0988	1035.67	0	29295	146857	0	0	0	0
Cnl1_14	12.6623	984.141	0.0911814	27826.7	154252	7.11759	13.3978	18.2193	20.69
Cnl1_13	13.0321	1056.5	0	30966.1	150716	0	0	0	0
Cnl1_12	16.0821	1019.53	0	30530.3	159037	0	0	0	0
Cnl1_11	15.1578	1054.29	0	31171.5	147348	0	0	0	0
Cnl1_10	16.4518	1046.17	0.182363	32044	138746	6.49529	12.486	17.4229	19.5372
Copia-6_Trm-I_1229	0	0.79416	1.4589	0.131079	0	0	-0.877381	-3.47637	0
Gypsy-23_ADe-I_61	0	0.08824	0	0	0	0	0	0	0
TCN5-LTR_916	0	0.97064	1.003	0.655396	0	0	-0.0473059	-0.613876	0
TCN1-I_197	0	0.08824	0.0911814	0	0	0	-0.0473059	0	0
TCN5-LTR_915	0	0.08824	0.455907	0	0.121672	0	-2.36923	0	-1.90575
TCN1-I_196	0	0.17648	0.0911814	0	0	0	0.952694	0	0
TCN5-LTR_914	0.184852	0	0	0	0	0	0	0	0
TCN1-I_195	0	0.35296	0	0.131079	0	0	0	0	0
TCN5-LTR_913	0.184852	0	0	0	0	0	0	0	0
TCN1-I_194	5.17585	6.1768	7.02097	9.4377	7.05695	-0.439874	-0.184809	0.426766	0.00737515
TCN1-I_193	0.46213	1.3236	0.547088	0.786475	0.121672	-0.243476	1.27462	0.523627	-2.16878
CACTA-1_Ccinerea_126	0	0.08824	0.364726	0	0.365015	0	-2.04731	0	0.0011432
LTR11_CN_981	0	2.6472	0.273544	0	0	0	3.27462	0	0
LTR11_CN_980	0.0924259	0.4412	0.63827	0.131079	0	-2.7878	-0.532733	-2.28373	0
Copia-58_BG-I_1134	0	0	0	0	0	0	0	0	0
TCN4-I_230	0	0.08824	0	0	0	0	0	0	0
LTR11_CN_979	0	0.52944	0	0	0	0	0	0	0
LTR11_CN_978	0	0.26472	0	0	0	0	0	0	0
Cnl1_272	0.0924259	1.67656	1.82363	1.04863	0	-4.30237	-0.121306	-0.798301	0
Cnl1_271	0.0924259	4.14728	3.00899	0.917554	2.5551	-5.02484	0.462889	-1.71341	-0.235896
Cnl1_270	10.9987	51.7087	1.82363	1.57295	16.0606	2.59245	4.82552	-0.213338	3.13865
Gypsy-20_PGr-I_585	0.277278	0.52944	0.273544	0.655396	0	0.019558	0.952694	1.26059	0
TCN4-I_229	0	0.17648	0	0	0	0	0	0	0
TCN4-I_228	0.184852	0.61768	0.364726	0	0.121672	-0.980442	0.760049	0	-1.58382
TCN4-I_227	0.554555	1.67656	0.182363	0.262158	0.243343	1.60452	3.20062	0.523627	0.416181
TCN4-I_226	0.277278	0.52944	0.182363	0.917554	0	0.604521	1.53766	2.33098	0
Cnl1_269	17.0064	1010.17	0.364726	30204.4	113377	5.54312	11.4355	16.3376	18.2459
Cnl1_268	18.2079	1196.09	0	23945.7	98225.7	0	0	0	0
Cnl1_267	18.4852	1318.31	0	33787.9	164496	0	0	0	0
Cnl1_266	0.0924259	0.17648	0.182363	0	0	-0.980442	-0.0473059	0	0
Cnl1_265	0.184852	0.17648	0	0	0.121672	0	0	0	0
Cnl1_264	0.277278	0	0.0911814	0	0	1.60452	0	0	0
Cnl1_263	0.0924259	0.4412	0.455907	0.262158	0	-2.30237	-0.0473059	-0.798301	0
Cnl1_262	6.10011	26.1191	24.3454	10.6174	0.365015	-1.99674	0.101452	-1.19722	-6.05955
Cnl1_261	0	228.895	0	303.055	24095.2	0	0	0	0
Cnl1_260	1.10911	9.97112	0.911814	0.917554	11.9238	0.282592	3.45094	0.00905411	3.70896
TCN4-LTR_1275	0	0.17648	0.273544	0	0	0	-0.632268	0	0
Copia-53_MLP-I_578	0	0	0.273544	0	0	0	0	0	0
Cnl1_259	12.4775	590.326	0	21073.6	91328.1	0	0	0	0
Cnl1_258	10.3517	31.237	37.7491	15.3363	0	-1.86657	-0.273187	-1.29949	0
Cnl1_257	15.5276	904.372	0.0911814	25528.1	96989.4	7.41188	13.2759	18.0949	20.0207
Cnl1_256	0.739407	1.94128	1.64126	0	1.94674	-1.15037	0.242201	0	0.246256
TCN6-I_632	0.184852	0.17648	0.273544	0.131079	0	-0.565404	-0.632268	-1.06134	0
Cnl1_255	0	54.5323	0	13.5012	138.584	0	0	0	0
TCN6-I_631	0	0.4412	0.820632	0.262158	0.486686	0	-0.895303	-1.6463	-0.753744
Cnl1_254	0.0924259	0	0.182363	0	0.243343	-0.980442	0	0	0.416181
TCN6-I_630	1.75609	10.0594	8.66223	0.393238	4.74519	-2.30237	0.215729	-4.46127	-0.868273
Cnl1_253	1.66367	0	0	2.62158	2.5551	0	0	0	0
Cnl1_252	3.78946	150.979	0	4715.05	19267.8	0	0	0	0
Cnl1_251	0.184852	110.477	0	3597.86	8498.03	0	0	0	0
TCN1-LTR_366	0	0	0.0911814	0.131079	0	0	0	0.523627	0
TCN1-LTR_365	0	0.35296	0.547088	0	0.121672	0	-0.632268	0	-2.16878
TCN1-LTR_364	0	0.08824	0.0911814	0	0	0	-0.0473059	0	0
TCN1-LTR_363	0.0924259	0.4412	0	0.131079	0	0	0	0	0
TCN1-LTR_362	0.184852	0.61768	0.911814	0.262158	0.243343	-2.30237	-0.561879	-1.7983	-1.90575
TCN1-LTR_361	0.0924259	0.08824	0.273544	0	0.365015	-1.5654	-1.63227	0	0.416181
TCN1-LTR_360	0	0	0	0	0	0	0	0	0

## Sheet: Transposon sense + AS sRNAs
Small RNA libraries mapped to the Bt65 genome sequence							Reference genome: Bt65_Chr_FINAL_Feb2021.fasta
	H99 (S12)			Bt81 (S25)			Bt65 (S24)			Bt65::ZNF3-T1 (S16)			Bt65::ZNF3-T2 (S17)
ID	Sense	Antisense	Total	Sense	Antisense	Total	Sense	Antisense	Total	Sense	Antisense	Total	Sense	Antisense	Total
TCN6-I_629	0	0	0	0	0	0	1	1	2	0	0	0	0	0	0
TCN6-I_628	0	0	0	0	0	0	0	0	0	0	0	0	0	1	1
Harbinger-2_SLL_468	2	0	2	1	0	1	0	1	1	0	0	0	1	0	1
Gypsy-62_BG-LTR_158	0	0	0	0	0	0	0	0	0	0	0	0	0	0	0
PIF_Harbinger-1_CryNeo_278	2	1	3	1	0	1	0	0	0	0	1	1	0	1	1
PIF_Harbinger-1_CryNeo_277	0	0	0	0	1	1	0	0	0	0	0	0	0	1	1
PIF_Harbinger-1_CryNeo_276	0	0	0	0	0	0	0	0	0	2	0	2	0	0	0
Copia-1_SCH-I_53	0	0	0	0	0	0	2	0	2	3	0	3	2	0	2
LTR12_CN_485	0	0	0	0	0	0	0	0	0	0	0	0	0	0	0
LTR12_CN_484	0	0	0	0	0	0	0	0	0	0	0	0	0	0	0
TCN3-LTR_383	0	4	4	0	1	1	0	0	0	0	0	0	0	2	2
TCN3-LTR_382	0	0	0	2	6	8	2	0	2	2	0	2	0	0	0
TCN3-LTR_381	2	0	2	0	1	1	0	2	2	1	3	4	3	0	3
TCN3-LTR_380	1	1	2	2	0	2	1	0	1	2	0	2	0	0	0
TCN2-I_75	0	1	1	0	1	1	0	0	0	0	0	0	0	0	0
TCN6-I_1282	3	4	7	19	10	29	14	9	23	20	5	25	14	4	18
TCN6-I_1281	0	0	0	1	1	2	3	0	3	1	1	2	2	0	2
TCN6-I_1280	0	1	1	2	2	4	5	1	6	1	1	2	0	2	2
TCN3-LTR_379	2	0	2	2	1	3	2	0	2	0	0	0	1	0	1
TCN3-LTR_378	1	0	1	1	1	2	2	4	6	0	2	2	0	3	3
TCN5-I_525	0	0	0	7	1	8	4	1	5	5	0	5	2	0	2
TCN3-LTR_377	0	0	0	0	1	1	1	0	1	0	0	0	1	0	1
TCN3-LTR_376	0	1	1	0	0	0	0	0	0	0	0	0	0	0	0
Cnl1_575	0	4	4	5	8	13	3	10	13	2	1	3	0	1	1
Cnl1_574	4	1	5	18	11	29	17	13	30	8	6	14	12	9	21
Copia-14_BG-I_1046	0	0	0	0	3	3	0	4	4	0	1	1	0	1	1
Copia-58_BG-I_858	0	0	0	4	0	4	2	0	2	3	0	3	0	0	0
Cnl1_573	1	0	1	12	32	44	6	27	33	7	21	28	53	24	77
Cnl1_572	14	187	201	13892	508	14400	0	0	0	232328	1002182	1234510	224875	1277686	1502561
Cnl1_571	0	0	0	0	3	3	0	1	1	0	0	0	0	0	0
Cnl1_570	1	0	1	0	0	0	0	0	0	0	0	0	0	0	0
TCN1-LTR_683	0	1	1	0	7	7	0	7	7	1	3	4	1	1	2
TCN1-LTR_682	13	1	14	27	3	30	6	0	6	18	3	21	12	1	13
TCN1-LTR_681	1	1	2	5	0	5	4	0	4	1	0	1	1	0	1
TCN4-I_524	0	0	0	1	0	1	1	2	3	1	0	1	1	1	2
TCN4-I_523	3	0	3	3	1	4	4	2	6	3	0	3	2	1	3
TCN3-LTR_90	8	952	960	2	0	2	0	0	0	3	2	5	0	0	0
Cnl1_569	0	2	2	0	0	0	0	0	0	0	1	1	0	0	0
TCN4-I_522	2	0	2	3	0	3	1	1	2	19	0	19	12	0	12
Cnl1_568	1	0	1	3	2	5	0	0	0	1	0	1	2	0	2
TCN4-I_521	0	0	0	0	2	2	0	0	0	0	0	0	0	1	1
Cnl1_567	1	0	1	3	2	5	0	8	8	2	6	8	0	2	2
Cnl1_566	0	0	0	1	0	1	1	0	1	0	0	0	0	0	0
Cnl1_565	0	2	2	0	0	0	0	0	0	0	1	1	0	0	0
Cnl1_564	0	0	0	3	0	3	4	0	4	0	0	0	4	0	4
Cnl1_563	0	0	0	0	0	0	0	1	1	0	2	2	0	1	1
Cnl1_562	1	0	1	0	1	1	0	0	0	0	0	0	0	0	0
Copia-1_SCH-I_153	0	0	0	0	1	1	0	0	0	0	0	0	0	0	0
Cnl1_561	0	54	54	7101	238	7339	0	0	0	116142	942458	1058600	93615	802558	896173
Cnl1_560	0	1	1	0	1	1	0	2	2	0	0	0	0	2	2
TCN10-LTR_280	1	0	1	1	2	3	0	0	0	1	0	1	1	0	1
Copia-58_BG-I_57	0	4	4	2	8	10	1	4	5	0	2	2	0	5	5
Copia-58_BG-I_56	3	5	8	2	22	24	0	0	0	0	10	10	3	9	12
TCN3-LTR_89	606	31796	32402	8	4	12	0	0	0	8	12	20	2	10	12
Copia-58_BG-I_55	0	1	1	0	2	2	0	1	1	0	1	1	0	0	0
TCN3-LTR_88	854	23959	24813	2	2	4	0	0	0	4	11	15	1	12	13
Copia-58_BG-I_54	0	0	0	1	4	5	0	1	1	1	2	3	1	0	1
TCN3-LTR_87	638	46297	46935	7	6	13	0	0	0	6	12	18	2	20	22
TCN3-LTR_86	8	15098	15106	0	2	2	0	0	0	0	2	2	0	8	8
Cnl1_559	0	0	0	0	0	0	1	0	1	0	0	0	0	0	0
Cnl1_558	0	1	1	0	0	0	1	0	1	0	0	0	0	1	1
Cnl1_557	0	0	0	0	0	0	0	0	0	0	0	0	0	0	0
Cnl1_556	0	0	0	1	0	1	0	0	0	1	0	1	1	0	1
Cnl1_555	0	0	0	0	3	3	0	4	4	0	1	1	0	1	1
Cnl1_554	10	40	50	463	28	491	0	0	0	35573	122706	158279	34128	136480	170608
Cnl1_553	0	0	0	737	18	755	0	0	0	1430	73861	75291	713	3403	4116
Cnl1_552	4	7	11	7	16	23	2	10	12	6	14	20	6	11	17
TCN5-LTR_1279	0	0	0	1	0	1	0	0	0	0	2	2	0	0	0
Cnl1_551	6	10	16	30	10	40	29	6	35	20	6	26	18	7	25
Cnl1_550	0	0	0	5	6	11	1	6	7	2	5	7	0	3	3
TCN10-LTR_279	68	0	68	56	1	57	57	0	57	262	0	262	259	0	259
TCN4-I_1274	0	0	0	0	15	15	0	3	3	7	1	8	8	5	13
TCN4-I_1273	0	0	0	0	1	1	0	0	0	0	1	1	0	1	1
TCN4-I_1272	6	0	6	1	6	7	0	2	2	0	2	2	0	3	3
TCN4-I_1271	0	0	0	1	0	1	0	1	1	0	0	0	1	1	2
Gypsy-62_BG-LTR_466	2	0	2	0	0	0	0	0	0	0	0	0	0	0	0
Cnl1_549	1	0	1	3	2	5	5	2	7	1	0	1	1	0	1
Cnl1_548	2	2	4	24	14	38	6	3	9	3	187	190	0	345	345
Cnl1_547	2	1	3	4	9	13	3	9	12	74	5	79	122	1	123
Cnl1_546	1	116	117	13	567	580	12	6	18	11	130	141	7	93	100
Cnl1_545	13	168	181	9561	328	9889	0	1	1	200143	650004	850147	200183	761702	961885
Cnl1_1299	14	170	184	12592	452	13044	0	0	0	155264	906976	1062240	160642	656212	816854
Cnl1_544	14	171	185	10618	371	10989	0	0	0	159217	568502	727719	165207	649576	814783
Cnl1_1298	2	3	5	0	3	3	0	4	4	2	1	3	0	3	3
Cnl1_543	14	152	166	9435	363	9798	1	0	1	170404	575085	745489	169932	668407	838339
Cnl1_1297	1	41	42	8551	322	8873	0	0	0	55980	558564	614544	67544	237016	304560
Cnl1_542	0	0	0	953	21	974	0	0	0	1543	58555	60098	788	3347	4135
Cnl1_1296	4	1	5	12	11	23	17	16	33	6	9	15	7	8	15
Cnl1_1295	0	4	4	718	58	776	0	0	0	13072	240754	253826	9077	378216	387293
Cnl1_1294	0	2	2	548	46	594	0	0	0	8321	194622	202943	5907	293039	298946
Cnl1_1293	0	0	0	0	0	0	0	0	0	0	0	0	0	0	0
Cnl1_1292	0	0	0	0	0	0	0	1	1	1	2	3	0	3	3
Cnl1_1291	0	0	0	1	0	1	3	0	3	1	0	1	2	0	2
Cnl1_1290	0	1	1	966	48	1014	0	0	0	468	4915	5383	819	10225	11044
TCN3-LTR_699	1	1	2	0	0	0	0	0	0	1	0	1	0	0	0
TCN3-LTR_698	0	0	0	0	6	6	0	5	5	0	8	8	0	4	4
TCN3-LTR_697	1	0	1	0	1	1	0	1	1	0	1	1	0	0	0
TCN3-LTR_696	0	11	11	0	5	5	0	0	0	0	0	0	0	0	0
TCN3-LTR_695	0	0	0	0	0	0	2	0	2	0	0	0	0	0	0
TCN6-I_917	11	8210	8221	10	79386	79396	3	35579	35582	12	18831	18843	6	14973	14979
Cnl1_1289	0	3	3	1033	39	1072	0	0	0	27840	117818	145658	22559	174069	196628
Cnl1_1288	0	4	4	973	50	1023	0	0	0	21121	189915	211036	16158	292869	309027
TCN3-I_778	5	86	91	17	14	31	10	7	17	5	339	344	9	366	375
Harbinger-2_SLL_750	0	1	1	2	0	2	0	1	1	0	1	1	0	0	0
TCN2-I_773	7	3	10	17	31	48	10	25	35	15	10	25	20	9	29
TCN2-I_772	8210	14	8224	79404	35	79439	35593	21	35614	18835	15	18850	14979	11	14990
TCN2-I_771	1	0	1	3	0	3	0	0	0	4	0	4	3	0	3
TCN2-I_770	2	0	2	22	2	24	4	2	6	7	1	8	9	0	9
TCN10-LTR_597	2	0	2	3	1	4	0	0	0	0	0	0	1	1	2
TCN1-LTR_988	5	0	5	60	0	60	1	0	1	3	0	3	1	0	1
TCN1-LTR_987	0	0	0	0	0	0	2	1	3	2	0	2	1	0	1
TCN1-LTR_986	0	0	0	0	0	0	0	0	0	0	0	0	0	0	0
TCN4-LTR_107	0	7	7	1	19	20	0	0	0	0	4	4	1	4	5
TCN4-LTR_106	0	4	4	1	19	20	0	0	0	0	4	4	1	4	5
TCN4-LTR_105	0	5	5	1	19	20	0	0	0	0	4	4	1	4	5
TCN2-I_769	0	0	0	0	0	0	1	0	1	0	0	0	2	0	2
TCN4-LTR_104	0	4	4	1	16	17	0	0	0	0	3	3	1	4	5
TCN2-I_768	1	1	2	2	3	5	1	6	7	0	1	1	0	3	3
TCN4-LTR_103	0	6	6	1	13	14	0	0	0	1	4	5	1	3	4
TCN2-I_767	1	7	8	3	3	6	6	1	7	4	15	19	4	24	28
TCN3-LTR_303	0	2	2	0	8	8	0	4	4	0	1	1	0	2	2
TCN4-LTR_102	7	6	13	1	13	14	0	0	0	0	4	4	1	3	4
TCN2-I_766	0	2	2	0	0	0	0	3	3	2	0	2	2	2	4
TCN3-LTR_302	2	0	2	0	1	1	0	0	0	0	0	0	0	1	1
TCN4-LTR_101	0	5	5	1	18	19	0	0	0	0	4	4	1	4	5
TCN2-I_765	0	0	0	3	1	4	1	1	2	4	0	4	1	1	2
TCN3-LTR_301	0	1	1	1	0	1	0	1	1	0	0	0	0	0	0
TCN4-LTR_100	5	4	9	1	19	20	0	0	0	0	4	4	2	5	7
TCN3-LTR_300	2	0	2	1	5	6	4	1	5	2	1	3	2	2	4
PIF_Harbinger-1_CryNeo_1246	0	0	0	1	0	1	0	1	1	0	0	0	0	0	0
TCN10-LTR_1072	0	0	0	7	0	7	4	1	5	1	0	1	0	0	0
PIF_Harbinger-1_CryNeo_1245	2	0	2	9	0	9	9	0	9	5	0	5	2	0	2
PIF_Harbinger-1_CryNeo_1244	0	0	0	1	3	4	0	1	1	0	3	3	0	2	2
PIF_Harbinger-1_CryNeo_1243	0	0	0	2	0	2	1	0	1	1	0	1	0	0	0
PIF_Harbinger-1_CryNeo_1242	0	0	0	1	0	1	1	0	1	0	0	0	0	0	0
TCN2-I_1331	4	5	9	16	37	53	8	29	37	4	20	24	4	16	20
TCN2-I_1330	32	15	47	95	59	154	34	56	90	53	26	79	77	30	107
TCN2-LTR_777	0	0	0	0	2	2	0	1	1	0	2	2	0	0	0
TCN2-LTR_776	2	0	2	8	0	8	10	0	10	3	0	3	3	0	3
TCN2-LTR_775	2	0	2	0	0	0	0	0	0	0	0	0	0	0	0
TCN2-LTR_774	0	2	2	4	0	4	1	1	2	1	0	1	1	1	2
TCN2-I_1329	747	0	747	982	1	983	1031	1	1032	1919	0	1919	1700	1	1701
Cnl1_856	9	2	11	17	4	21	9	3	12	5	2	7	3	2	5
TCN2-I_1328	2	0	2	7	1	8	2	1	3	1	0	1	0	0	0
TCN760_1177	0	0	0	2	0	2	3	0	3	0	0	0	1	0	1
Cnl1_855	4	11	15	25	4	29	24	5	29	8	0	8	4	4	8
TCN760_1176	0	0	0	1	0	1	1	0	1	1	0	1	0	0	0
Cnl1_854	37	702	739	1	0	1	0	0	0	0	1	1	1	0	1
Cnl1_853	0	0	0	2	0	2	2	0	2	0	0	0	0	0	0
Cnl1_852	0	0	0	10	1	11	5	1	6	4	1	5	0	0	0
Cnl1_851	4	0	4	10	1	11	1	1	2	5	0	5	1	1	2
Cnl1_850	14062	525	14587	1	2	3	2	0	2	3	1	4	2	0	2
TCN1-LTR_605	0	0	0	0	0	0	0	0	0	0	0	0	0	0	0
TCN1-LTR_604	1	0	1	9	1	10	3	0	3	1	0	1	1	0	1
TCN1-LTR_603	1	0	1	2	0	2	2	0	2	4	0	4	1	1	2
TCN1-LTR_1147	0	10	10	4	11	15	0	1	1	0	0	0	0	5	5
TCN1-LTR_1146	2	0	2	4	1	5	6	0	6	4	0	4	1	0	1
TCN1-LTR_602	0	0	0	0	0	0	0	0	0	0	0	0	0	0	0
TCN1-LTR_1145	0	6	6	5	114	119	9	99	108	3	21	24	2	16	18
TCN1-LTR_601	0	0	0	0	1	1	0	1	1	0	0	0	0	0	0
TCN1-LTR_1144	0	1	1	3	0	3	1	0	1	0	1	1	2	0	2
TCN1-LTR_600	1	0	1	1	0	1	0	0	0	0	0	0	0	1	1
TCN1-LTR_1143	2	0	2	3	4	7	2	7	9	6	4	10	3	3	6
TCN1-I_759	0	1	1	0	2	2	0	0	0	0	2	2	0	1	1
TCN1-I_758	0	0	0	2	0	2	0	0	0	0	0	0	0	0	0
Copia-1_SLL-I_577	0	0	0	0	0	0	0	1	1	1	0	1	0	0	0
Cnl1_849	5	0	5	16	2	18	11	2	13	11	0	11	7	0	7
Cnl1_848	4	1	5	5	8	13	7	12	19	4	6	10	5	6	11
Cnl1_847	1	4	5	0	4	4	0	4	4	1	2	3	0	1	1
Cnl1_846	1	1	2	3	12	15	2	11	13	8	7	15	1	2	3
Cnl1_845	0	0	0	0	0	0	0	0	0	0	0	0	0	0	0
Cnl1_844	4885	104	4989	0	0	0	0	0	0	0	0	0	0	0	0
Cnl1_843	7	471	478	0	0	0	1	0	1	0	0	0	1	0	1
Cnl1_842	20	8	28	0	2	2	0	0	0	2	2	4	0	0	0
Cnl1_841	1191	415	1606	1	4	5	0	0	0	0	2	2	0	4	4
Cnl1_840	0	0	0	0	0	0	0	1	1	1	0	1	0	0	0
Gypsy-119_MLP-I_1309	0	0	0	4	2	6	2	0	2	3	1	4	3	0	3
TCN5-LTR_236	0	0	0	0	4	4	0	0	0	0	1	1	0	1	1
TCN5-LTR_235	0	1	1	0	0	0	0	1	1	0	0	0	1	0	1
TCN6-LTR_395	0	0	0	1	0	1	0	0	0	0	0	0	0	0	0
TCN5-LTR_234	0	0	0	0	1	1	0	0	0	0	0	0	0	0	0
TCN5-LTR_233	2	0	2	2	0	2	1	0	1	3	0	3	5	0	5
TCN5-LTR_232	0	0	0	0	0	0	0	1	1	0	0	0	0	0	0
TCN5-LTR_231	0	1	1	1	0	1	1	1	2	1	0	1	0	0	0
TCN4-LTR_792	0	0	0	1	0	1	0	0	0	0	3	3	0	0	0
TCN4-LTR_791	1	1	2	0	2	2	0	2	2	0	2	2	0	0	0
Cnl1_839	2	0	2	6	0	6	6	0	6	5	0	5	2	0	2
TCN4-LTR_790	0	1	1	0	0	0	0	0	0	0	1	1	0	1	1
Cnl1_838	4	0	4	47	2	49	0	1	1	2	1	3	0	1	1
Cnl1_837	0	0	0	0	1	1	0	0	0	0	4	4	0	0	0
Cnl1_836	0	1	1	0	5	5	1	0	1	0	0	0	0	1	1
Cnl1_1228	3	1	4	4	2	6	8	8	16	0	6	6	0	3	3
Cnl1_835	0	0	0	0	2	2	1	1	2	0	0	0	0	0	0
Cnl1_1227	1301	36803	38104	47	19	66	30	11	41	954	14525	15479	1213	23991	25204
Cnl1_834	0	0	0	0	0	0	0	0	0	0	0	0	0	0	0
Cnl1_1226	4	1	5	9	50	59	8	54	62	5	18	23	7	14	21
Cnl1_833	0	0	0	0	0	0	1	0	1	0	0	0	0	0	0
Cnl1_1225	2	0	2	9	5	14	9	12	21	6	8	14	4	8	12
Cnl1_832	0	0	0	2	1	3	1	1	2	61	0	61	117	0	117
Cnl1_1224	2	1	3	25	31	56	6	22	28	11	13	24	57	15	72
Cnl1_831	1	0	1	0	0	0	0	1	1	0	0	0	0	0	0
Cnl1_1223	8	127	135	7	579	586	4	16	20	25	157	182	3	99	102
Cnl1_830	1	1	2	3	1	4	1	1	2	0	0	0	0	0	0
Cnl1_1222	11	139	150	10944	393	11337	0	0	0	203231	1240876	1444107	172756	1146008	1318764
Cnl1_1221	14	178	192	13383	475	13858	0	0	0	222757	922711	1145468	216468	1159001	1375469
Cnl1_1220	0	1	1	2	1	3	1	0	1	2	0	2	0	0	0
Gypsy-10_MLP-I_859	0	0	0	0	0	0	0	0	0	0	0	0	0	0	0
TCN4-LTR_789	0	1	1	0	1	1	0	2	2	0	2	2	0	0	0
TCN6-LTR_1175	0	0	0	0	0	0	1	0	1	0	0	0	0	0	0
Cnl1_829	0	0	0	0	3	3	0	3	3	0	2	2	0	1	1
Cnl1_828	0	1	1	1140	32	1172	0	0	0	29450	79727	109177	24363	107177	131540
Cnl1_827	0	1	1	831	38	869	0	0	0	19027	96776	115803	16058	126869	142927
Cnl1_1219	0	1	1	0	0	0	0	1	1	0	1	1	0	1	1
Cnl1_826	0	2	2	497	43	540	0	0	0	8352	176540	184892	6201	264438	270639
Cnl1_1218	0	0	0	1	0	1	2	0	2	1	0	1	0	0	0
Cnl1_825	0	2	2	487	39	526	0	0	0	7777	138240	146017	5542	204295	209837
Gypsy-84_MLP-I_1055	0	0	0	0	0	0	3	0	3	0	0	0	0	1	1
Cnl1_1217	0	3	3	1	5	6	0	7	7	1	3	4	0	2	2
Cnl1_824	0	1	1	2	4	6	0	1	1	0	1	1	2	2	4
Cnl1_1216	0	1	1	4	11	15	3	11	14	0	2	2	2	8	10
Cnl1_823	3	1	4	8	3	11	10	3	13	4	3	7	4	3	7
Cnl1_1215	12	143	155	4078	172	4250	0	0	0	130776	519593	650369	113931	621317	735248
Cnl1_822	18051	737	18788	4	11	15	1	0	1	6	3	9	7	3	10
Cnl1_1214	0	10	10	4066	163	4229	0	0	0	45096	766364	811460	35610	594667	630277
Cnl1_821	2192	102	2294	0	253	253	0	1	1	0	193	193	1	157	158
Cnl1_1213	0	1	1	3	0	3	5	0	5	2	0	2	1	0	1
Cnl1_820	1	41	42	8411	320	8731	0	0	0	55277	547963	603240	67123	233029	300152
Cnl1_1212	0	0	0	2	0	2	1	2	3	0	0	0	0	0	0
Cnl1_1211	1	22	23	10096	313	10409	0	0	0	139511	620268	759779	137175	879850	1017025
Cnl1_1210	1	7	8	0	19	19	1	24	25	1	10	11	0	6	6
TCN3-LTR_618	1	4	5	7	1	8	1	4	5	5	2	7	6	2	8
TCN3-LTR_617	1	1	2	1	0	1	2	0	2	0	0	0	2	0	2
Cnl1_819	4310	101292	105602	27	7	34	10	27	37	7	55	62	9	29	38
Cnl1_818	56	7595	7651	45	39	84	3	1	4	11	22	33	9	17	26
Cnl1_817	31826	1002	32828	4	25	29	0	0	0	5	8	13	4	9	13
Cnl1_1209	0	0	0	0	3	3	0	1	1	0	1	1	0	0	0
Cnl1_816	612	21	633	2	1	3	0	1	1	0	0	0	0	0	0
Cnl1_1208	1	3	4	1	6	7	8	7	15	4	4	8	1	5	6
Cnl1_815	36453	703	37156	6	6	12	14	4	18	10	1	11	13	0	13
Cnl1_1207	0	0	0	0	0	0	1	0	1	0	0	0	0	0	0
Cnl1_814	24	5	29	7	4	11	4	2	6	4	1	5	1	0	1
Cnl1_1206	0	0	0	0	0	0	0	1	1	0	0	0	0	0	0
Cnl1_813	1	0	1	3	10	13	3	8	11	0	1	1	3	0	3
Cnl1_1205	0	0	0	0	0	0	3	0	3	0	0	0	1	0	1
Copia-6_Trm-I_581	0	0	0	4	1	5	2	1	3	0	2	2	0	2	2
Cnl1_812	1	1	2	3	8	11	4	8	12	5	3	8	3	3	6
Cnl1_1204	0	1	1	0	0	0	0	3	3	0	0	0	0	2	2
Copia-6_Trm-I_580	0	0	0	0	2	2	0	1	1	0	0	0	0	0	0
Cnl1_811	5	8	13	15	5	20	14	7	21	17	9	26	14	12	26
Gypsy-20_BG-I_670	0	0	0	0	0	0	0	0	0	0	0	0	1	0	1
Cnl1_1203	0	0	0	0	0	0	1	0	1	0	0	0	1	0	1
Cnl1_810	26881	23	26904	191554	47	191601	225	12	237	54912	34	54946	52463	27	52490
Cnl1_1202	2	0	2	8	0	8	8	0	8	16	1	17	9	0	9
Cnl1_1201	3	3	6	1	2	3	0	2	2	3	0	3	2	0	2
Cnl1_1200	0	0	0	2	0	2	0	0	0	0	0	0	1	0	1
TCN760_396	0	0	0	0	1	1	0	2	2	0	0	0	0	1	1
LTR11_CN_1138	1	0	1	1	0	1	1	2	3	2	0	2	1	0	1
LTR11_CN_1137	0	0	0	1	0	1	0	0	0	3	0	3	1	0	1
LTR11_CN_1136	0	0	0	0	0	0	0	0	0	0	0	0	0	0	0
TCN4-I_98	0	0	0	0	1	1	0	0	0	0	0	0	0	0	0
TCN4-I_97	0	0	0	0	1	1	0	0	0	0	0	0	0	0	0
Copia-6_Trm-I_579	0	0	0	6	1	7	2	1	3	1	1	2	0	0	0
TCN4-I_96	147	4412	4559	4	9	13	0	3	3	1	3	4	2	4	6
Cnl1_809	1	24	25	5	8	13	3	7	10	1	10	11	0	35	35
TCN4-I_95	2867	71530	74397	14	80	94	0	7	7	8	51	59	15	137	152
Cnl1_808	0	2	2	5	7	12	2	10	12	1	1	2	0	1	1
TCN4-I_94	3000	75498	78498	14	77	91	0	8	8	9	51	60	14	134	148
Cnl1_807	1301	36805	38106	32	10	42	9	7	16	851	14526	15377	1059	23987	25046
TCN4-I_93	1014	34705	35719	4	2	6	0	0	0	3	4	7	4	2	6
Cnl1_806	1	0	1	11	5	16	13	2	15	5	0	5	7	4	11
TCN4-I_92	1121	36476	37597	4	2	6	0	0	0	3	4	7	4	2	6
Cnl1_805	0	0	0	1	17	18	4	18	22	3	14	17	19	14	33
TCN4-I_91	68	979	1047	0	2	2	0	1	1	3	5	8	0	2	2
Cnl1_804	1	116	117	12	567	579	12	6	18	11	130	141	7	93	100
Cnl1_803	14	175	189	16307	539	16846	0	0	0	266725	1051640	1318365	264035	1381581	1645616
Cnl1_802	0	9	9	8013	288	8301	0	0	0	38669	531007	569676	32846	230262	263108
Cnl1_801	1	40	41	10294	319	10613	0	0	0	58961	548148	607109	73010	223428	296438
Zisupton-2_PGr_541	0	0	0	1	0	1	1	0	1	0	0	0	2	0	2
TCN10-LTR_870	0	0	0	2	1	3	0	1	1	0	0	0	1	1	2
TCN2-LTR_1151	0	0	0	0	1	1	0	0	0	0	0	0	1	1	2
TCN2-LTR_1150	1	1	2	1	0	1	0	1	1	1	1	2	3	0	3
HARBINGER1_CN_587	0	1	1	0	0	0	0	0	0	0	1	1	0	0	0
TCN3-I_1086	2	3	5	11	8	19	20	12	32	24	7	31	18	4	22
TCN760_1102	0	1	1	0	0	0	0	0	0	0	0	0	0	0	0
TCN760_1101	3	0	3	21	2	23	0	1	1	6	0	6	9	0	9
TCN10-LTR_869	0	0	0	0	0	0	0	0	0	0	0	0	0	0	0
TCN10-LTR_868	0	0	0	0	0	0	0	0	0	0	0	0	0	0	0
TCN5-LTR_527	0	0	0	2	1	3	0	2	2	0	0	0	0	0	0
TCN5-LTR_526	0	0	0	3	0	3	1	1	2	1	0	1	0	0	0
LTR11_CN_594	0	0	0	2	0	2	0	0	0	0	0	0	1	0	1
LTR11_CN_593	0	0	0	0	22	22	0	11	11	0	5	5	0	0	0
LTR11_CN_592	1	0	1	0	0	0	0	0	0	0	1	1	0	0	0
LTR11_CN_591	10	0	10	1	2	3	2	4	6	0	1	1	0	0	0
LTR11_CN_590	0	0	0	0	1	1	0	3	3	0	0	0	0	0	0
LTR11_CN_589	0	0	0	3	0	3	2	0	2	1	0	1	1	0	1
LTR12_CN_1241	0	0	0	0	1	1	0	2	2	0	1	1	0	0	0
TCN4-LTR_710	0	0	0	4	0	4	6	0	6	4	0	4	2	0	2
TCN10-LTR_1320	0	0	0	1	0	1	1	0	1	0	0	0	1	0	1
SSU-rRNA_Sce_192	0	0	0	0	0	0	0	0	0	0	0	0	0	0	0
SSU-rRNA_Sce_191	0	0	0	0	0	0	0	0	0	0	0	0	0	0	0
TCN3-LTR_903	0	1	1	0	0	0	0	0	0	0	0	0	1	0	1
SSU-rRNA_Sce_190	1	3	4	17	10	27	18	6	24	9	10	19	2	16	18
TCN10-LTR_1319	2	0	2	0	3	3	2	2	4	0	0	0	0	0	0
TCN3-LTR_902	0	0	0	0	0	0	0	1	1	0	0	0	0	0	0
TCN3-LTR_901	0	2	2	0	0	0	0	1	1	1	0	1	0	0	0
TCN3-LTR_900	2	1	3	9	0	9	9	0	9	3	0	3	2	0	2
TCN10-LTR_69	12	1	13	5	1	6	1	0	1	1	0	1	1	0	1
TCN10-LTR_68	4	2	6	4	1	5	0	0	0	1	0	1	1	0	1
TCN10-LTR_67	12	0	12	8	0	8	0	0	0	0	0	0	0	1	1
Gypsy-3_PCR-I_465	0	0	0	0	0	0	0	1	1	0	1	1	0	1	1
Gypsy-1_TMe-I_347	0	0	0	0	1	1	0	0	0	0	0	0	0	0	0
SSU-rRNA_Sce_189	1	0	1	2	6	8	3	5	8	1	4	5	0	4	4
SSU-rRNA_Sce_188	1	4	5	1	5	6	0	6	6	0	4	4	1	9	10
SSU-rRNA_Sce_187	9	68	77	20	1317	1337	24	3	27	20	213	233	13	180	193
SSU-rRNA_Sce_186	4	2	6	9	2	11	6	1	7	3	44	47	0	35	35
SSU-rRNA_Sce_185	4	0	4	20	1	21	32	2	34	11	0	11	7	2	9
SSU-rRNA_Sce_184	53	5	58	2	3	5	5	2	7	5	1	6	4	0	4
SSU-rRNA_Sce_183	1	1	2	1	16	17	4	18	22	0	13	13	0	4	4
SSU-rRNA_Sce_182	2	2	4	8	2	10	8	4	12	4	1	5	5	0	5
TCN1-I_1142	1	0	1	5	0	5	3	0	3	3	0	3	1	0	1
TCN6-I_242	0	0	0	0	0	0	0	0	0	0	0	0	0	0	0
TCN1-I_1141	0	0	0	5	0	5	2	0	2	2	0	2	3	0	3
TCN6-I_241	0	0	0	1	1	2	0	0	0	0	0	0	0	0	0
TCN6-I_240	3	6	9	19	35	54	23	29	52	24	13	37	25	12	37
TCN5-I_1010	1	0	1	1	0	1	1	0	1	0	0	0	0	0	0
TCN3-LTR_1161	0	0	0	3	0	3	2	0	2	1	2	3	0	0	0
TCN3-LTR_1160	2	0	2	2	0	2	2	0	2	3	0	3	2	0	2
TCN6-I_239	5	9	14	9	27	36	10	15	25	1	9	10	1	12	13
TCN6-I_238	0	0	0	2	0	2	2	0	2	1	0	1	0	0	0
TCN6-I_237	0	0	0	0	0	0	1	0	1	0	1	1	1	0	1
TCN3-LTR_1159	0	1	1	0	4	4	0	2	2	0	2	2	0	2	2
TCN3-LTR_1158	3	0	3	2	2	4	0	0	0	14	22	36	57	83	140
TCN3-LTR_1157	0	13	13	0	58	58	0	81	81	0	28	28	0	24	24
TCN760_306	0	0	0	5	0	5	0	0	0	0	0	0	0	0	0
TCN760_305	0	0	0	0	0	0	0	0	0	0	0	0	1	0	1
TCN6-LTR_635	0	0	0	6	0	6	8	0	8	1	0	1	1	0	1
TCN6-LTR_634	1	0	1	3	0	3	0	0	0	0	0	0	0	0	0
TCN6-LTR_633	1	0	1	3	0	3	6	0	6	3	0	3	1	0	1
Copia-6_Trm-I_1135	0	1	1	5	0	5	2	1	3	4	0	4	4	2	6
Gypsy-1_Trm-I_1053	0	0	0	0	0	0	0	0	0	0	0	0	0	0	0
TCN3-I_1005	0	1	1	1	4	5	2	6	8	0	3	3	0	2	2
CACTA-1_Ccinerea_397	0	0	0	0	0	0	0	0	0	0	0	0	0	0	0
TCN3-I_1004	1	3	4	2	0	2	0	2	2	4	2	6	4	1	5
TCN3-I_1003	0	0	0	0	0	0	0	0	0	0	0	0	0	0	0
Copia-58_BG-I_1047	0	0	0	0	1	1	0	0	0	0	1	1	0	0	0
TCN3-I_1002	0	1	1	5	3	8	1	3	4	1	1	2	2	1	3
TCN3-I_1001	72	23	95	63	12	75	76	3	79	267	0	267	267	4	271
TCN1-LTR_290	0	0	0	0	0	0	0	0	0	0	0	0	0	0	0
TCN760_639	4	2	6	13	1	14	28	1	29	36	1	37	31	1	32
TCN760_638	0	0	0	0	0	0	0	0	0	0	0	0	0	0	0
TCN760_637	0	0	0	0	0	0	0	0	0	0	0	0	0	0	0
TCN760_636	0	0	0	2	0	2	0	0	0	1	0	1	1	0	1
TCN1-LTR_289	0	0	0	1	0	1	0	0	0	0	0	0	1	0	1
TCN1-LTR_288	2	0	2	3	0	3	0	0	0	8	0	8	5	0	5
TCN1-LTR_287	0	0	0	7	2	9	3	2	5	8	0	8	7	0	7
TCN1-LTR_286	0	1	1	0	0	0	1	0	1	0	0	0	0	0	0
TCN1-LTR_285	0	0	0	0	0	0	0	0	0	0	0	0	0	0	0
TCN1-LTR_284	0	1	1	5	7	12	6	6	12	1	3	4	5	3	8
TCN3-I_1340	0	0	0	0	0	0	0	0	0	0	0	0	0	0	0
TCN1-LTR_283	0	0	0	1	0	1	0	0	0	0	0	0	0	0	0
LTR11_CN_866	1	1	2	0	0	0	0	0	0	0	0	0	0	0	0
LTR11_CN_865	0	0	0	0	2	2	1	0	1	0	0	0	0	0	0
TCN3-I_1339	12	3	15	57	6	63	42	1	43	24	8	32	16	9	25
LTR11_CN_864	0	0	0	0	0	0	0	0	0	0	0	0	0	0	0
TCN3-I_1338	1866	0	1866	1	0	1	1	0	1	0	0	0	0	2	2
LTR11_CN_863	0	0	0	0	2	2	1	3	4	0	0	0	0	3	3
TCN3-I_1337	283	4	287	2219	13	2232	16	14	30	1543	26	1569	1239	16	1255
LTR11_CN_862	0	0	0	0	2	2	0	2	2	0	0	0	0	3	3
TCN3-I_1336	25	0	25	7	1	8	4	3	7	3	0	3	8	0	8
LTR11_CN_861	0	1	1	0	1	1	0	1	1	0	0	0	0	0	0
TCN3-I_1335	0	0	0	0	1	1	0	0	0	0	0	0	2	0	2
LTR11_CN_860	0	0	0	0	0	0	0	0	0	0	1	1	0	0	0
TCN5-I_109	1	0	1	2	2	4	0	0	0	1	1	2	3	1	4
TCN5-I_108	1950	1	1951	0	3	3	0	0	0	3	0	3	3	0	3
PCretro3_I-int_596	0	0	0	3	1	4	0	1	1	1	2	3	2	0	2
Cnl1_152	5	315	320	7	7	14	4	7	11	3	1	4	3	4	7
Cnl1_151	3	2	5	14	35	49	13	41	54	8	34	42	8	21	29
Cnl1_150	1	3	4	1	12	13	1	7	8	1	9	10	1	7	8
TCN4-LTR_1166	0	0	0	1	0	1	3	1	4	1	1	2	4	0	4
TCN4-LTR_1165	1	0	1	0	0	0	1	0	1	2	0	2	3	0	3
TCN4-LTR_1164	0	0	0	0	1	1	0	0	0	1	0	1	0	0	0
CT-rich_582	0	0	0	1	19	20	0	6	6	1	8	9	1	4	5
Cnl1_149	2	0	2	5	6	11	12	16	28	5	11	16	1	9	10
Cnl1_148	2	1	3	26	27	53	6	20	26	12	14	26	56	14	70
Cnl1_147	8	127	135	8	579	587	4	16	20	20	157	177	2	99	101
Cnl1_146	14	263	277	17462	619	18081	0	0	0	363380	1496893	1860273	332821	1963634	2296455
Cnl1_145	14	185	199	13734	493	14227	0	0	0	226166	883420	1109586	220420	1100453	1320873
Cnl1_144	14	177	191	13301	467	13768	0	0	0	218265	815076	1033341	213257	997248	1210505
Cnl1_143	14	153	167	11120	445	11565	1	0	1	194332	765864	960196	188861	951591	1140452
Cnl1_142	0	0	0	0	1	1	0	2	2	0	0	0	0	1	1
Cnl1_141	0	0	0	1	0	1	0	0	0	1	0	1	0	0	0
Cnl1_140	0	0	0	5	0	5	4	1	5	1	1	2	0	0	0
PIF_Harbinger-1_CryNeo_181	2	0	2	1	1	2	1	0	1	1	3	4	0	0	0
TCN3-LTR_299	0	0	0	1	0	1	0	0	0	0	0	0	0	0	0
TCN3-LTR_298	0	0	0	0	1	1	0	3	3	0	0	0	0	1	1
TCN3-LTR_297	1	0	1	0	0	0	0	0	0	0	0	0	0	0	0
Cnl1_139	0	0	0	1	1	2	1	0	1	0	1	1	0	1	1
Cnl1_138	7637	306341	313978	8	14	22	4	85	89	20	172	192	531	3754	4285
Cnl1_137	3	1	4	11	2	13	13	3	16	2	1	3	2	1	3
Cnl1_136	519	574	1093	3099	3299	6398	709	859	1568	1030	1070	2100	1010	1035	2045
Cnl1_135	0	0	0	719	32	751	0	0	0	1862	228540	230402	729	13548	14277
Cnl1_134	0	0	0	796	34	830	0	0	0	2380	245477	247857	912	15865	16777
Cnl1_133	1366	68952	70318	2	7	9	1	27	28	0	19	19	1	49	50
Cnl1_132	0	0	0	2	0	2	0	0	0	0	0	0	1	0	1
Cnl1_131	0	0	0	1	4	5	0	0	0	0	3	3	2	4	6
Cnl1_130	0	0	0	3	0	3	3	0	3	2	0	2	0	0	0
Cnl1_9	13	175	188	11032	379	11411	1	0	1	226862	1353885	1580747	213893	1282932	1496825
Cnl1_8	7	150	157	11285	348	11633	0	0	0	235567	1203967	1439534	224117	1244829	1468946
Cnl1_7	14	187	201	12367	426	12793	0	0	0	262935	1470004	1732939	247234	1438477	1685711
Cnl1_6	14	187	201	12292	426	12718	0	0	0	262451	1469817	1732268	246978	1442727	1689705
Cnl1_5	0	0	0	327	20	347	0	0	0	15	20	35	28	62	90
Cnl1_4	0	0	0	342	24	366	0	0	0	17	23	40	32	77	109
TCN3-I_375	0	0	0	1	0	1	1	0	1	0	0	0	0	0	0
Cnl1_3	0	0	0	337	25	362	0	0	0	18	23	41	35	83	118
TCN3-I_374	4	6	10	2	25	27	4	6	10	10	3	13	8	8	16
Cnl1_2	0	0	0	342	24	366	0	0	0	17	23	40	32	77	109
TCN3-I_373	0	1	1	0	0	0	0	0	0	0	0	0	0	0	0
Cnl1_1	0	0	0	569	43	612	0	0	0	87	33	120	167	95	262
TCN3-I_372	0	0	0	2	0	2	0	0	0	1	0	1	0	0	0
Copia-18_MLP-I_972	0	0	0	0	0	0	0	0	0	0	0	0	0	0	0
TCN3-I_371	3	4	7	15	14	29	19	5	24	7	7	14	8	9	17
TCN3-I_370	0	0	0	0	0	0	0	0	0	0	0	0	0	0	0
Cnl1_129	1	39	40	799	73	872	0	0	0	31549	147729	179278	32452	162410	194862
Cnl1_128	0	0	0	739	32	771	0	0	0	1691	219711	221402	677	12163	12840
Cnl1_127	2	0	2	1	0	1	0	2	2	3	1	4	1	0	1
Copia-8_ADe-I_1051	1	0	1	1	0	1	2	1	3	1	0	1	0	1	1
Copia-8_ADe-I_1050	0	3	3	0	7	7	2	5	7	0	3	3	0	1	1
TCN1-LTR_599	1	0	1	0	0	0	0	0	0	0	0	0	0	1	1
TCN1-LTR_598	0	0	0	1	0	1	0	0	0	0	0	0	0	0	0
TCN3-I_369	0	0	0	3	2	5	1	2	3	2	0	2	0	0	0
Copia-8_ADe-I_1049	0	0	0	0	1	1	0	0	0	0	0	0	0	0	0
Copia-8_ADe-I_1048	0	0	0	0	0	0	0	0	0	1	0	1	0	0	0
TCN6-I_1174	2	1	3	17	2	19	12	1	13	9	3	12	6	2	8
TCN6-I_1173	0	2	2	8	5	13	7	4	11	3	22	25	5	14	19
TCN6-I_1172	0	0	0	0	0	0	0	0	0	1	0	1	0	0	0
TCN2-I_367	1	0	1	3	7	10	2	7	9	1	2	3	1	2	3
Gypsy-62_BG-LTR_62	1	2	3	0	16	16	0	0	0	0	2	2	0	5	5
TCN4-I_788	1	3	4	0	3	3	0	2	2	0	2	2	0	0	0
Copia-7_PTrit-I_346	0	0	0	0	1	1	0	0	0	0	0	0	0	1	1
DNA3-3_MLP_584	0	0	0	0	0	0	0	0	0	0	1	1	0	0	0
TCN4-I_787	2	1	3	14	4	18	18	3	21	10	1	11	5	1	6
DNA3-3_MLP_583	0	0	0	0	4	4	0	6	6	0	7	7	0	1	1
TCN4-I_786	0	4	4	0	8	8	0	17	17	2	1	3	1	3	4
TCN4-I_785	49	5	54	97	28	125	107	35	142	152	9	161	103	8	111
TCN4-I_784	0	0	0	0	3	3	0	2	2	0	1	1	0	0	0
TCN4-I_783	1	0	1	0	1	1	0	2	2	0	1	1	0	1	1
Cnl1_463	2	6	8	14	15	29	14	26	40	8	18	26	9	11	20
Cnl1_462	11	3	14	78	21	99	54	11	65	29	16	45	40	14	54
Cnl1_461	2	2	4	55	3	58	35	2	37	12	1	13	10	0	10
Cnl1_460	2	2	4	24	33	57	13	13	26	48	7	55	30	6	36
LTR12_CN_356	0	0	0	5	0	5	1	1	2	0	0	0	0	0	0
LTR12_CN_355	0	0	0	0	1	1	0	0	0	0	0	0	0	1	1
TCN1-LTR_213	1	0	1	6	5	11	4	6	10	2	3	5	2	0	2
TCN1-LTR_212	2	0	2	1	0	1	0	0	0	0	0	0	1	0	1
TCN1-LTR_211	1	0	1	12	3	15	7	4	11	1	3	4	2	0	2
TCN1-LTR_210	1	0	1	0	0	0	0	1	1	1	1	2	0	0	0
TCN760_918	0	0	0	1	0	1	0	0	0	0	0	0	0	0	0
Cnl1_459	1	5	6	1	22	23	1	16	17	1	23	24	3	18	21
Cnl1_458	2	1	3	16	3	19	14	11	25	12	6	18	8	12	20
Cnl1_457	1	21	22	3	7	10	6	6	12	1	0	1	1	2	3
Cnl1_456	1	0	1	14	5	19	18	2	20	8	0	8	7	4	11
Cnl1_455	0	0	0	0	0	0	0	0	0	0	0	0	0	0	0
Cnl1_454	0	0	0	0	0	0	0	0	0	0	0	0	0	0	0
Cnl1_453	1	0	1	1	0	1	3	0	3	1	0	1	3	0	3
Cnl1_452	16	0	16	1	1	2	1	0	1	72	0	72	89	1	90
Cnl1_451	0	0	0	1	3	4	3	1	4	2	0	2	1	1	2
Cnl1_450	0	1	1	3	3	6	0	5	5	1	3	4	0	1	1
TCN1-LTR_209	0	0	0	0	1	1	0	0	0	4	0	4	1	0	1
TCN1-LTR_208	0	0	0	0	2	2	0	2	2	0	4	4	0	1	1
TCN1-LTR_207	1	0	1	1	8	9	4	0	4	20	6	26	10	10	20
TCN2-LTR_368	0	0	0	0	1	1	0	1	1	0	1	1	0	0	0
TCN1-LTR_206	0	0	0	0	0	0	0	1	1	0	0	0	0	0	0
Copia-58_BG-I_1306	0	0	0	0	0	0	1	0	1	0	0	0	0	0	0
PIF_Harbinger-1_CryNeo_492	0	0	0	0	1	1	0	0	0	0	3	3	0	0	0
TCN1-LTR_205	0	2	2	0	2	2	0	4	4	0	4	4	0	3	3
PIF_Harbinger-1_CryNeo_491	0	0	0	0	0	0	0	0	0	0	0	0	0	0	0
TCN1-LTR_204	0	0	0	0	0	0	0	2	2	0	1	1	0	0	0
PIF_Harbinger-1_CryNeo_490	3	88	91	14	1034	1048	12	87	99	8	639	647	9	603	612
TCN1-LTR_203	2	2	4	0	45	45	0	35	35	0	9	9	0	11	11
TCN1-LTR_202	0	0	0	0	0	0	0	0	0	0	0	0	0	0	0
TCN1-LTR_201	0	0	0	1	0	1	1	0	1	0	0	0	0	0	0
TCN1-LTR_200	1	1	2	2	1	3	0	3	3	46	6	52	8	3	11
Gypsy-5_PSH-I_976	0	0	0	0	0	0	1	0	1	0	0	0	0	0	0
TCN3-I_694	1	1	2	0	1	1	1	1	2	0	2	2	1	1	2
TCN3-I_693	0	1	1	1	3	4	0	5	5	0	2	2	1	0	1
TCN3-I_692	0	1	1	0	7	7	0	9	9	0	2	2	0	1	1
TCN1-I_359	0	0	0	0	0	0	0	0	0	0	0	0	0	0	0
TCN1-I_358	0	0	0	1	0	1	1	0	1	0	0	0	0	0	0
TCN1-I_357	6	5	11	16	6	22	5	1	6	5	4	9	9	5	14
Cnl1_449	0	0	0	1	0	1	0	0	0	0	0	0	0	1	1
Cnl1_448	0	0	0	0	1	1	0	0	0	0	0	0	0	1	1
Cnl1_447	0	5	5	1493	31	1524	0	0	0	32534	128270	160804	26987	156870	183857
Cnl1_446	0	0	0	0	0	0	3	1	4	0	3	3	0	2	2
Cnl1_445	0	2	2	0	3	3	0	2	2	0	3	3	0	4	4
Cnl1_1199	0	0	0	1	0	1	0	0	0	1	0	1	0	0	0
Cnl1_444	3	0	3	4	2	6	2	0	2	1	0	1	0	0	0
Cnl1_1198	0	8	8	0	0	0	0	0	0	0	0	0	0	0	0
Cnl1_443	0	0	0	0	0	0	1	1	2	1	0	1	1	0	1
Cnl1_1197	0	1	1	7	2	9	4	4	8	14	0	14	5	0	5
PIF_Harbinger-1_CryNeo_489	3	0	3	0	0	0	0	0	0	0	0	0	0	1	1
Cnl1_442	0	0	0	1	0	1	0	2	2	3	0	3	0	1	1
Cnl1_1196	1	4	5	1	5	6	4	3	7	1	3	4	1	3	4
PIF_Harbinger-1_CryNeo_488	0	0	0	0	0	0	0	0	0	1	0	1	0	0	0
Cnl1_441	1	0	1	0	1	1	1	0	1	0	0	0	0	1	1
Cnl1_1195	1	3	4	4	3	7	5	0	5	2	1	3	0	1	1
PIF_Harbinger-1_CryNeo_487	0	0	0	0	1	1	0	0	0	0	0	0	0	0	0
Cnl1_440	0	6	6	2	12	14	0	14	14	0	9	9	0	8	8
Cnl1_1194	69	12	81	58	6	64	66	0	66	264	0	264	262	0	262
Cnl1_1193	0	5	5	2	13	15	0	10	10	1	10	11	1	8	9
Cnl1_1192	7	0	7	9	0	9	10	2	12	8	1	9	6	3	9
Cnl1_1191	24	2	26	58	10	68	27	7	34	39	5	44	29	3	32
TCN1-LTR_74	2	0	2	0	0	0	0	0	0	2	0	2	0	0	0
Cnl1_1190	0	2	2	7	11	18	12	6	18	5	10	15	6	4	10
TCN1-LTR_73	497	28	525	21	10	31	0	0	0	13	1	14	10	2	12
TCN1-LTR_72	301	52	353	17	10	27	0	0	0	13	3	16	10	1	11
TCN1-LTR_71	701	55	756	15	13	28	1	0	1	9	5	14	6	4	10
CACTA-1_Ccinerea_640	0	0	0	0	0	0	0	0	0	0	0	0	0	0	0
TCN4-I_1163	1281	195	1476	29	232	261	12	7	19	4	44	48	33	46	79
TCN4-I_1162	0	0	0	0	1	1	0	0	0	0	0	0	0	0	0
Cnl1_439	0	0	0	2	1	3	2	0	2	0	1	1	0	0	0
Cnl1_438	4	0	4	9	2	11	1	4	5	3	1	4	0	0	0
Cnl1_437	1	1	2	2	4	6	3	1	4	2	0	2	1	0	1
Cnl1_436	0	0	0	3227	101	3328	0	0	0	3150	256841	259991	1865	20659	22524
Cnl1_435	3	1	4	0	3	3	0	6	6	0	1	1	1	0	1
Cnl1_1189	0	0	0	5	13	18	1	8	9	3	4	7	3	1	4
Cnl1_434	2	1	3	1	10	11	2	2	4	2	7	9	2	5	7
Cnl1_1188	2	9	11	5	29	34	2	42	44	9	6	15	4	17	21
Cnl1_433	7	2	9	32	4	36	17	1	18	5	4	9	1	3	4
Cnl1_1187	11	5	16	51	15	66	19	20	39	35	9	44	31	8	39
Cnl1_432	0	0	0	0	11	11	0	5	5	0	1	1	0	0	0
Cnl1_1186	4	1	5	7	2	9	5	7	12	2	1	3	7	3	10
Cnl1_431	0	1	1	0	0	0	0	1	1	0	2	2	0	0	0
Cnl1_1185	2	1	3	8	2	10	6	1	7	7	2	9	5	2	7
Cnl1_430	0	5	5	5	4	9	1	5	6	3	8	11	4	10	14
Cnl1_1184	2	43	45	8703	328	9031	0	0	0	68935	526610	595545	80253	238806	319059
Cnl1_1183	0	0	0	3	0	3	1	0	1	0	0	0	0	0	0
Cnl1_1182	1	1	2	3510	42	3552	0	0	0	30236	33596	63832	41802	39480	81282
Cnl1_1181	0	0	0	0	0	0	0	1	1	1	2	3	0	3	3
Cnl1_1180	0	2	2	656	37	693	0	0	0	8122	134708	142830	6203	198828	205031
TCN1-LTR_1084	0	10	10	1	18	19	0	28	28	0	23	23	1	27	28
TCN1-LTR_1083	0	0	0	0	3	3	3	6	9	0	3	3	0	1	1
TCN1-LTR_1082	42	4	46	32	14	46	16	7	23	52	1	53	113	3	116
TCN1-LTR_1081	4	0	4	3	4	7	8	1	9	24	0	24	15	2	17
TCN3-LTR_225	0	0	0	0	9	9	0	1	1	0	0	0	0	0	0
TCN1-LTR_1080	0	48	48	0	41	41	0	27	27	0	23	23	0	19	19
TCN2-I_688	3	10	13	6	1	7	14	0	14	3	0	3	7	1	8
TCN3-LTR_224	1	0	1	1	0	1	3	0	3	1	0	1	0	0	0
TCN2-I_687	0	0	0	0	0	0	0	1	1	0	1	1	0	2	2
TCN3-LTR_223	1	0	1	4	0	4	5	0	5	1	0	1	0	0	0
Copia-6_Trm-I_60	0	0	0	51	0	51	46	1	47	9	0	9	9	1	10
TCN2-I_686	0	4	4	1	2	3	0	5	5	1	0	1	0	0	0
TCN3-LTR_222	0	0	0	0	7	7	0	1	1	0	1	1	0	0	0
TCN2-I_685	6	0	6	15	4	19	11	0	11	10	1	11	7	1	8
TCN3-LTR_221	2	3	5	0	0	0	1	0	1	1	0	1	0	0	0
TCN2-I_684	0	0	0	0	0	0	3	0	3	1	0	1	1	0	1
TCN3-LTR_220	0	1	1	0	0	0	0	1	1	0	1	1	0	3	3
Cnl1_429	4	1	5	31	0	31	44	4	48	10	1	11	8	0	8
Cnl1_428	0	1	1	0	3	3	0	2	2	0	3	3	0	1	1
Cnl1_427	1	0	1	0	1	1	4	0	4	1	0	1	2	0	2
Cnl1_426	1	0	1	0	0	0	0	1	1	0	3	3	0	0	0
Cnl1_425	0	0	0	0	0	0	0	0	0	0	0	0	0	1	1
Cnl1_1179	0	0	0	3	0	3	0	0	0	1	0	1	1	0	1
Cnl1_424	0	0	0	0	2	2	0	2	2	0	0	0	0	1	1
Cnl1_1178	1	2	3	3589	51	3640	0	0	0	39016	46663	85679	51929	51733	103662
Cnl1_423	0	0	0	0	0	0	0	0	0	0	0	0	0	0	0
Cnl1_422	0	0	0	5	11	16	1	0	1	0	186	186	0	344	344
Cnl1_421	0	0	0	0	3	3	0	3	3	0	0	0	0	0	0
Cnl1_420	4	1	5	0	0	0	1	1	2	1	0	1	1	3	4
Helitron-1_AN_160	8	0	8	0	0	0	0	0	0	0	0	0	0	0	0
LTR12_CN_678	0	0	0	0	0	0	0	0	0	0	0	0	0	0	0
LTR12_CN_677	0	0	0	0	0	0	0	0	0	0	0	0	1	0	1
Copia-4_ADe-I_664	0	0	0	0	0	0	0	0	0	0	0	0	0	0	0
TCN1-LTR_1079	0	0	0	0	4	4	0	6	6	0	1	1	0	1	1
LTR12_CN_676	0	1	1	2	1	3	3	1	4	1	0	1	0	0	0
Copia-6_Trm-I_59	0	0	0	8	0	8	4	0	4	0	0	0	2	0	2
Copia-6_Trm-I_58	0	0	0	46	0	46	40	0	40	16	2	18	13	8	21
TCN2-LTR_691	6	0	6	10	0	10	11	0	11	7	1	8	5	0	5
TCN2-LTR_690	0	67	67	1	54	55	0	55	55	0	261	261	0	258	258
Harbinger-4D_PSt_1056	0	2	2	1	0	1	1	0	1	1	6	7	1	0	1
Cnl1_419	0	0	0	1	0	1	1	0	1	1	1	2	0	0	0
Cnl1_418	0	1	1	1	1	2	0	0	0	0	0	0	0	0	0
Cnl1_417	0	1	1	1157	42	1199	0	0	0	32274	96846	129120	26103	129193	155296
Cnl1_416	0	0	0	637	4	641	0	0	0	96	317	413	130	380	510
Cnl1_415	0	1	1	364	28	392	0	0	0	6656	86576	93232	4948	122186	127134
Cnl1_414	9	2	11	65	0	65	43	0	43	14	1	15	20	1	21
Cnl1_413	5	4	9	106	8	114	86	5	91	17	2	19	18	1	19
Cnl1_412	1	3	4	11	15	26	7	12	19	3	6	9	8	2	10
Cnl1_411	0	3	3	5	6	11	3	8	11	1	1	2	0	1	1
TCN1-I_680	0	0	0	1	0	1	5	0	5	0	0	0	1	0	1
Cnl1_410	1300	36805	38105	55	13	68	23	7	30	881	14527	15408	1083	23990	25073
TCN10-LTR_499	3	0	3	2	0	2	0	0	0	0	0	0	0	0	0
TCN10-LTR_498	0	3	3	2	5	7	8	2	10	5	4	9	2	2	4
TCN2-LTR_689	0	5	5	0	3	3	0	7	7	0	3	3	0	3	3
TCN10-LTR_497	0	0	0	0	0	0	0	2	2	0	0	0	0	0	0
TCN10-LTR_496	0	9	9	8	0	8	0	0	0	2	1	3	0	0	0
TCN10-LTR_495	2	0	2	33	2	35	4	0	4	0	0	0	0	0	0
TCN10-LTR_494	1	0	1	2	0	2	0	0	0	0	0	0	0	0	0
MuDRF-3_MLP_486	0	0	0	57	0	57	47	0	47	6	0	6	10	0	10
TCN1-LTR_880	1	0	1	5	0	5	1	0	1	1	0	1	0	0	0
hAT-9_PGr_1311	0	1	1	1	0	1	0	0	0	1	0	1	0	0	0
hAT-9_PGr_1310	0	0	0	1	0	1	0	0	0	1	0	1	0	0	0
Cnl1_409	1	1	2	2	47	49	1	45	46	5	17	22	2	7	9
Cnl1_408	1	0	1	12	34	46	3	23	26	6	18	24	53	20	73
Cnl1_407	1	116	117	12	572	584	10	9	19	8	131	139	5	96	101
Cnl1_406	13	175	188	15725	533	16258	0	0	0	253921	1047768	1301689	245834	1377545	1623379
Cnl1_405	14	189	203	12137	474	12611	0	0	0	236988	1064246	1301234	227544	1388755	1616299
Cnl1_404	14	181	195	11973	452	12425	0	0	0	228973	989879	1218852	220343	1278345	1498688
Cnl1_403	2	43	45	8675	329	9004	0	0	0	67560	532625	600185	78854	239996	318850
Cnl1_402	0	0	0	0	0	0	0	0	0	0	0	0	0	0	0
Cnl1_401	0	1	1	0	0	0	0	3	3	0	1	1	0	0	0
Cnl1_400	2	0	2	6	0	6	7	0	7	4	0	4	3	0	3
TCN1-LTR_879	6	0	6	10	0	10	0	0	0	0	0	0	1	0	1
TCN1-LTR_878	0	1	1	0	1	1	1	2	3	0	1	1	1	3	4
TCN1-LTR_877	0	0	0	0	0	0	0	0	0	0	0	0	0	0	0
TCN1-LTR_876	0	0	0	1	1	2	0	1	1	1	0	1	0	0	0
TCN1-LTR_875	0	0	0	0	5	5	0	5	5	0	2	2	0	2	2
TCN1-LTR_874	0	0	0	1	0	1	0	0	0	0	0	0	0	0	0
TCN1-LTR_873	0	0	0	0	0	0	0	0	0	0	0	0	0	0	0
TCN1-LTR_510	2	1	3	3	0	3	4	0	4	1	0	1	1	0	1
TCA5_I-int_867	0	0	0	0	1	1	0	2	2	0	0	0	0	0	0
TCN1-LTR_509	0	0	0	1	0	1	2	1	3	2	0	2	2	0	2
TCN1-LTR_508	0	0	0	3	1	4	1	1	2	2	0	2	0	0	0
TCN1-LTR_507	0	0	0	0	0	0	0	0	0	0	0	0	0	1	1
TCN1-LTR_506	0	0	0	0	6	6	0	2	2	0	4	4	0	3	3
TCN1-LTR_505	0	4	4	2	13	15	0	8	8	0	3	3	0	4	4
Mariner-2_SLL_180	0	0	0	0	0	0	0	0	0	0	0	0	0	0	0
TCN1-LTR_504	0	9	9	3	92	95	1	62	63	0	24	24	0	22	22
TCN1-LTR_503	0	2	2	1	15	16	0	13	13	0	4	4	0	3	3
TCN1-LTR_502	0	0	0	1	1	2	1	0	1	1	0	1	0	0	0
TCN1-LTR_501	3	2	5	2	2	4	0	1	1	2	1	3	1	3	4
TCN4-I_709	0	0	0	0	2	2	0	3	3	1	0	1	0	4	4
TCN4-I_708	0	0	0	2	9	11	4	9	13	1	10	11	2	11	13
HARBINGER1_CN_1236	0	0	0	0	0	0	0	1	1	0	2	2	0	0	0
HARBINGER1_CN_1235	0	1	1	0	0	0	0	2	2	0	0	0	1	0	1
HARBINGER1_CN_1234	0	0	0	0	2	2	0	3	3	0	1	1	0	1	1
Cnl1_748	1	64	65	7	217	224	2	4	6	3	283	286	0	222	222
Cnl1_747	2	117	119	17	568	585	13	7	20	12	130	142	8	93	101
Cnl1_746	1	4	5	5	18	23	2	22	24	2	8	10	4	7	11
Cnl1_745	2	1	3	12	4	16	17	8	25	16	5	21	4	7	11
Cnl1_744	2	5	7	20	8	28	15	7	22	6	10	16	9	13	22
Mariner-2_SLL_179	0	0	0	0	0	0	0	0	0	0	0	0	0	0	0
Cnl1_743	1	1	2	2	9	11	1	3	4	1	9	10	1	7	8
Cnl1_742	5	4	9	8	19	27	2	14	16	0	12	12	2	14	16
Cnl1_741	4	0	4	19	2	21	10	2	12	9	3	12	5	4	9
Cnl1_1133	12	1	13	30	4	34	36	1	37	20	18	38	18	4	22
Cnl1_740	1	0	1	1	20	21	4	27	31	3	20	23	20	18	38
Cnl1_1132	1	2	3	4	2	6	2	1	3	2	1	3	2	6	8
Cnl1_1131	658	16	674	4710	24	4734	4583	18	4601	1836	8	1844	1630	7	1637
Cnl1_1130	317	8	325	322	24	346	223	3	226	588	7	595	582	4	586
TCN5-LTR_1100	0	0	0	0	0	0	2	0	2	0	1	1	0	0	0
TCN3-LTR_899	0	1	1	0	0	0	0	0	0	0	0	0	0	0	0
TCN3-LTR_898	0	0	0	0	1	1	0	0	0	0	0	0	0	0	0
TCN1-I_70	314	0	314	0	0	0	0	0	0	1	0	1	2	0	2
Helitron-1_SLL_161	0	0	0	3	0	3	4	1	5	2	0	2	1	0	1
TCN2-I_995	5	0	5	9	0	9	11	0	11	6	1	7	4	0	4
LTR11_CN_1062	0	0	0	2	0	2	0	0	0	0	0	0	0	1	1
TCN2-I_994	1	0	1	8	0	8	10	1	11	2	0	2	1	0	1
LTR11_CN_1061	0	0	0	0	2	2	0	0	0	0	0	0	0	0	0
TCN2-I_993	0	0	0	2	0	2	0	0	0	0	0	0	0	0	0
Cnl1_739	19	108	127	6372	226	6598	1	11	12	117735	337435	455170	130722	372201	502923
LTR11_CN_1060	0	0	0	0	0	0	0	0	0	0	0	0	0	0	0
TCN2-I_992	0	0	0	0	0	0	0	0	0	0	0	0	0	0	0
Cnl1_738	13	187	200	16861	616	17477	0	0	0	319940	1669463	1989403	295818	2002154	2297972
TCN2-I_991	12	0	12	8	2	10	14	1	15	7	1	8	6	0	6
Cnl1_737	14	194	208	14772	546	15318	0	0	0	264859	1318866	1583725	251233	1459853	1711086
Cnl1_1129	1	4	5	11	107	118	6	44	50	1	8	9	0	9	9
TCN2-I_990	9	1	10	19	5	24	14	4	18	12	2	14	9	3	12
Cnl1_736	14	186	200	14436	531	14967	0	0	0	258111	1409574	1667685	244731	1363111	1607842
Cnl1_1128	1	2	3	5	4	9	1	0	1	0	2	2	1	2	3
Cnl1_735	3	2	5	8	10	18	8	9	17	15	5	20	10	6	16
Cnl1_1127	1	0	1	5	13	18	5	22	27	4	17	21	3	15	18
Cnl1_734	0	0	0	0	2	2	0	2	2	0	0	0	0	0	0
Cnl1_1126	2	1	3	33	22	55	14	15	29	16	8	24	46	11	57
Cnl1_733	0	0	0	0	0	0	0	0	0	0	0	0	0	0	0
Cnl1_1125	9	53	62	5877	203	6080	1	11	12	77583	240053	317636	94272	264623	358895
Cnl1_732	0	0	0	0	0	0	2	2	4	0	1	1	0	0	0
Cnl1_1124	13	186	199	16353	610	16963	0	0	0	292604	1768990	2061594	272864	1900734	2173598
Cnl1_731	1	0	1	3	1	4	1	0	1	0	0	0	0	1	1
Cnl1_1123	14	194	208	14742	548	15290	0	0	0	266252	1498112	1764364	251678	1467083	1718761
Cnl1_730	0	1	1	3	3	6	2	1	3	3	1	4	1	0	1
Cnl1_1122	14	186	200	14470	529	14999	0	0	0	258292	1416183	1674475	244784	1363222	1608006
LSU-rRNA_Sce_174	0	0	0	0	2	2	0	1	1	0	0	0	0	0	0
Cnl1_1121	0	1	1	8	0	8	0	3	3	0	1	1	0	0	0
LSU-rRNA_Sce_173	0	1	1	0	1	1	0	1	1	0	0	0	0	0	0
Cnl1_1120	31	12	43	99	2	101	3	1	4	89	0	89	59	3	62
LSU-rRNA_Sce_172	0	0	0	1	0	1	1	0	1	1	0	1	0	0	0
LSU-rRNA_Sce_171	802	1666	2468	72	19	91	3	2	5	169	8	177	124	43	167
LSU-rRNA_Sce_170	13	1051	1064	9	10454	10463	12	451	463	6	3801	3807	9	3025	3034
LTR12_CN_983	0	0	0	0	0	0	0	0	0	0	0	0	0	0	0
LTR12_CN_982	0	0	0	2	0	2	0	0	0	1	0	1	1	0	1
TCN3-I_616	7	17	24	9	11	20	22	7	29	11	12	23	17	3	20
TCN3-I_615	0	0	0	2	1	3	1	1	2	0	0	0	1	0	1
LTR11_CN_1059	0	7	7	0	14	14	0	18	18	0	17	17	0	13	13
TCN3-I_614	0	0	0	1	3	4	0	5	5	0	2	2	0	0	0
LTR11_CN_1058	0	8	8	0	11	11	0	20	20	0	22	22	0	13	13
TCN3-I_613	8	68	76	1	56	57	0	61	61	0	263	263	0	259	259
LTR11_CN_1057	0	0	0	0	0	0	0	0	0	1	0	1	0	0	0
TCN2-I_989	1	8	9	3	22	25	4	16	20	1	22	23	2	15	17
TCN3-LTR_520	1	1	2	0	5	5	0	4	4	0	1	1	0	0	0
Cnl1_729	0	2	2	1	15	16	0	1	1	1	3	4	1	9	10
Cnl1_728	1	1	2	1	10	11	2	12	14	0	4	4	0	1	1
Cnl1_727	14	6	20	1	16	17	1	3	4	0	1	1	0	2	2
Cnl1_1119	0	1	1	0	25	25	0	2	2	0	0	0	0	0	0
Cnl1_726	14	154	168	9703	398	10101	1	0	1	194709	796432	991141	189043	1002800	1191843
Cnl1_1118	0	0	0	4	10	14	4	20	24	0	12	12	1	7	8
Cnl1_725	0	0	0	0	0	0	1	0	1	0	0	0	0	0	0
Cnl1_1117	0	0	0	0	2	2	0	2	2	0	0	0	0	0	0
Cnl1_724	0	0	0	665	10	675	0	0	0	109	812	921	109	795	904
LSU-rRNA_Sce_169	11	5	16	7	20	27	10	13	23	9	5	14	5	6	11
Cnl1_1116	0	2	2	4	9	13	3	7	10	1	1	2	0	3	3
Cnl1_723	0	0	0	1	0	1	3	0	3	0	0	0	0	0	0
LSU-rRNA_Sce_168	2	2	4	2	58	60	9	40	49	5	18	23	6	19	25
Cnl1_1115	7	0	7	32	3	35	21	4	25	11	1	12	11	2	13
Cnl1_722	0	0	0	606	16	622	0	0	0	96	1645	1741	86	1231	1317
LSU-rRNA_Sce_167	11	14	25	56	9	65	34	8	42	30	1	31	9	1	10
Cnl1_1114	1	2	3	1	10	11	0	13	13	0	5	5	2	4	6
Cnl1_721	0	0	0	0	3	3	0	1	1	0	1	1	1	1	2
LSU-rRNA_Sce_166	8	1	9	10	4	14	14	15	29	11	0	11	8	4	12
Cnl1_1113	1	0	1	13	5	18	15	2	17	5	1	6	8	5	13
Cnl1_720	0	0	0	0	0	0	0	0	0	0	0	0	0	0	0
LSU-rRNA_Sce_165	435	3	438	8	8	16	7	3	10	4	4	8	8	0	8
Cnl1_1112	14	154	168	9792	419	10211	1	0	1	197701	855631	1053332	191373	1084655	1276028
LSU-rRNA_Sce_164	4	4	8	11	10	21	3	12	15	13	6	19	4	2	6
Cnl1_1111	0	0	0	1	0	1	0	0	0	0	2	2	0	1	1
LSU-rRNA_Sce_163	3	12	15	17	1	18	6	2	8	7	41	48	3	65	68
Cnl1_1110	1	0	1	0	0	0	2	0	2	0	1	1	2	0	2
LSU-rRNA_Sce_162	2	7	9	3	57	60	5	23	28	1	18	19	1	17	18
TCN2-LTR_999	1	0	1	3	1	4	5	0	5	2	0	2	0	1	1
TCN2-LTR_998	3	6	9	4	8	12	7	5	12	8	10	18	9	1	10
TCN2-LTR_997	0	0	0	4	0	4	5	0	5	4	0	4	2	0	2
TCN2-LTR_1085	0	0	0	0	1	1	0	1	1	0	0	0	0	0	0
TCN2-LTR_996	0	0	0	0	0	0	0	3	3	1	3	4	0	3	3
TCN3-LTR_519	0	1	1	5	2	7	0	1	1	2	1	3	0	1	1
TCN3-LTR_518	0	0	0	6	1	7	2	1	3	2	0	2	0	0	0
TCN5-LTR_111	0	0	0	0	0	0	0	0	0	0	0	0	0	1	1
TCN5-LTR_110	0	15	15	1	0	1	0	0	0	1	0	1	2	1	3
Cnl1_719	1	0	1	1	1	2	0	2	2	0	0	0	0	1	1
Cnl1_718	0	1	1	3	0	3	2	2	4	1	0	1	0	0	0
Cnl1_717	0	0	0	5	2	7	1	2	3	3	0	3	5	0	5
Cnl1_1109	0	0	0	0	0	0	0	0	0	0	0	0	0	0	0
Cnl1_716	0	0	0	597	13	610	0	0	0	96	1461	1557	86	1116	1202
Cnl1_1108	0	12	12	1496	25	1521	0	0	0	31578	78668	110246	25387	96748	122135
Cnl1_715	0	0	0	0	9	9	0	3	3	0	3	3	1	3	4
Cnl1_1107	0	0	0	611	6	617	0	0	0	107	451	558	114	477	591
Cnl1_1106	0	0	0	702	5	707	0	0	0	125	432	557	134	463	597
Cnl1_1105	0	0	0	0	3	3	0	2	2	0	2	2	2	1	3
Cnl1_1104	0	1	1	0	2	2	0	4	4	0	1	1	1	2	3
Cnl1_1103	0	0	0	687	6	693	0	0	0	129	468	597	153	515	668
TCN2-I_608	0	0	0	1	1	2	0	0	0	1	0	1	1	0	1
TCN2-I_607	0	0	0	2	0	2	4	0	4	1	0	1	0	0	0
TCN2-I_606	28	26	54	123	59	182	19	31	50	38	37	75	27	29	56
LTR11_CN_178	0	0	0	3	0	3	4	0	4	0	0	0	1	0	1
LTR11_CN_177	0	0	0	0	3	3	0	6	6	0	2	2	0	0	0
LTR11_CN_176	0	17	17	0	98	98	1	81	82	1	35	36	0	28	28
LTR11_CN_175	0	0	0	0	0	0	0	0	0	0	0	0	0	0	0
Harbinger-7_PGr_159	0	0	0	0	0	0	0	0	0	0	0	0	0	0	0
Gypsy-14_ADe-I_156	0	0	0	0	3	3	0	0	0	0	2	2	0	1	1
TCN2-LTR_612	2	0	2	0	0	0	0	0	0	0	0	0	0	0	0
TCN2-LTR_611	2	0	2	2	1	3	0	3	3	0	1	1	2	0	2
TCN2-LTR_610	1	0	1	4	0	4	6	0	6	0	1	1	5	0	5
TCN760_1017	1	0	1	1	0	1	8	0	8	0	0	0	0	0	0
TCN760_1016	0	0	0	0	0	0	0	0	0	0	0	0	1	0	1
TCN760_1015	0	0	0	0	0	0	1	0	1	0	0	0	0	0	0
TCN760_1014	0	1	1	1	0	1	0	0	0	0	0	0	0	0	0
TCN2-LTR_609	0	0	0	0	1	1	1	2	3	0	2	2	1	1	2
Copia-55_MLP-I_274	0	0	0	1	0	1	0	0	0	0	0	0	0	0	0
TCN6-LTR_247	0	0	0	0	7	7	0	1	1	0	0	0	0	0	0
TCN6-LTR_246	0	0	0	0	0	0	0	0	0	0	0	0	0	0	0
TCN6-LTR_245	0	0	0	0	0	0	0	0	0	0	0	0	0	0	0
TCN6-LTR_244	0	0	0	1	0	1	1	0	1	0	0	0	0	0	0
TCN6-LTR_243	0	0	0	1	0	1	3	0	3	0	0	0	0	1	1
PIF_Harbinger-1_TreMes_493	0	0	0	0	1	1	0	0	0	0	0	0	0	0	0
FoHeli2_1_1307	0	0	0	0	0	0	0	1	1	0	0	0	0	0	0
TCN10-LTR_757	0	0	0	0	0	0	0	0	0	0	0	0	0	0	0
TCN1-LTR_1327	0	0	0	2	4	6	1	0	1	1	0	1	0	0	0
Ginger2-1_MG_1232	0	0	0	0	1	1	0	0	0	0	0	0	0	0	0
TCN1-LTR_1326	0	0	0	0	0	0	0	1	1	0	1	1	0	1	1
TCN1-LTR_1325	4	2	6	31	2	33	15	3	18	8	2	10	8	3	11
TCN1-LTR_1324	0	4	4	0	10	10	0	3	3	0	8	8	0	7	7
TCN1-LTR_1323	0	0	0	0	0	0	0	3	3	0	1	1	0	1	1
TCN1-I_1078	0	0	0	0	1	1	0	0	0	0	2	2	0	0	0
TCN1-I_1077	0	0	0	0	1	1	0	1	1	0	0	0	0	0	0
TCN1-I_1076	0	0	0	0	0	0	0	1	1	0	0	0	0	0	0
TCN1-I_1075	2	1	3	19	1	20	27	0	27	12	0	12	19	1	20
TCN760_250	0	0	0	1	0	1	1	0	1	4	1	5	0	2	2
TCN4-LTR_625	3	0	3	2	0	2	0	0	0	0	0	0	2	0	2
TCN1-I_1074	1	1	2	1	0	1	0	2	2	0	0	0	0	0	0
TCN4-LTR_624	1	0	1	0	1	1	0	0	0	0	5	5	0	0	0
TCN1-I_1073	0	1	1	2	0	2	2	0	2	1	1	2	0	1	1
TCN4-LTR_623	0	1	1	1	10	11	1	11	12	0	11	11	0	12	12
HARBINGER1_CN_467	7	102	109	27	761	788	27	714	741	14	333	347	9	262	271
TCN760_249	0	1	1	0	0	0	0	0	0	1	3	4	2	0	2
TCN760_248	0	0	0	0	0	0	0	0	0	0	0	0	0	0	0
TCN3-LTR_1091	0	0	0	1	0	1	5	0	5	10	0	10	6	0	6
TCN3-LTR_1090	0	0	0	1	1	2	1	1	2	0	0	0	0	1	1
TCN4-LTR_99	0	0	0	0	1	1	0	0	0	0	1	1	0	0	0
LTR11_CN_483	0	0	0	0	2	2	0	0	0	0	0	0	0	1	1
LTR11_CN_482	0	0	0	0	0	0	0	1	1	0	0	0	0	0	0
LTR11_CN_481	0	0	0	0	0	0	0	0	0	0	0	0	0	0	0
LTR11_CN_480	0	0	0	2	0	2	0	1	1	0	0	0	2	1	3
DNA6-2_MLP_669	0	0	0	3	0	3	4	0	4	1	0	1	1	0	1
TCN3-LTR_1089	0	0	0	0	0	0	0	0	0	0	0	0	1	0	1
TCN3-LTR_1088	0	0	0	0	0	0	3	0	3	0	0	0	0	0	0
Helitron-1_AN_751	0	0	0	0	1	1	0	1	1	0	0	0	0	0	0
TCN3-LTR_1087	0	0	0	0	0	0	0	1	1	0	0	0	0	2	2
LTR11_CN_479	0	0	0	0	0	0	0	0	0	0	0	0	0	0	0
LTR11_CN_478	0	5	5	0	12	12	0	6	6	0	9	9	0	2	2
LTR11_CN_477	1	0	1	1	0	1	0	0	0	1	0	1	0	0	0
LTR11_CN_476	0	0	0	0	2	2	0	0	0	0	0	0	0	0	0
LTR11_CN_475	0	0	0	0	0	0	0	0	0	0	0	0	0	0	0
LTR11_CN_474	0	0	0	1	0	1	0	0	0	0	1	1	0	0	0
LTR11_CN_473	52	0	52	0	0	0	0	0	0	0	0	0	0	0	0
LTR11_CN_472	0	0	0	2	0	2	1	0	1	0	0	0	0	0	0
Copia-7_ADe-I_668	0	2	2	0	5	5	0	3	3	0	0	0	0	0	0
LTR11_CN_471	13	0	13	0	5	5	3	11	14	0	2	2	0	1	1
Copia-7_ADe-I_667	0	1	1	0	13	13	0	12	12	1	2	3	0	3	3
LTR11_CN_470	0	1	1	0	0	0	0	1	1	0	0	0	0	1	1
TCN2-LTR_1000	1	1	2	9	0	9	7	0	7	3	0	3	1	0	1
LTR11_CN_469	0	0	0	0	2	2	0	2	2	1	0	1	0	0	0
TCN5-I_1278	0	0	0	1	2	3	2	1	3	1	5	6	3	0	3
TCN5-I_1277	0	1	1	0	3	3	0	1	1	0	1	1	0	0	0
TCN5-I_1276	7	6	13	16	8	24	17	8	25	11	4	15	10	6	16
LTR11_CN_1316	0	2	2	2	2	4	0	3	3	2	0	2	0	2	2
LTR11_CN_1315	1	0	1	2	2	4	0	0	0	1	0	1	0	0	0
LTR11_CN_1314	0	0	0	0	1	1	0	3	3	0	1	1	0	1	1
LTR11_CN_1313	0	0	0	0	1	1	0	1	1	0	0	0	0	1	1
LTR11_CN_1312	0	0	0	0	0	0	0	0	0	0	0	0	0	0	0
EnSpm-2_ROr_1052	0	0	0	0	0	0	0	0	0	0	0	0	0	0	0
REP-2_PSt_1071	0	0	0	0	1	1	0	0	0	0	0	0	0	0	0
TCN2-LTR_1334	1	0	1	0	0	0	1	1	2	1	0	1	0	0	0
TCN2-LTR_1333	0	0	0	0	0	0	1	1	2	0	0	0	0	2	2
TCN2-LTR_1332	1	0	1	0	1	1	0	1	1	0	0	0	0	0	0
TCN6-I_116	0	0	0	0	0	0	0	0	0	0	1	1	0	0	0
TCN6-I_115	2	0	2	3	0	3	1	1	2	3	2	5	3	0	3
TCN6-I_114	0	1	1	0	1	1	0	1	1	1	0	1	0	1	1
TCN6-I_113	1507	28261	29768	8	7	15	12	11	23	29	40	69	68	92	160
TCN6-I_112	40	141	181	5	1	6	4	1	5	4	0	4	4	1	5
TCN3-I_1262	1	1	2	0	15	15	0	15	15	1	2	3	1	5	6
TCN3-I_1261	2	2	4	13	2	15	13	3	16	7	10	17	4	6	10
TCN3-I_1260	2	0	2	12	4	16	10	4	14	13	0	13	8	3	11
TCN760_540	0	0	0	0	0	0	0	0	0	0	0	0	0	0	0
TCN5-LTR_713	2	0	2	1	0	1	1	0	1	0	0	0	0	0	0
TCN5-LTR_712	2	0	2	1	0	1	0	0	0	0	0	0	1	0	1
TCN5-LTR_711	0	0	0	0	1	1	0	3	3	0	1	1	1	0	1
TCN3-I_1259	0	1	1	0	2	2	0	0	0	0	0	0	0	1	1
TCN1-LTR_199	0	0	0	1	0	1	0	0	0	0	0	0	1	0	1
TCN4-LTR_1099	0	0	0	2	0	2	0	0	0	0	0	0	0	1	1
TCN1-LTR_198	0	0	0	0	0	0	0	0	0	1	0	1	0	0	0
TCN4-LTR_1098	0	3	3	0	3	3	0	13	13	0	3	3	0	1	1
Harbinger-4_PSt_588	0	0	0	0	0	0	2	0	2	3	6	9	2	14	16
LSU-rRNA_Sce_752	0	0	0	0	0	0	0	0	0	0	0	0	0	0	0
TCN5-I_389	1	0	1	2	0	2	0	0	0	6	1	7	2	0	2
TCN760_539	0	0	0	3	0	3	2	0	2	1	0	1	1	0	1
TCN5-I_388	0	0	0	2	0	2	0	0	0	0	0	0	1	0	1
TCN3-I_85	375	8596	8971	0	0	0	1	2	3	0	0	0	1	2	3
TCN760_538	0	0	0	0	0	0	0	0	0	0	3	3	0	0	0
TCN5-I_387	4	5	9	10	25	35	10	17	27	72	25	97	111	30	141
TCN3-I_84	21	609	630	0	1	1	1	0	1	0	0	0	0	0	0
TCN760_537	1	0	1	2	0	2	0	1	1	0	1	1	0	0	0
TCN3-I_83	140	9736	9876	16	39	55	4	1	5	2	22	24	4	16	20
TCN760_536	0	0	0	0	0	0	0	0	0	0	0	0	0	0	0
TCN3-I_82	161	6107	6268	6	41	47	1	0	1	2	8	10	3	3	6
TCN760_535	0	0	0	0	1	1	0	1	1	0	0	0	0	0	0
TCN3-I_81	448	5013	5461	1	1	2	3	4	7	0	0	0	0	1	1
TCN760_534	0	0	0	0	1	1	0	0	0	0	0	0	0	1	1
TCN3-I_80	1105	22086	23191	2	2	4	1	6	7	2	5	7	1	2	3
TCN760_533	0	0	0	0	1	1	1	0	1	0	0	0	0	0	0
TCN4-LTR_909	0	0	0	5	0	5	1	0	1	0	0	0	1	0	1
TCN760_532	0	0	0	1	0	1	0	0	0	0	0	0	0	0	0
TCN4-LTR_908	1	3	4	3	0	3	1	2	3	3	0	3	0	0	0
TCN760_531	0	0	0	1	1	2	0	0	0	0	0	0	0	0	0
TCN760_530	0	0	0	0	0	0	0	0	0	0	0	0	1	0	1
TCN3-I_79	349	13164	13513	13	15	28	6	9	15	19	27	46	12	17	29
TCN760_529	0	2	2	0	2	2	0	0	0	0	3	3	0	1	1
TCN760_528	2	0	2	0	0	0	3	0	3	1	0	1	0	0	0
TCN4-I_386	0	1	1	0	6	6	0	8	8	3	2	5	0	2	2
TCN4-I_385	0	4	4	6	7	13	5	9	14	4	8	12	0	7	7
TCN4-I_384	0	1	1	0	0	0	0	0	0	0	0	0	0	0	0
TCN3-LTR_1007	0	1	1	0	0	0	0	1	1	0	2	2	0	2	2
TCN3-LTR_1006	1	1	2	1	0	1	0	0	0	0	1	1	0	0	0
TCN6-I_797	2	1	3	4	0	4	1	0	1	3	0	3	5	0	5
TCN6-I_796	0	1	1	1	2	3	2	1	3	0	0	0	2	1	3
TCN6-I_795	1	2	3	1	4	5	0	2	2	0	2	2	0	3	3
TCN6-I_794	0	2	2	1	4	5	0	0	0	0	1	1	0	3	3
TCN6-I_793	2	1	3	5	4	9	1	2	3	1	1	2	0	1	1
LTR11_CN_756	80	1	81	1855	1	1856	89	1	90	587	0	587	458	0	458
LTR11_CN_755	0	0	0	0	0	0	1	1	2	0	0	0	0	1	1
LTR11_CN_754	0	1	1	0	1	1	0	0	0	0	0	0	0	0	0
LTR11_CN_753	0	0	0	0	0	0	1	0	1	0	0	0	0	0	0
TCN3-I_296	16	5	21	43	12	55	50	7	57	21	7	28	15	8	23
TCN3-I_295	6	8	14	6	28	34	8	22	30	2	27	29	7	17	24
TCN1-I_1322	0	0	0	2	0	2	0	0	0	1	0	1	1	0	1
TCN1-I_1321	6	23	29	3	94	97	5	18	23	3	74	77	5	68	73
Copia-14_BG-I_857	6	0	6	10	0	10	5	0	5	2	1	3	2	0	2
TCN3-LTR_1348	2	0	2	4	0	4	1	2	3	0	1	1	0	0	0
TCN3-LTR_1347	0	1	1	1	0	1	1	1	2	0	0	0	1	0	1
TCN3-LTR_1346	0	0	0	0	0	0	3	0	3	0	0	0	1	0	1
TCN3-LTR_1345	0	0	0	0	0	0	1	0	1	1	0	1	0	0	0
TCN3-LTR_1344	0	0	0	0	0	0	2	0	2	0	0	0	0	1	1
TCN3-LTR_1343	1	0	1	0	0	0	0	0	0	0	1	1	0	1	1
TCN3-LTR_1342	1	2	3	3	0	3	5	3	8	4	2	6	3	0	3
TCN3-LTR_1341	0	0	0	2	0	2	0	0	0	1	0	1	1	0	1
TCN2-I_292	0	0	0	1	0	1	0	0	0	0	0	0	2	0	2
Cnl1_399	0	0	0	1	0	1	0	0	0	1	0	1	1	0	1
TCN2-I_291	0	0	0	7	0	7	0	0	0	2	0	2	1	0	1
Cnl1_398	0	0	0	0	3	3	0	6	6	0	0	0	0	3	3
Gypsy-20_PGr-I_348	0	0	0	0	0	0	0	0	0	2	0	2	0	0	0
Gypsy-8_CPu-I_586	0	0	0	0	0	0	0	0	0	0	0	0	0	0	0
Copia-37_MLP-I_273	0	0	0	0	0	0	1	0	1	0	0	0	0	0	0
DIRS-2_PGr-I_975	0	0	0	0	0	0	0	0	0	0	0	0	1	0	1
LTR12_CN_275	1	0	1	0	0	0	1	0	1	0	0	0	0	0	0
TCN2-LTR_294	0	0	0	3	0	3	4	1	5	3	0	3	0	0	0
TCN2-LTR_293	0	0	0	0	0	0	0	0	0	0	0	0	0	0	0
TCN1-I_282	0	0	0	3	0	3	1	0	1	0	0	0	0	0	0
TCN1-I_281	0	1	1	3	2	5	1	1	2	0	0	0	1	0	1
TCN4-I_1097	1	24	25	14	1	15	17	0	17	7	1	8	4	0	4
TCN4-I_1096	0	0	0	0	0	0	0	0	0	0	0	0	0	0	0
TCN4-I_1095	1	0	1	7	0	7	10	0	10	3	0	3	4	0	4
TCN4-I_1094	5	330	335	26	23	49	19	26	45	15	8	23	9	17	26
TCN4-I_1093	0	0	0	0	9	9	0	3	3	0	0	0	1	3	4
TCN4-I_1092	1	0	1	2	1	3	1	0	1	0	0	0	1	0	1
TCN4-LTR_1009	2	0	2	1	0	1	0	0	0	0	0	0	0	0	0
TCN4-I_304	0	0	0	0	0	0	0	0	0	0	0	0	0	0	0
TCN760_800	0	0	0	0	1	1	0	0	0	0	0	0	0	0	0
Zisupton-4_PGr_920	0	0	0	0	0	0	0	0	0	0	0	0	0	2	2
Cnl1_345	1	2	3	4	3	7	8	8	16	5	1	6	5	3	8
Cnl1_344	1	1	2	8	1	9	3	2	5	4	0	4	4	2	6
Cnl1_343	2	330	332	12	16	28	9	13	22	9	4	13	5	8	13
Cnl1_342	5	7	12	20	34	54	16	2	18	9	29	38	4	30	34
Cnl1_341	1	1	2	8	4	12	17	2	19	5	3	8	11	2	13
Cnl1_340	1	5	6	15	3	18	10	9	19	4	25	29	6	17	23
TCN4-LTR_1356	0	0	0	0	0	0	0	2	2	0	0	0	0	0	0
TCN4-LTR_1355	0	0	0	1	2	3	0	0	0	0	1	1	0	0	0
TCN4-LTR_1354	1	0	1	1	2	3	0	0	0	0	1	1	0	0	0
TCN4-LTR_1353	1	1	2	5	5	10	5	3	8	2	2	4	2	2	4
TCN4-LTR_1352	2	1	3	34	0	34	6	0	6	3	0	3	4	0	4
Zisupton-4_PGr_919	0	0	0	0	0	0	1	0	1	0	0	0	0	0	0
Cnl1_339	2	11	13	7	19	26	4	7	11	3	191	194	0	348	348
Cnl1_338	1	1	2	5	50	55	2	49	51	6	18	24	2	9	11
Cnl1_337	1	0	1	18	5	23	22	2	24	11	1	12	11	6	17
Cnl1_336	20	173	193	8115	285	8400	0	8	8	163488	521596	685084	170591	595417	766008
Cnl1_335	13	179	192	13547	472	14019	0	0	0	262914	1423396	1686310	247528	1339162	1586690
Cnl1_334	14	167	181	12438	442	12880	0	0	0	158047	816173	974220	162987	643961	806948
Cnl1_333	14	146	160	10763	437	11200	0	0	0	151135	862481	1013616	153319	625658	778977
Cnl1_332	0	0	0	1	26	27	4	27	31	4	18	22	40	18	58
Cnl1_331	0	4	4	0	13	13	0	2	2	1	8	9	0	10	10
Cnl1_330	7	0	7	4	3	7	3	2	5	11	0	11	5	1	6
PIF_Harbinger-1_CryNeo_1070	0	5	5	0	3	3	0	6	6	0	3	3	0	1	1
Gypsy-9_MLP-I_749	0	0	0	0	0	0	0	0	0	0	0	0	1	0	1
MuDR-3_PGr_595	0	0	0	0	1	1	1	0	1	0	0	0	0	0	0
TCN3-I_219	5	4	9	24	45	69	9	19	28	18	11	29	7	9	16
TCN3-I_218	1	16	17	10	21	31	15	18	33	10	5	15	4	5	9
TCN3-I_217	1	63	64	8	10	18	5	2	7	2	2	4	5	0	5
TCN3-I_216	0	0	0	0	0	0	5	0	5	0	1	1	3	0	3
Sagan-5_TMe_1139	0	0	0	0	1	1	0	0	0	0	0	0	0	0	0
Cnl1_329	1	0	1	0	1	1	0	0	0	1	3	4	0	0	0
Cnl1_328	0	0	0	0	3	3	0	3	3	1	2	3	0	0	0
Cnl1_327	1	1	2	5	0	5	2	1	3	1	2	3	0	0	0
Cnl1_326	1	0	1	19	5	24	10	1	11	79	1	80	133	0	133
Cnl1_325	1	2	3	1	2	3	2	1	3	10	2	12	10	6	16
Cnl1_324	1300	36805	38105	33	10	43	8	7	15	852	14526	15378	1061	23986	25047
Cnl1_323	1	116	117	11	568	579	10	6	16	9	130	139	6	93	99
Cnl1_322	0	0	0	0	1	1	0	5	5	0	3	3	0	2	2
Cnl1_321	14	191	205	12259	402	12661	0	0	0	261272	1107102	1368374	249061	1410391	1659452
Cnl1_320	0	0	0	1	0	1	0	1	1	0	0	0	0	0	0
Cnl1_319	0	0	0	426	21	447	0	0	0	38	49	87	65	222	287
Cnl1_318	30	1	31	36	5	41	59	4	63	41	7	48	29	9	38
Cnl1_317	1	4	5	4	7	11	1	9	10	0	2	2	0	2	2
Cnl1_316	0	5	5	1125	62	1187	0	0	0	23132	245476	268608	17573	380026	397599
Cnl1_315	0	2	2	506	40	546	0	0	0	8132	150342	158474	5794	223353	229147
TCN2-I_1149	1	0	1	0	0	0	0	0	0	4	1	5	3	0	3
Cnl1_314	0	0	0	0	2	2	4	5	9	0	4	4	0	1	1
TCN2-I_1148	0	0	0	0	0	0	0	0	0	0	0	0	0	0	0
Cnl1_313	0	4	4	686	50	736	0	0	0	12418	187797	200215	8601	293468	302069
Cnl1_312	2	0	2	0	0	0	3	3	6	0	0	0	0	2	2
Cnl1_311	0	2	2	0	2	2	0	7	7	0	3	3	0	0	0
Cnl1_310	0	0	0	0	4	4	0	3	3	0	0	0	0	2	2
TCN6-I_1013	0	0	0	0	0	0	0	0	0	0	0	0	0	0	0
TCN6-I_1012	1	1	2	3	2	5	5	1	6	0	0	0	0	1	1
Cnl1_309	0	1	1	0	0	0	0	0	0	0	0	0	0	0	0
Cnl1_308	1	0	1	12	0	12	16	0	16	5	0	5	8	0	8
TCN4-I_622	0	0	0	0	0	0	0	0	0	0	0	0	0	0	0
Cnl1_307	0	0	0	4	0	4	1	0	1	1	0	1	1	0	1
TCN4-I_621	0	0	0	0	0	0	0	0	0	1	0	1	0	0	0
TCN4-I_620	14	0	14	20	13	33	28	11	39	19	12	31	13	12	25
Cnl1_663	1	0	1	7	12	19	5	3	8	3	1	4	1	0	1
Cnl1_662	1	415	416	13	3955	3968	13	16	29	8	1407	1415	10	1062	1072
Cnl1_661	3	1	4	11	4	15	18	8	26	18	5	23	4	7	11
Cnl1_660	2	6	8	20	8	28	15	8	23	7	11	18	9	14	23
TCN2-LTR_215	0	0	0	0	9	9	1	0	1	0	0	0	0	0	0
TCN2-LTR_214	0	0	0	4	3	7	1	0	1	3	0	3	0	0	0
Gypsy-11_SCH-I_1054	0	0	0	0	0	0	0	0	0	1	0	1	1	0	1
TCN4-I_619	3	12	15	6	31	37	9	21	30	8	30	38	9	20	29
Cnl1_659	1	0	1	0	2	2	0	2	2	0	0	0	0	1	1
Cnl1_658	0	1	1	0	0	0	0	1	1	0	1	1	0	0	0
Cnl1_657	0	0	0	1	0	1	0	2	2	1	1	2	0	0	0
Cnl1_656	1	40	41	1946	105	2051	0	0	0	43749	205926	249675	48367	220119	268486
Cnl1_655	9	92	101	4577	185	4762	0	0	0	125040	605567	730607	104245	812313	916558
Cnl1_654	0	0	0	0	0	0	0	1	1	0	0	0	0	3	3
Cnl1_653	1	0	1	1	1	2	3	0	3	0	0	0	0	0	0
Cnl1_1045	3	10	13	13	24	37	1	1	2	0	0	0	0	3	3
Cnl1_652	0	0	0	0	0	0	1	0	1	1	0	1	0	0	0
Cnl1_1044	36	2	38	7	16	23	6	8	14	110	6	116	144	6	150
Cnl1_651	0	6	6	6462	247	6709	0	0	0	21595	444164	465759	18001	88495	106496
Cnl1_1043	281	1	282	312	2	314	276	8	284	719	13	732	680	11	691
Cnl1_650	0	1	1	356	28	384	0	0	0	6629	85994	92623	4930	121382	126312
Cnl1_1042	2	3	5	7	21	28	8	11	19	4	5	9	1	5	6
Cnl1_1041	4	2	6	17	15	32	23	14	37	8	8	16	9	8	17
TCN6-I_1358	0	0	0	0	0	0	0	0	0	0	0	0	0	0	0
Cnl1_1040	8	127	135	13	579	592	10	16	26	28	157	185	4	99	103
TCN6-I_1357	0	0	0	1	2	3	5	0	5	0	0	0	2	1	3
TCN5-LTR_1011	0	0	0	0	6	6	0	6	6	1	2	3	1	4	5
TCN1-LTR_764	0	0	0	2	0	2	0	0	0	2	0	2	1	0	1
TCN1-LTR_763	0	5	5	2	2	4	0	0	0	0	0	0	0	2	2
TCN1-LTR_762	0	0	0	0	2	2	0	0	0	0	0	0	0	0	0
TCN1-LTR_761	1	0	1	2	1	3	0	0	0	3	0	3	2	0	2
TCN1-LTR_760	2	1	3	16	9	25	3	1	4	4	5	9	5	0	5
TCN3-I_897	0	0	0	0	2	2	0	4	4	0	2	2	0	2	2
TCN3-I_896	0	0	0	1	0	1	0	0	0	0	0	0	0	0	0
TCN3-I_895	6	3	9	9	12	21	3	15	18	9	6	15	17	2	19
TCN3-I_894	8	1	9	25	0	25	27	1	28	11	2	13	9	1	10
Cnl1_649	0	64	64	8	215	223	3	2	5	3	283	286	0	221	221
Cnl1_648	0	3	3	2	23	25	2	22	24	1	7	8	3	8	11
Cnl1_647	1	6	7	9957	292	10249	0	0	0	58050	483298	541348	63769	131589	195358
Cnl1_1039	24	293	317	17389	622	18011	0	0	0	382472	1475092	1857564	350357	1893144	2243501
Cnl1_646	2	43	45	8737	332	9069	0	0	0	68487	564283	632770	79535	250889	330424
Cnl1_1038	14	184	198	13870	483	14353	0	0	0	221301	739132	960433	216315	864965	1081280
Cnl1_645	4	1	5	9	0	9	15	0	15	6	0	6	5	0	5
Cnl1_1037	14	146	160	10788	439	11227	0	0	0	150862	892245	1043107	152940	633771	786711
Cnl1_644	0	0	0	0	0	0	0	0	0	0	0	0	0	0	0
Cnl1_1036	17	1	18	2	0	2	0	1	1	0	0	0	0	0	0
Cnl1_643	0	1	1	1238	30	1268	0	0	0	28938	127526	156464	23492	197140	220632
Cnl1_1035	2	41	43	5543	133	5676	0	0	0	66843	196164	263007	83426	215603	299029
Cnl1_642	0	0	0	0	0	0	1	0	1	0	0	0	0	0	0
Cnl1_1034	0	0	0	0	3	3	1	2	3	1	3	4	0	0	0
Cnl1_641	0	0	0	1	0	1	0	0	0	0	0	0	0	0	0
Cnl1_1033	0	0	0	0	0	0	0	0	0	0	0	0	0	0	0
Cnl1_1032	0	1	1	1	3	4	3	2	5	0	4	4	0	4	4
Cnl1_1031	12	137	149	5771	221	5992	0	0	0	177310	767902	945212	150689	1027779	1178468
Cnl1_1030	0	0	0	7	1	8	12	3	15	10	1	11	11	2	13
TCN4-I_1008	1	3	4	3	9	12	5	4	9	2	1	3	1	3	4
TCN5-LTR_392	0	0	0	0	1	1	1	0	1	1	0	1	0	1	1
TCN5-LTR_391	0	2	2	6	68	74	0	1	1	2	4	6	1	7	8
TCN5-LTR_390	0	0	0	1	0	1	1	0	1	0	0	0	1	0	1
Cnl1_1029	2	40	42	8927	284	9211	0	0	0	62799	197030	259829	78859	213353	292212
Cnl1_1028	2	46	48	14	154	168	30	12	42	10	11	21	9	7	16
Cnl1_1027	2	1	3	27	22	49	7	15	22	12	8	20	43	11	54
Cnl1_1026	0	1	1	0	12	12	0	1	1	0	0	0	0	0	0
Cnl1_1025	0	0	0	0	0	0	0	0	0	1	1	2	0	1	1
Cnl1_1024	0	0	0	0	2	2	0	2	2	0	2	2	0	0	0
Cnl1_1023	0	0	0	3	0	3	0	0	0	0	0	0	0	0	0
Cnl1_1022	0	0	0	0	2	2	0	0	0	0	0	0	1	0	1
Cnl1_1021	0	1	1	1	0	1	0	1	1	0	0	0	0	0	0
Cnl1_1020	0	3	3	782	40	822	0	0	0	2277	273661	275938	1178	37486	38664
TCN3-I_517	8	25	33	24	180	204	39	16	55	17	49	66	14	63	77
TCN3-I_516	1	3	4	2	5	7	0	0	0	1	2	3	0	1	1
TCN3-I_515	0	4	4	1	17	18	2	16	18	0	8	8	3	6	9
TCN2-I_889	0	1	1	1	0	1	0	1	1	0	0	0	0	0	0
TCN4-I_1351	0	0	0	0	0	0	0	0	0	1	0	1	0	0	0
TCN2-I_888	0	1	1	0	0	0	0	0	0	0	0	0	0	0	0
TCN4-I_1350	0	0	0	1	0	1	0	0	0	0	0	0	0	0	0
TCN2-I_887	3	0	3	0	2	2	0	0	0	0	0	0	0	1	1
TCN2-I_886	2	0	2	0	2	2	0	1	1	0	1	1	0	1	1
TCN2-I_885	85	32	117	9	304	313	3	340	343	334	49	383	362	46	408
TCN2-I_884	0	3	3	0	27	27	3	17	20	1	4	5	3	4	7
TCN3-LTR_782	14	19	33	27	26	53	29	41	70	16	30	46	25	21	46
TCN2-I_883	0	0	0	5	0	5	2	0	2	0	0	0	0	0	0
TCN3-LTR_781	1	34	35	3	415	418	1	1	2	2	96	98	5	68	73
TCN2-I_882	5	1	6	7	7	14	4	1	5	5	5	10	4	6	10
TCN3-LTR_780	142	0	142	647	1	648	2	0	2	425	1	426	334	2	336
TCN2-I_881	1	1	2	0	0	0	1	0	1	1	0	1	0	0	0
Cnl1_1019	0	3	3	772	40	812	0	0	0	2348	274650	276998	1193	37288	38481
Cnl1_1018	0	2	2	563	38	601	0	0	0	7434	137334	144768	5479	202700	208179
Copia-1_SCH-I_576	0	0	0	0	0	0	0	1	1	0	0	0	0	0	0
TCN4-I_1349	25	4	29	126	31	157	99	27	126	48	12	60	36	14	50
TCN2-LTR_893	0	0	0	5	1	6	8	2	10	2	0	2	1	0	1
TCN2-LTR_892	0	0	0	0	3	3	0	1	1	0	1	1	0	1	1
TCN2-LTR_891	0	0	0	1	5	6	2	2	4	2	0	2	2	0	2
TCN2-LTR_890	0	0	0	0	2	2	0	0	0	0	2	2	0	2	2
TCN3-LTR_779	28	1	29	289	1	290	336	0	336	46	1	47	37	0	37
TCN2-I_513	2	3	5	4	5	9	3	6	9	0	7	7	0	6	6
TCN2-I_512	0	0	0	0	4	4	0	5	5	3	0	3	1	0	1
TCN2-I_511	0	0	0	2	0	2	0	0	0	1	0	1	0	0	0
Cnl1_970	0	333	333	0	20	20	2	34	36	1	8	9	0	4	4
TCN5-I_912	14	2006	2020	35	14478	14513	22	1583	1605	7	5314	5321	9	4539	4548
TCN5-I_911	7	1	8	3	2	5	1	5	6	15	2	17	24	4	28
TCN5-I_910	2	4	6	2	39	41	3	9	12	1	15	16	2	14	16
Cnl1_969	1	2	3	1	0	1	1	4	5	0	0	0	0	0	0
Cnl1_968	0	0	0	2214	86	2300	0	0	0	2299	210869	213168	1439	14218	15657
Cnl1_967	7	11	18	2	8	10	1	6	7	20	25	45	0	5	5
Cnl1_966	2	1	3	1	2	3	0	0	0	0	0	0	0	0	0
TCN760_1287	0	1	1	1	1	2	0	0	0	0	1	1	1	1	2
TCN1-I_872	1	1	2	0	2	2	0	1	1	0	2	2	1	0	1
Cnl1_965	1	79	80	6060	198	6258	0	0	0	135823	697738	833561	113390	889294	1002684
TCN760_1286	0	0	0	1	1	2	0	0	0	1	0	1	0	0	0
TCN1-I_871	45	6	51	87	28	115	89	32	121	144	10	154	102	7	109
Cnl1_964	3	0	3	8	2	10	8	2	10	4	0	4	1	3	4
TCN760_1285	0	1	1	0	0	0	0	0	0	0	0	0	0	1	1
Cnl1_963	0	8	8	8	55	63	5	68	73	0	17	17	2	11	13
Cnl1_962	4	1	5	11	9	20	17	13	30	6	6	12	9	7	16
Helitron-1_ROr_1237	0	0	0	0	3	3	0	0	0	0	1	1	0	2	2
Cnl1_961	6	3	9	14	9	23	2	8	10	17	10	27	8	2	10
Cnl1_960	0	0	0	0	0	0	0	0	0	0	0	0	0	0	0
TCN2-LTR_514	0	1	1	0	4	4	1	2	3	0	1	1	0	0	0
Gypsy-117_MLP-I_155	0	0	0	0	2	2	0	2	2	0	0	0	0	0	0
TCN1-LTR_1255	2	0	2	4	0	4	0	0	0	1	0	1	0	0	0
TCN1-LTR_1254	1	0	1	2	4	6	0	4	4	2	2	4	1	1	2
TCN1-LTR_1253	0	0	0	0	2	2	0	1	1	0	1	1	0	0	0
TCN1-LTR_1252	0	0	0	0	0	0	0	0	0	0	0	0	0	0	0
Cnl1_959	0	0	0	7	0	7	4	0	4	6	0	6	3	0	3
Cnl1_958	1	0	1	2	0	2	3	0	3	0	0	0	0	0	0
Cnl1_957	0	0	0	0	0	0	0	0	0	0	0	0	0	0	0
Cnl1_956	9	0	9	13	0	13	16	0	16	16	0	16	13	0	13
TCN1-I_500	8	3	11	83	24	107	56	25	81	17	13	30	21	13	34
Cnl1_955	0	0	0	0	0	0	0	0	0	0	0	0	0	0	0
Cnl1_954	0	0	0	2	8	10	1	0	1	0	1	1	1	3	4
Cnl1_953	1	0	1	14	0	14	15	1	16	9	0	9	7	2	9
Cnl1_952	0	0	0	0	0	0	1	0	1	0	0	0	0	0	0
Cnl1_951	0	0	0	0	0	0	0	0	0	0	0	0	0	0	0
TCN10-LTR_679	0	0	0	2	0	2	1	0	1	0	0	0	3	0	3
Cnl1_950	0	1	1	0	0	0	0	0	0	0	0	0	0	0	0
TCN4-I_907	9	4	13	36	8	44	31	8	39	28	2	30	21	7	28
TCN4-I_906	0	2	2	1	9	10	4	4	8	1	1	2	0	3	3
TCN4-I_905	0	0	0	3	3	6	1	1	2	4	0	4	1	1	2
TCN4-I_904	0	142	142	1	647	648	0	4	4	2	425	427	2	336	338
Cnl1_949	1	0	1	1	0	1	1	0	1	0	0	0	0	0	0
Cnl1_948	0	0	0	6	2	8	6	0	6	3	0	3	8	0	8
Cnl1_947	1	0	1	1	0	1	0	0	0	0	0	0	0	0	0
Cnl1_946	1	38	39	970	58	1028	0	0	0	26607	138939	165546	27191	148972	176163
Cnl1_945	0	0	0	495	10	505	0	0	0	40	1121	1161	47	843	890
Cnl1_944	0	1	1	338	28	366	0	0	0	6651	88644	95295	4938	125301	130239
Cnl1_943	0	1	1	0	6	6	3	6	9	0	5	5	0	4	4
Cnl1_942	1	0	1	8	2	10	9	0	9	7	0	7	4	3	7
Cnl1_941	14	177	191	11554	409	11963	0	0	0	214963	721154	936117	210331	851328	1061659
Cnl1_940	3	0	3	15	4	19	10	5	15	4	1	5	3	12	15
PIF_Harbinger-1_CryNeo_984	0	0	0	0	0	0	0	0	0	0	0	0	0	0	0
LTR12_CN_1069	0	0	0	0	0	0	1	0	1	0	0	0	0	1	1
LTR12_CN_1068	0	0	0	0	1	1	0	0	0	0	0	0	0	3	3
LTR12_CN_1067	0	0	0	0	0	0	0	0	0	0	0	0	0	0	0
LTR12_CN_1066	0	0	0	0	1	1	0	1	1	0	0	0	0	0	0
LTR12_CN_1065	0	0	0	0	0	0	0	0	0	0	0	0	0	0	0
LTR12_CN_1064	0	3	3	0	8	8	0	1	1	0	3	3	0	3	3
LTR12_CN_1063	0	0	0	1	1	2	1	0	1	0	0	0	0	0	0
TCN6-LTR_1284	0	0	0	1	0	1	4	0	4	0	0	0	2	0	2
TCN6-LTR_1283	1	0	1	1	0	1	0	0	0	0	0	0	0	0	0
Copia-14_BG-I_154	0	0	0	0	0	0	0	0	0	0	0	0	0	0	0
Cnl1_939	2	1	3	17	1	18	27	0	27	12	0	12	19	1	20
Cnl1_938	1	4	5	12	3	15	10	9	19	3	25	28	6	17	23
Cnl1_937	30	1	31	36	5	41	59	4	63	39	7	46	25	8	33
Cnl1_936	5	3	8	5	7	12	4	9	13	2	3	5	2	2	4
Cnl1_935	12	2	14	6	1	7	8	2	10	14	4	18	6	0	6
Cnl1_934	3	4	7	58	6	64	66	2	68	17	21	38	16	24	40
Cnl1_933	113	4	117	360	7	367	432	2	434	121	2	123	150	4	154
TCN10-LTR_1140	0	5	5	0	0	0	0	0	0	0	4	4	0	3	3
Cnl1_932	25	17	42	13	120	133	2	15	17	20	109	129	10	57	67
Cnl1_931	4	0	4	7	1	8	17	0	17	8	6	14	8	9	17
Cnl1_930	1	2	3	2	18	20	2	20	22	0	19	19	0	16	16
Copia-1_RGl-I_971	0	0	0	0	0	0	0	0	0	0	0	0	0	0	0
Cnl1_929	7	1	8	15	1	16	20	0	20	7	1	8	6	2	8
Cnl1_928	214	13717	13931	90	114604	114694	22	4679	4701	104	25099	25203	410	22042	22452
Cnl1_927	2	3	5	27	3	30	5	3	8	1	2	3	0	1	1
Cnl1_926	1	1	2	3	14	17	2	11	13	10	7	17	1	2	3
Gypsy-2_Cop-I_464	1	0	1	1	0	1	0	1	1	0	0	0	0	0	0
Cnl1_925	1	0	1	1	14	15	4	24	28	1	17	18	5	15	20
Cnl1_924	2	1	3	30	14	44	10	8	18	11	7	18	27	9	36
Cnl1_923	13	168	181	8236	280	8516	0	1	1	173134	526245	699379	178226	601809	780035
Cnl1_922	14	185	199	12191	455	12646	0	0	0	225934	879095	1105029	220149	1097674	1317823
Cnl1_921	2	40	42	8518	318	8836	0	0	0	68703	451946	520649	80070	220388	300458
TCN6-LTR_117	46	143	189	1	0	1	2	0	2	0	0	0	0	0	0
LTR11_CN_1240	4	0	4	2	6	8	1	8	9	0	4	4	0	0	0
Cnl1_1305	2	1	3	28	9	37	17	5	22	6	8	14	12	6	18
Cnl1_1304	2	0	2	9	5	14	9	12	21	6	8	14	4	8	12
Cnl1_1303	2	1	3	26	33	59	6	22	28	11	15	26	59	18	77
Cnl1_1302	8	127	135	10	579	589	8	16	24	28	157	185	3	99	102
Cnl1_1301	25	336	361	16577	660	17237	0	0	0	372749	1532449	1905198	355957	1918400	2274357
Cnl1_1300	14	174	188	12538	460	12998	0	0	0	162946	816525	979471	168377	653054	821431
LTR11_CN_1239	0	0	0	3	2	5	3	0	3	1	1	2	1	0	1
LTR11_CN_1238	0	0	0	1	1	2	1	0	1	0	0	0	1	0	1
TCN3-LTR_707	0	0	0	0	1	1	0	0	0	0	0	0	0	0	0
TCN3-LTR_706	0	1	1	0	5	5	0	5	5	1	6	7	0	3	3
HARBINGER1_CN_349	0	0	0	0	0	0	0	0	0	0	0	0	0	0	0
TCN3-LTR_705	0	0	0	0	2	2	0	0	0	0	0	0	0	0	0
TCN3-LTR_704	0	0	0	0	0	0	0	0	0	0	0	0	0	0	0
TCN3-LTR_703	5	0	5	3	0	3	2	0	2	2	0	2	1	1	2
Gypsy-63_MLP-I_1233	0	0	0	0	0	0	0	0	0	0	0	0	0	0	0
TCN3-LTR_702	1	0	1	0	0	0	2	0	2	0	0	0	2	0	2
TCN3-LTR_701	3	6	9	4	9	13	7	5	12	8	10	18	10	1	11
TCN3-LTR_700	1	0	1	0	2	2	0	2	2	0	2	2	0	0	0
TCN10-LTR_985	2	0	2	0	0	0	0	1	1	0	1	1	0	0	0
TCN760_125	325	5273	5598	6	0	6	1	0	1	13	9	22	392	1275	1667
TCN760_124	0	0	0	0	0	0	0	0	0	0	0	0	0	0	0
TCN760_123	0	5	5	11	1	12	5	0	5	0	21	21	2	26	28
TCN760_122	0	0	0	1	0	1	0	1	1	0	0	0	0	2	2
TCN760_121	0	0	0	0	0	0	0	0	0	0	0	0	0	0	0
TCN760_120	1	3	4	2	2	4	1	1	2	1	1	2	1	0	1
Copia-6_Trm-I_666	1	3	4	2	3	5	1	2	3	4	5	9	1	19	20
Copia-6_Trm-I_665	67	15	82	0	2	2	0	1	1	0	0	0	1	0	1
TCN5-I_1171	0	7	7	0	29	29	2	41	43	1	11	12	0	18	18
TCN5-I_1170	0	0	0	0	2	2	1	1	2	1	2	3	0	0	0
TCN2-LTR_1258	0	0	0	0	5	5	0	1	1	0	3	3	0	2	2
TCN2-LTR_1257	0	0	0	0	0	0	1	1	2	0	0	0	0	0	0
TCN760_119	1	27	28	0	2	2	0	0	0	0	0	0	0	0	0
TCN2-LTR_1256	1	1	2	1	0	1	1	0	1	1	0	1	1	1	2
TCN760_118	0	0	0	0	0	0	0	2	2	0	0	0	0	1	1
TCN2-LTR_78	5	1	6	0	0	0	0	0	0	0	0	0	2	0	2
TCN2-LTR_77	4	8	12	0	2	2	0	0	0	0	1	1	2	1	3
TCN2-LTR_76	5	9	14	0	3	3	0	0	0	0	2	2	0	2	2
TCN6-I_394	0	1	1	0	8	8	0	6	6	0	2	2	0	2	2
TCN6-I_393	0	1	1	0	1	1	0	1	1	0	0	0	0	0	0
TCN5-I_1169	0	0	0	0	0	0	0	0	0	0	0	0	0	0	0
TCN5-I_1168	0	0	0	0	3	3	0	3	3	0	4	4	0	1	1
TCN5-I_1167	3	0	3	8	4	12	6	10	16	7	7	14	2	2	4
LTR11_CN_354	0	0	0	0	0	0	0	0	0	0	0	0	0	0	0
LTR11_CN_353	0	2	2	1	9	10	2	3	5	6	2	8	3	1	4
LTR11_CN_352	0	0	0	1	0	1	2	2	4	1	0	1	0	0	0
LTR11_CN_351	0	0	0	0	1	1	0	1	1	0	0	0	0	0	0
LTR11_CN_350	0	0	0	0	0	0	0	0	0	0	0	0	0	0	0
Mariner-2_SLL_1318	0	0	0	0	0	0	0	1	1	6	1	7	0	0	0
TCN6-LTR_799	0	0	0	0	0	0	0	0	0	0	0	0	0	0	0
TCN6-LTR_798	4	0	4	47	0	47	0	0	0	2	0	2	0	0	0
HARBINGER1_CN_671	0	0	0	0	1	1	1	0	1	1	0	1	0	0	0
Helitron-1_AN_977	0	0	0	0	4	4	0	3	3	0	9	9	0	1	1
LTR12_CN_66	1	7	8	0	1	1	0	0	0	0	0	0	0	0	0
TCN5-LTR_627	1	1	2	0	8	8	0	8	8	0	1	1	0	1	1
TCN5-LTR_626	1	0	1	0	0	0	0	0	0	0	0	0	0	0	0
Gypsy-1_CPu-I_1308	0	2	2	0	27	27	0	17	17	0	5	5	0	8	8
LTR11_CN_65	43660	1898	45558	5	9	14	10	0	10	23	5	28	776	42	818
LTR11_CN_64	134292	1944	136236	10	3	13	39	1	40	251	26	277	481	64	545
LTR11_CN_63	19713	448	20161	1	25	26	2	0	2	5	0	5	40	2	42
TCN3-I_1156	0	0	0	1	0	1	2	0	2	0	0	0	2	0	2
TCN3-I_1155	3	4	7	7	2	9	3	5	8	4	2	6	5	4	9
TCN3-I_1154	0	2	2	0	1	1	1	4	5	0	4	4	0	1	1
TCN3-I_1153	9	2	11	22	0	22	12	1	13	16	0	16	8	1	9
TCN3-I_1152	5	1	6	25	5	30	28	5	33	7	1	8	13	6	19
TCN1-I_1251	0	0	0	0	0	0	0	0	0	6	0	6	3	1	4
TCN1-I_1250	0	0	0	1	0	1	0	2	2	2	0	2	0	0	0
Cnl1_52	14	180	194	13193	439	13632	0	0	0	249682	1306144	1555826	236233	1256241	1492474
LTR11_CN_675	0	0	0	2	0	2	1	0	1	0	0	0	0	0	0
Cnl1_51	14	183	197	13844	474	14318	0	0	0	262876	1437405	1700281	247246	1356851	1604097
LTR11_CN_674	0	0	0	0	0	0	0	0	0	0	0	0	0	0	0
Cnl1_50	13	186	199	13982	476	14458	0	0	0	262852	1459879	1722731	247705	1408966	1656671
LTR11_CN_673	0	0	0	10	0	10	2	0	2	4	0	4	6	0	6
LTR11_CN_672	0	0	0	1	0	1	1	0	1	0	0	0	0	0	0
Copia-6_Trm-I_974	0	1	1	0	4	4	1	7	8	0	5	5	2	0	2
Copia-6_Trm-I_973	10	0	10	107	4	111	91	3	94	47	1	48	33	2	35
TCN3-LTR_1270	0	0	0	2	0	2	6	0	6	8	0	8	5	0	5
TCN1-I_1249	1	1	2	0	16	16	0	14	14	0	2	2	3	4	7
TCN1-I_1248	0	0	0	0	0	0	0	0	0	0	0	0	0	0	0
TCN1-I_1247	3	61	64	12	62	74	10	61	71	3	283	286	4	292	296
Cnl1_49	13	179	192	14153	479	14632	0	0	0	263245	1425682	1688927	247894	1341909	1589803
Cnl1_48	14	193	207	14022	486	14508	0	0	0	264278	1500448	1764726	248353	1453155	1701508
Cnl1_47	14	185	199	13537	459	13996	0	0	0	256799	1428495	1685294	241483	1349208	1590691
Cnl1_46	2	4	6	2823	78	2901	5	0	5	56560	143446	200006	68087	149853	217940
Cnl1_45	14	141	155	6180	207	6387	0	0	0	146019	474858	620877	153168	530790	683958
Cnl1_44	13	116	129	6103	200	6303	0	0	0	143855	461726	605581	153772	515508	669280
Cnl1_43	4	109	113	5180	146	5326	0	1	1	118692	314793	433485	125515	356854	482369
Cnl1_42	12	103	115	5621	185	5806	0	0	0	119076	444582	563658	128490	497447	625937
Cnl1_41	14	177	191	9261	297	9558	0	0	0	220076	752355	972431	213564	897532	1111096
Cnl1_40	5	75	80	2953	154	3107	0	0	0	99569	478536	578105	85061	627502	712563
TCN3-LTR_1269	0	0	0	1	0	1	0	0	0	0	0	0	0	1	1
TCN3-LTR_1268	0	0	0	0	2	2	2	0	2	0	0	0	0	0	0
TCN3-LTR_1267	1	1	2	1	6	7	1	3	4	4	0	4	0	1	1
TCN3-LTR_1266	1	0	1	4	0	4	5	0	5	6	0	6	6	0	6
TCN3-LTR_1265	0	0	0	3	3	6	4	1	5	3	0	3	1	0	1
TCN3-LTR_1264	33	1	34	5	0	5	11	2	13	5	0	5	7	1	8
TCN3-LTR_1263	0	0	0	0	0	0	0	0	0	0	0	0	0	0	0
Gypsy-3_BG-I_157	0	0	0	0	0	0	0	0	0	0	0	0	0	0	0
LTR12_CN_1317	1	0	1	0	1	1	0	2	2	0	1	1	1	1	2
Cnl1_39	13	172	185	10403	357	10760	0	0	0	246271	1009035	1255306	234592	1315942	1550534
Cnl1_38	5	81	86	8182	245	8427	2	1	3	189039	640037	829076	187356	779141	966497
Cnl1_37	14	156	170	8197	314	8511	1	0	1	211888	906046	1117934	202364	1121787	1324151
Cnl1_36	0	0	0	207	17	224	0	0	0	10	18	28	20	53	73
Cnl1_35	0	0	0	269	13	282	0	0	0	14	15	29	26	48	74
Cnl1_34	0	0	0	291	21	312	0	0	0	14	20	34	27	66	93
Cnl1_33	0	0	0	284	21	305	0	0	0	13	20	33	26	66	92
Cnl1_32	0	0	0	283	17	300	0	0	0	14	18	32	26	56	82
Cnl1_31	0	0	0	296	22	318	0	0	0	15	20	35	29	70	99
Cnl1_30	0	0	0	291	21	312	0	0	0	14	20	34	27	66	93
Cnl1_29	0	0	0	211	21	232	0	0	0	12	15	27	23	57	80
Cnl1_28	0	0	0	291	21	312	0	0	0	14	20	34	27	66	93
Cnl1_27	0	0	0	276	17	293	0	0	0	13	18	31	25	56	81
Cnl1_26	0	0	0	282	17	299	0	0	0	14	14	28	26	49	75
Cnl1_25	0	0	0	211	21	232	0	0	0	12	19	31	23	63	86
Cnl1_24	0	0	0	291	21	312	0	0	0	14	20	34	27	66	93
Cnl1_23	0	0	0	263	14	277	0	0	0	15	14	29	27	43	70
Cnl1_22	13	90	103	8122	252	8374	1	0	1	178624	794484	973108	168060	862386	1030446
Cnl1_21	14	146	160	10242	333	10575	0	1	1	217062	1106670	1323732	203993	1172290	1376283
Cnl1_20	14	168	182	11243	374	11617	0	0	0	238696	1237739	1476435	228272	1192651	1420923
Copia-6_Trm-I_1231	0	0	0	2	1	3	6	0	6	0	0	0	0	1	1
Copia-6_Trm-I_1230	0	0	0	0	3	3	2	2	4	1	2	3	2	2	4
Zisupton-3_PGr_714	0	10	10	0	101	101	1	1	2	7	93	100	1	46	47
Cnl1_19	13	164	177	11188	374	11562	0	0	0	223183	1294337	1517520	215724	1227021	1442745
Cnl1_18	4	81	85	9334	295	9629	0	0	0	170584	1106755	1277339	154180	1020427	1174607
Cnl1_17	7	152	159	9829	324	10153	0	0	0	204110	1168292	1372402	193389	1139094	1332483
Cnl1_16	14	132	146	11167	342	11509	0	0	0	223628	1151422	1375050	213652	1149898	1363550
Cnl1_15	13	172	185	11371	366	11737	0	0	0	223491	1206993	1430484	212920	1198479	1411399
Cnl1_14	13	124	137	10801	352	11153	0	1	1	212289	1267775	1480064	200889	1204369	1405258
Cnl1_13	13	128	141	11604	369	11973	0	0	0	236240	1238714	1474954	224304	1258125	1482429
Cnl1_12	13	161	174	11179	375	11554	0	0	0	232915	1307098	1540013	224967	1253220	1478187
Cnl1_11	6	158	164	11584	364	11948	0	0	0	237807	1211031	1448838	229218	1212094	1441312
Cnl1_10	6	172	178	11509	347	11856	1	1	2	244463	1140335	1384798	229314	1138622	1367936
Copia-6_Trm-I_1229	0	0	0	9	0	9	16	0	16	1	0	1	1	0	1
Gypsy-23_ADe-I_61	0	0	0	0	1	1	0	0	0	0	0	0	0	0	0
TCN5-LTR_916	0	0	0	11	0	11	10	1	11	5	0	5	1	2	3
TCN1-I_197	0	0	0	1	0	1	1	0	1	0	0	0	0	0	0
TCN5-LTR_915	0	0	0	0	1	1	0	5	5	0	1	1	0	0	0
TCN1-I_196	0	0	0	2	0	2	0	1	1	0	0	0	0	0	0
TCN5-LTR_914	2	0	2	0	0	0	0	0	0	0	0	0	0	0	0
TCN1-I_195	0	0	0	3	1	4	0	0	0	1	0	1	2	0	2
TCN5-LTR_913	0	2	2	0	0	0	0	0	0	0	0	0	0	0	0
TCN1-I_194	35	21	56	66	4	70	71	6	77	72	58	130	77	86	163
TCN1-I_193	4	1	5	12	3	15	3	3	6	6	1	7	7	2	9
CACTA-1_Ccinerea_126	0	0	0	0	1	1	0	4	4	0	3	3	0	6	6
LTR11_CN_981	0	0	0	0	30	30	1	2	3	0	0	0	0	1	1
LTR11_CN_980	1	0	1	4	1	5	6	1	7	1	0	1	2	0	2
Copia-58_BG-I_1134	0	0	0	0	0	0	0	0	0	0	0	0	0	0	0
TCN4-I_230	0	0	0	0	1	1	0	0	0	0	0	0	0	0	0
LTR11_CN_979	0	0	0	0	6	6	0	0	0	0	0	0	0	0	0
LTR11_CN_978	0	0	0	2	1	3	0	0	0	0	0	0	0	0	0
Cnl1_272	1	0	1	14	5	19	18	2	20	8	0	8	7	4	11
Cnl1_271	1	0	1	12	35	47	6	27	33	7	21	28	53	24	77
Cnl1_270	2	117	119	17	569	586	13	7	20	12	132	144	8	93	101
Gypsy-20_PGr-I_585	3	0	3	5	1	6	3	0	3	5	0	5	1	0	1
TCN4-I_229	0	0	0	2	0	2	0	0	0	0	0	0	0	0	0
TCN4-I_228	0	2	2	0	7	7	0	4	4	0	1	1	0	1	1
TCN4-I_227	4	2	6	19	0	19	2	0	2	2	2	4	1	5	6
TCN4-I_226	1	2	3	5	1	6	2	0	2	7	0	7	3	2	5
Cnl1_269	13	171	184	11049	399	11448	0	4	4	230429	931828	1162257	224327	1195345	1419672
Cnl1_268	14	183	197	13084	471	13555	0	0	0	182681	807302	989983	185219	723855	909074
Cnl1_267	14	186	200	14414	526	14940	0	0	0	257767	1351965	1609732	244596	1361182	1605778
Cnl1_266	1	0	1	0	2	2	0	2	2	0	0	0	0	0	0
Cnl1_265	0	2	2	0	2	2	0	0	0	0	1	1	0	1	1
Cnl1_264	1	2	3	0	0	0	0	1	1	0	0	0	0	0	0
Cnl1_263	0	1	1	5	0	5	2	3	5	2	0	2	3	1	4
Cnl1_262	64	2	66	296	0	296	265	2	267	81	3	84	66	0	66
Cnl1_261	0	0	0	2511	83	2594	0	0	0	2312	198035	200347	1438	13149	14587
Cnl1_260	0	12	12	0	113	113	1	9	10	7	98	105	2	49	51
TCN4-LTR_1275	0	0	0	0	2	2	1	2	3	0	0	0	0	0	0
Copia-53_MLP-I_578	0	0	0	0	0	0	2	1	3	0	0	0	0	0	0
Cnl1_259	10	125	135	6467	223	6690	0	0	0	160770	750612	911382	133685	982920	1116605
Cnl1_258	110	2	112	347	7	354	414	0	414	117	0	117	142	3	145
Cnl1_257	14	154	168	9838	411	10249	1	0	1	194753	797141	991894	189081	1003840	1192921
Cnl1_256	0	8	8	9	13	22	5	13	18	0	16	16	2	11	13
TCN6-I_632	1	1	2	2	0	2	3	0	3	1	0	1	4	0	4
Cnl1_255	0	0	0	603	15	618	0	0	0	103	1139	1242	95	1014	1109
TCN6-I_631	0	0	0	0	5	5	2	7	9	2	4	6	4	1	5
Cnl1_254	1	0	1	0	0	0	0	2	2	0	2	2	0	0	0
TCN6-I_630	0	19	19	15	99	114	12	83	95	3	39	42	6	31	37
Cnl1_253	7	11	18	0	0	0	0	0	0	20	21	41	0	0	0
Cnl1_252	1	40	41	1634	77	1711	0	0	0	35971	158359	194330	41064	167568	208632
Cnl1_251	0	2	2	1235	17	1252	0	0	0	27448	69844	97292	23763	58532	82295
TCN1-LTR_366	0	0	0	0	0	0	1	0	1	1	0	1	1	0	1
TCN1-LTR_365	0	0	0	1	3	4	0	6	6	0	1	1	1	1	2
TCN1-LTR_364	0	0	0	1	0	1	0	1	1	0	0	0	0	0	0
TCN1-LTR_363	1	0	1	5	0	5	0	0	0	1	0	1	2	0	2
TCN1-LTR_362	0	2	2	1	6	7	0	10	10	2	2	4	1	4	5
TCN1-LTR_361	1	0	1	0	1	1	0	3	3	0	3	3	0	1	1
TCN1-LTR_360	0	0	0	0	0	0	0	0	0	0	0	0	0	0	0
